# Supplementary material for: Unveiling the reactivity of 2 H -(thio)pyran-2-(thi)ones in cycloaddition reactions with strained alkynes through density functional theory studies
Source: Royal Society of Chemistry journal article supplement (doi:10.1039/d4ob01263a), 2024-01-01
Supplement: d4ob01263a1.pdf [file d4ob01263a1.pdf]

## *Supporting Information for*

# **Unveiling the Reactivity of 2H-(Thio)pyran-2-(thi)ones in Cycloaddition Reactions with Strained Alkynes through Density Functional Theory Studies**

Wei Huang,<sup>a</sup> Kangqiao Wen,<sup>a</sup> Scott T. Laughlin\*<sup>a</sup> and Jorge Escorihuela\*<sup>b</sup>

<sup>a</sup> Department of Chemistry, Stony Brook University, Stony Brook, NY 11790, United States

<sup>b</sup> Departamento de Química Orgánica, Universitat de València, Avda. Vicente Andrés Estellés s/n, Burjassot 46100, Valencia, Spain

E-mail: scott.laughlin@stonybrook.edu, jorge.escorihuela@uv.es

## **Table of Contents**

|                                                                                                                                  |    |
|----------------------------------------------------------------------------------------------------------------------------------|----|
| <b>1. General materials and methods.</b> .....                                                                                   | 2  |
| <b>2. Computational details</b> .....                                                                                            | 3  |
| <b>2.1. Supplementary tables.</b> .....                                                                                          | 4  |
| <b>2.2. Supplementary figures.</b> .....                                                                                         | 7  |
| <b>2.3. Cartesian coordinates for all the optimized species at the M06-2X/6-311+G(d,p) level of theory in water (SMD).</b> ..... | 8  |
| <b>3. Kinetics determination and cycloadducts characterization details</b> .....                                                 | 27 |
| <b>3.1. 2<sup>nd</sup> order rate constant determination between PyrS2 and dienophiles</b> .....                                 | 27 |
| <b>3.2. Cycloadducts characterization details</b> .....                                                                          | 30 |
| <b>4. NMR spectra</b> .....                                                                                                      | 32 |
| <b>5. References</b> .....                                                                                                       | 40 |

## 1. General materials and methods.

All chemical reagents were of analytical grade, obtained from commercial suppliers, and used without further purification unless otherwise specified. Reactions were monitored by thin layer chromatography on pre-coated glass TLC plates (Analtech UNIPLATE™ silica gel HLF w/ organic binder, 250 μm thickness, with UV254 indicator) or by LC/MS (Agilent 6110 Single Quad, LC-MS, direct-injection mode, ESI). TLC plates were visualized by UV illumination or developed with potassium permanganate stain. NMR spectra (<sup>1</sup>H and <sup>13</sup>C) were obtained using a 400, 500, or 700 MHz Bruker spectrometer and analyzed using MestReNova. <sup>1</sup>H and <sup>13</sup>C chemical shifts (δ) were referenced to residual solvent peaks. The following residual solvent peaks were chosen: (for <sup>1</sup>H NMR) CDCl<sub>3</sub>, 7.26 ppm; (for <sup>13</sup>C NMR) CDCl<sub>3</sub>, 77.16 ppm. The following abbreviations were used to define <sup>1</sup>H NMR peaks: s, singlet; d, doublet; t, triplet; q, quartet; m, multiplet. High-resolution electrospray ionization (ESI) mass spectra were obtained at CASDA Mass Spectrometry Center at Stony Brook University. The absorption spectrum and kinetics were measured on a Biotek EPOCH 2 microplate reader. On one hand, **exo-BCN** was commercially available and used as received. On the other hand, **PyrS2**<sup>1</sup>, **DBCO**<sup>2</sup>, **DMBCN**<sup>3</sup>, and **Cp-7HT**<sup>4</sup> were synthesized according to previous reports.

Comment [SL]: Names check

Comment [SL]: Changed:  
DBCO-Ac to DBCO in main text and SI

## 2. Computational details

All calculations were performed using Gaussian 16.<sup>6</sup> Geometry optimizations of the minima and transition states were carried out using the M06-2X functional<sup>7</sup> with the 6-311+G(d,p) basis set and SMD model for solvent (50% CH<sub>3</sub>CN/H<sub>2</sub>O mixture,  $\chi = 55.69$  at 25 °C).<sup>8</sup> Vibrational frequencies were computed at the same level to verify that optimized structures are energy minima or transition structures and to evaluate zero-point vibrational energies (ZPVE) and thermal corrections at 298 K. Intrinsic reaction coordinate (IRC) calculations were performed to verify the expected connections of the first-order saddle points with the local minima found on the potential energy surface.<sup>9</sup> Distortion/interaction analysis were done at the M06-2X/6-311+G(d,p) level. To this end, the optimized transition state structure is separated into two fragments (distorted BCN and distorted heterocyclic structure), followed by single-point energy calculations on each fragment obtained from the IRC analysis. The energy difference between the distorted fragment and corresponding optimized structure is defined as the distortion energy. The difference between the activation energy and the total distortion energy is the interaction energy.<sup>10</sup> The optimized structures indicated and shown in this study are illustrated using the CYLview program.<sup>11</sup>

## 2.1. Supplementary tables.

**Table S1.** Energetics (in Hartree) of all stationary points.

**E:** Electronic Energy, **E(ZPE):** Zero Point Corrected Energy, **H:** Enthalpy, **G:** Gibbs energy

| Structure             | E               | E(ZPE)        | H             | G             |
|-----------------------|-----------------|---------------|---------------|---------------|
| <b>1</b>              | -464.544920557  | -464.324582   | -464.313102   | -464.360067   |
| <b>2</b>              | -343.336211986  | -343.255483   | -343.249348   | -343.284450   |
| <b>3</b>              | -666.295373193  | -666.218004   | -666.211322   | -666.248001   |
| <b>4</b>              | -666.280184903  | -666.201671   | -666.195171   | -666.231637   |
| <b>5</b>              | -989.249134145  | -989.173859   | -989.166824   | -989.204783   |
| <b>RC-2</b>           | -807,892719837  | -807,590182   | -807,571857   | -807,636189   |
| <b>RC-3</b>           | -1.130,85229857 | -1.130,553246 | -1.130,534260 | -1.130,600672 |
| <b>RC-4</b>           | -1.130,83748778 | -1.130,537396 | -1.130,518567 | -1.130,584417 |
| <b>RC-5</b>           | -1.453,80619117 | -1.453,509603 | -1.453,490060 | -1.453,558482 |
| <b>TS1-2</b>          | -807.867512552  | -807.565008   | -807.548041   | -807.608405   |
| <b>TS1-3</b>          | -1130.82080927  | -1130.521757  | -1130.504129  | -1130.565867  |
| <b>TS1-4</b>          | -1130.81346697  | -1130.513374  | -1130.495883  | -1130.557890  |
| <b>TS1-5</b>          | -1453.77563074  | -1453.479090  | -1453.460943  | -1453.524479  |
| <b>6</b>              | -807.947475588  | -807.639474   | -807.623622   | -807.681178   |
| <b>7</b>              | -1130.90974296  | -1130.605198  | -1130.588652  | -1130.647759  |
| <b>8</b>              | -1130.88236534  | -1130.577750  | -1130.561104  | -1130.621243  |
| <b>9</b>              | -1453.85960882  | -1453.557642  | -1453.540606  | -1453.601532  |
| <b>TS2-2</b>          | -807.916147927  | -807.611080   | -807.594932   | -807.653287   |
| <b>TS2-3</b>          | -1130.87556349  | -1130.573641  | -1130.556571  | -1130.617585  |
| <b>TS2-4</b>          | -1130.86609309  | -1130.563371  | -1130.546758  | -1130.606725  |
| <b>TS2-5</b>          | -1453.82525959  | -1453.526152  | -1453.508402  | -1453.571600  |
| <b>10</b>             | -619.421376131  | -619.129578   | -619.115444   | -619.169195   |
| <b>CO<sub>2</sub></b> | -188.571432072  | -188.559701   | -188.556144   | -188.581037   |
| <b>COS</b>            | -511.517209778  | -511.508060   | -511.504270   | -511.530562   |
| <b>CS<sub>2</sub></b> | -834.462963952  | -834.456050   | -834.452015   | -834.479621   |

**Table S2.** Energetics (in Hartree) of all stationary points.E: Electronic Energy, **E(ZPE)**: Zero Point Corrected Energy, **H**: Enthalpy, **G**: Gibbs energy

| <b>Structure</b>       | <b>E</b>       | <b>E(ZPE)</b> | <b>H</b>     | <b>G</b>     |
|------------------------|----------------|---------------|--------------|--------------|
| <i>endo</i> -BCN       | -464.544721303 | -464.324390   | -464.312900  | -464.359906  |
| <i>exo</i> -BCN        | -464.547800739 | -464.327806   | -464.316277  | -464.363428  |
| DMBCN                  | -579.076111520 | -578.822929   | -578.808610  | -578.862073  |
| MeCp                   | -709.455527595 | -709.199919   | -709.182966  | -709.246142  |
| DBCO                   | -785.454988490 | -785.199505   | -785.183765  | -785.241099  |
| Si7HT                  | -1136.51189229 | -1136.199731  | -1136.178392 | -1136.247624 |
| PyrS2                  | -1121.99979941 | -1121.835430  | -1121.819762 | -1121.880024 |
| TS- <i>endo</i> -BCN   | -1586.54208636 | -1586.156797  | -1586.129959 | -1586.213547 |
| TS- <i>exo</i> -BCN    | -1586.54165981 | -1586.156349  | -1586.129511 | -1586.213093 |
| TS-DMBCN               | -1701.07136215 | -1700.652355  | -1700.622975 | -1700.712224 |
| TS-MeCp                | -1831.44501715 | -1831.022911  | -1830.991401 | -1831.088427 |
| TS-DBCO                | -1907.44003686 | -1907.019360  | -1906.988372 | -1907.081097 |
| TS-Si7HT               | -2258.51522839 | -2258.037376  | -2258.000794 | -2258.104949 |
| PROD- <i>endo</i> -BCN | -1586.61197020 | -1586.221308  | -1586.195525 | -1586.277253 |
| PROD - <i>exo</i> -BCN | -1586.61595316 | -1586.225556  | -1586.199841 | -1586.281041 |
| PROD -DMBCN            | -1701.14627047 | -1700.721588  | -1700.693656 | -1700.779440 |
| PROD -MeCp             | -1831.53004728 | -1831.102585  | -1831.072089 | -1831.167591 |
| PROD -DBCO             | -1907.52569243 | -1907.100776  | -1907.070471 | -1907.162000 |
| PROD -Si7HT            | -2258.58744853 | -2258.105532  | -2258.069719 | -2258.172473 |

**Table S3.** Gibbs activation energies at different levels of theory.

A comparison between M06-2X/6-311+G(d,p), M06-2X/Def2TZVPP and  $\omega$ B97xD/Def2TZVPP methods was performed for the RDS (**TS1**) to validate the results and all the methods yield very similar results in terms of Gibb activation energies.

| M06-2X/6-311+G(d,p)                         | M06-2X/Def2TZVPP                            | $\omega$ B97xD/Def2TZVPP                    |
|---------------------------------------------|---------------------------------------------|---------------------------------------------|
| $\Delta G^\ddagger$ (TS1-2) = 22.7 kcal/mol | $\Delta G^\ddagger$ (TS1-2) = 22.4 kcal/mol | $\Delta G^\ddagger$ (TS1-2) = 23.5 kcal/mol |
| $\Delta G^\ddagger$ (TS1-3) = 26.5 kcal/mol | $\Delta G^\ddagger$ (TS1-3) = 25.8 kcal/mol | $\Delta G^\ddagger$ (TS1-3) = 28.2 kcal/mol |
| $\Delta G^\ddagger$ (TS1-4) = 21.2 kcal/mol | $\Delta G^\ddagger$ (TS1-4) = 21.1 kcal/mol | $\Delta G^\ddagger$ (TS1-4) = 23.4 kcal/mol |
| $\Delta G^\ddagger$ (TS1-5) = 25.3 kcal/mol | $\Delta G^\ddagger$ (TS1-5) = 25.7 kcal/mol | $\Delta G^\ddagger$ (TS1-5) = 27.4 kcal/mol |

**Table S4.** Geometrical parameters of critical stationary points for *endo*-BCN (**1**).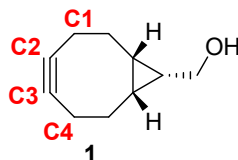

| Structure    | Distance (C2-C3) | Angle (C1-C2-C3) | Dihedral angle (C1-C2-C3-C4) |
|--------------|------------------|------------------|------------------------------|
| <b>1</b>     | 1.21 Å           | 154.6°           | -1.1°                        |
| <b>TS1-2</b> | 1.24 Å           | 152.7°           | -5.6°                        |
| <b>TS1-3</b> | 1.24 Å           | 151.7°           | -1.7°                        |
| <b>TS1-4</b> | 1.23 Å           | 154.6°           | -5.3°                        |
| <b>TS1-5</b> | 1.23 Å           | 153.0°           | -0.9°                        |

2.2. Supplementary figures.

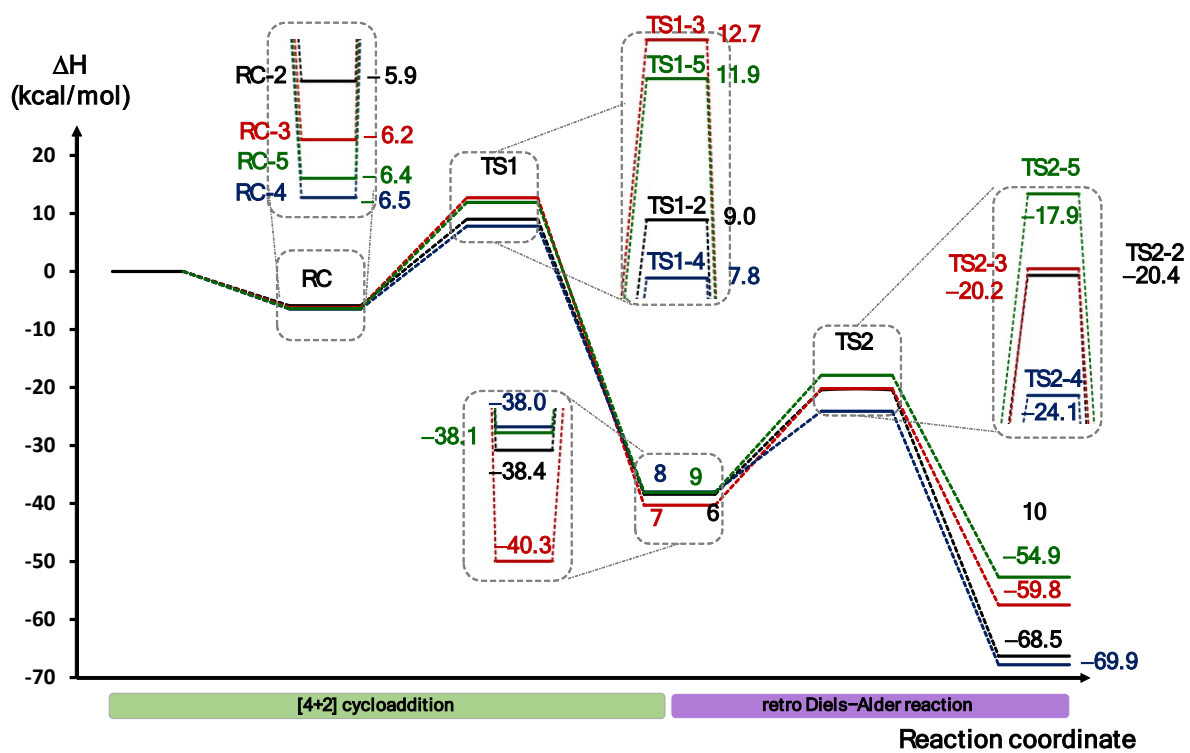

**Fig. S1** Enthalpy profile (in kcal/mol) for the cycloaddition of *endo*-BCN (1) with dienes 2, 3, 4 and 5.

### 2.3. Cartesian coordinates for all the optimized species at the M06-2X/6-311+G(d,p) level of theory in water (SMD).

#### BCN (1)

E(electronic) = -464.536915442  
 Zero-point correction= 0.219682 (Hartree/Particle)  
 Thermal correction to Energy= 0.230274  
 Thermal correction to Enthalpy= 0.231219  
 Thermal correction to Gibbs Free Energy= 0.184123  
 Sum of electronic and zero-point Energies= -464.317234  
 Sum of electronic and thermal Energies= -464.306641  
 Sum of electronic and thermal Enthalpies= -464.305697  
 Sum of electronic and thermal Free Energies= -464.352792

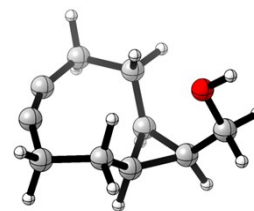

|   |              |              |              |   |              |              |              |
|---|--------------|--------------|--------------|---|--------------|--------------|--------------|
| 6 | 2.317376000  | 0.604186000  | -0.262244000 | 1 | -0.365474000 | 2.604929000  | -0.122216000 |
| 6 | 2.317677000  | -0.601924000 | -0.270967000 | 6 | -0.264359000 | 0.757264000  | 0.962867000  |
| 6 | 1.693324000  | 1.928625000  | -0.166874000 | 6 | -0.257933000 | -0.766733000 | 0.959031000  |
| 1 | 1.985387000  | 2.432510000  | 0.758539000  | 6 | -1.563080000 | -0.011254000 | 1.022104000  |
| 1 | 1.972702000  | 2.577722000  | -0.998997000 | 1 | -2.028412000 | -0.015653000 | 2.003895000  |
| 6 | 1.694162000  | -1.927717000 | -0.191916000 | 1 | 0.042808000  | -1.191302000 | 1.914178000  |
| 1 | 1.990072000  | -2.444502000 | 0.725127000  | 1 | 0.029381000  | 1.177408000  | 1.922159000  |
| 1 | 1.970269000  | -2.565155000 | -1.034047000 | 6 | -2.653081000 | -0.024602000 | -0.023914000 |
| 6 | 0.168270000  | -1.650416000 | -0.200247000 | 1 | -3.323833000 | 0.821135000  | 0.167176000  |
| 1 | -0.091153000 | -1.194837000 | -1.155599000 | 1 | -3.238021000 | -0.943649000 | 0.098980000  |
| 1 | -0.363531000 | -2.605862000 | -0.138753000 | 8 | -2.161797000 | 0.051229000  | -1.361040000 |
| 6 | 0.167798000  | 1.650607000  | -0.187228000 | 1 | -2.922441000 | -0.012909000 | -1.948328000 |
| 1 | -0.084302000 | 1.202121000  | -1.147462000 |   |              |              |              |

#### 2H-pyran-2-one (2)

E(electronic) = -343.336211986  
 Zero-point correction= 0.080729 (Hartree/Particle)  
 Thermal correction to Energy= 0.085920  
 Thermal correction to Enthalpy= 0.086864  
 Thermal correction to Gibbs Free Energy= 0.051762  
 Sum of electronic and zero-point Energies= -343.255483  
 Sum of electronic and thermal Energies= -343.250292  
 Sum of electronic and thermal Enthalpies= -343.249348  
 Sum of electronic and thermal Free Energies= -343.284450

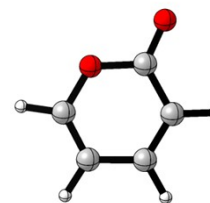

|   |              |              |              |   |              |              |              |
|---|--------------|--------------|--------------|---|--------------|--------------|--------------|
| 6 | -1.770423000 | -0.061096000 | -0.000007000 | 8 | 0.329760000  | -1.139496000 | -0.000023000 |
| 6 | -1.023652000 | -1.176791000 | 0.000025000  | 1 | 0.810813000  | 2.183946000  | 0.000068000  |
| 6 | 1.037866000  | 0.043080000  | -0.000198000 | 1 | -2.848084000 | -0.132655000 | 0.000025000  |
| 6 | 0.259869000  | 1.253543000  | -0.000022000 | 8 | 2.251037000  | -0.050143000 | 0.000153000  |
| 6 | -1.093585000 | 1.198419000  | -0.000006000 | 1 | -1.672709000 | 2.114561000  | 0.000049000  |
| 1 | -1.396840000 | -2.191670000 | 0.000076000  |   |              |              |              |

#### 2H-thiopyranthio-2-one (3)

E(electronic) = -666.295373193  
 Zero-point correction= 0.077369 (Hartree/Particle)  
 Thermal correction to Energy= 0.083107  
 Thermal correction to Enthalpy= 0.084051  
 Thermal correction to Gibbs Free Energy= 0.047372  
 Sum of electronic and zero-point Energies= -666.218004  
 Sum of electronic and thermal Energies= -666.212266  
 Sum of electronic and thermal Enthalpies= -666.211322  
 Sum of electronic and thermal Free Energies= -666.248001

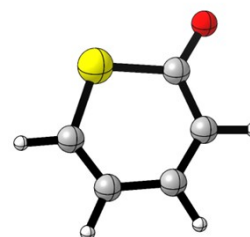

|   |              |              |              |    |              |              |              |
|---|--------------|--------------|--------------|----|--------------|--------------|--------------|
| 6 | -1.905774000 | 0.239373000  | 0.000224000  | 1  | -1.649256000 | 2.377614000  | 0.000104000  |
| 6 | -1.355365000 | -0.991802000 | 0.000242000  | 1  | 0.761820000  | 2.421476000  | -0.000097000 |
| 6 | 1.100852000  | 0.314971000  | -0.000101000 | 1  | -2.984984000 | 0.326732000  | 0.000274000  |
| 6 | 0.239361000  | 1.471030000  | -0.000031000 | 16 | 0.341273000  | -1.302540000 | -0.000085000 |
| 6 | -1.117717000 | 1.432315000  | 0.000082000  | 8  | 2.325000000  | 0.351748000  | -0.000207000 |
| 1 | -1.956101000 | -1.894488000 | 0.000235000  |    |              |              |              |



### 2H-pyran-2-one (4)

E(electronic) = -666.280184903  
Zero-point correction= 0.078513 (Hartree/Particle)  
Thermal correction to Energy= 0.084070  
Thermal correction to Enthalpy= 0.085014  
Thermal correction to Gibbs Free Energy= 0.048548  
Sum of electronic and zero-point Energies= -666.201671  
Sum of electronic and thermal Energies= -666.196115  
Sum of electronic and thermal Enthalpies= -666.195171  
Sum of electronic and thermal Free Energies= -666.231637

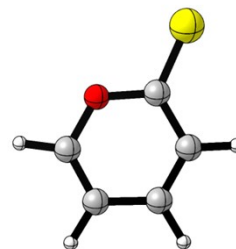

|   |              |              |              |
|---|--------------|--------------|--------------|
| 6 | 2.202761000  | -0.081284000 | 0.000099000  |
| 6 | 1.432712000  | -1.184956000 | 0.000128000  |
| 6 | -0.598294000 | 0.059201000  | -0.000085000 |
| 6 | 0.186808000  | 1.247350000  | -0.000018000 |
| 6 | 1.546934000  | 1.181627000  | 0.000073000  |
| 1 | 3.278975000  | -0.173118000 | 0.000038000  |

|    |              |              |              |
|----|--------------|--------------|--------------|
| 1  | 1.781946000  | -2.208091000 | 0.000090000  |
| 1  | -0.337683000 | 2.192223000  | -0.000079000 |
| 1  | 2.133686000  | 2.092557000  | 0.000100000  |
| 8  | 0.084456000  | -1.118927000 | 0.000021000  |
| 16 | -2.259881000 | -0.017736000 | -0.000093000 |

### 2H-thiopyranthio-2-one (5)

E(electronic) = -989.249134145  
Zero-point correction= 0.075276 (Hartree/Particle)  
Thermal correction to Energy= 0.081366  
Thermal correction to Enthalpy= 0.082310  
Thermal correction to Gibbs Free Energy= 0.044351  
Sum of electronic and zero-point Energies= -989.173859  
Sum of electronic and thermal Energies= -989.167768  
Sum of electronic and thermal Enthalpies= -989.166824  
Sum of electronic and thermal Free Energies= -989.204783

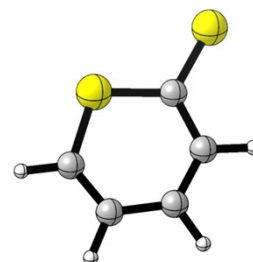

|   |              |              |              |
|---|--------------|--------------|--------------|
| 6 | -2.275880000 | 0.371461000  | 0.000337000  |
| 6 | -1.812268000 | -0.898729000 | 0.000255000  |
| 6 | 0.718139000  | 0.195712000  | -0.000147000 |
| 6 | -0.035250000 | 1.408045000  | -0.000302000 |
| 6 | -1.397619000 | 1.491877000  | -0.000036000 |
| 1 | -2.470103000 | -1.760917000 | 0.000378000  |

|    |              |              |              |
|----|--------------|--------------|--------------|
| 1  | -1.842790000 | 2.480475000  | -0.000169000 |
| 16 | -0.144859000 | -1.316401000 | -0.000080000 |
| 16 | 2.390279000  | 0.129644000  | 0.000024000  |
| 1  | 0.549234000  | 2.321025000  | -0.000580000 |
| 1  | -3.345787000 | 0.537319000  | 0.000626000  |

### RC-2

E(electronic) = -807.892719837  
Zero-point correction= 0.302537 (Hartree/Particle)  
Thermal correction to Energy= 0.319918  
Thermal correction to Enthalpy= 0.320863  
Thermal correction to Gibbs Free Energy= 0.256531  
Sum of electronic and zero-point Energies= -807.590182  
Sum of electronic and thermal Energies= -807.572802  
Sum of electronic and thermal Enthalpies= -807.571857  
Sum of electronic and thermal Free Energies= -807.636189

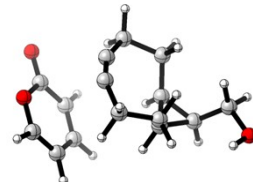

|   |              |              |              |
|---|--------------|--------------|--------------|
| 6 | -0.481535000 | 0.930090000  | 1.433543000  |
| 6 | -0.306921000 | -0.223720000 | 1.739957000  |
| 6 | -0.131855000 | 2.191876000  | 0.772007000  |
| 1 | -0.829254000 | 2.417891000  | -0.039673000 |
| 1 | -0.145797000 | 3.037524000  | 1.462249000  |
| 6 | 0.423287000  | -1.495667000 | 1.754662000  |
| 1 | -0.131688000 | -2.272136000 | 1.222219000  |
| 1 | 0.606063000  | -1.854731000 | 2.769290000  |
| 6 | 1.765665000  | -1.196532000 | 1.039450000  |
| 1 | 2.326849000  | -0.488354000 | 1.653856000  |
| 1 | 2.349073000  | -2.122884000 | 0.993239000  |
| 6 | 1.299450000  | 1.969919000  | 0.218934000  |
| 1 | 1.969502000  | 1.825144000  | 1.068608000  |
| 1 | 1.620727000  | 2.878600000  | -0.300231000 |
| 6 | 1.370960000  | 0.796701000  | -0.744841000 |
| 6 | 1.572867000  | -0.659576000 | -0.369381000 |
| 6 | 2.660722000  | 0.095839000  | -1.104646000 |
| 1 | 2.790863000  | -0.155322000 | -2.152417000 |

|   |              |              |              |
|---|--------------|--------------|--------------|
| 1 | 1.009514000  | -1.345828000 | -0.997738000 |
| 1 | 0.698704000  | 0.926169000  | -1.589207000 |
| 6 | 3.955313000  | 0.433665000  | -0.415333000 |
| 1 | 3.792851000  | 0.774605000  | 0.609391000  |
| 1 | 4.474284000  | 1.229334000  | -0.953149000 |
| 8 | 4.855808000  | -0.681126000 | -0.414380000 |
| 1 | 4.416906000  | -1.411269000 | 0.037473000  |
| 6 | -2.082409000 | -1.904227000 | -0.906431000 |
| 6 | -2.900986000 | -1.698428000 | 0.138527000  |
| 6 | -3.101858000 | 0.641067000  | -0.305909000 |
| 6 | -2.253217000 | 0.443490000  | -1.452002000 |
| 6 | -1.755828000 | -0.784334000 | -1.733214000 |
| 1 | -3.234719000 | -2.450433000 | 0.840321000  |
| 8 | -3.417842000 | -0.480796000 | -0.424333000 |
| 1 | -1.689975000 | -2.892538000 | -1.097509000 |
| 1 | -2.025254000 | 1.319602000  | -2.044182000 |
| 8 | -3.575307000 | 1.695184000  | 0.079099000  |
| 1 | -1.101849000 | -0.922430000 | -2.586899000 |

### RC-3

E(electronic) = -1130.85229857  
Zero-point correction= 0.299053 (Hartree/Particle)  
Thermal correction to Energy= 0.317094  
Thermal correction to Enthalpy= 0.318038  
Thermal correction to Gibbs Free Energy= 0.251627  
Sum of electronic and zero-point Energies= -1130.553246  
Sum of electronic and thermal Energies= -1130.535204  
Sum of electronic and thermal Enthalpies= -1130.534260

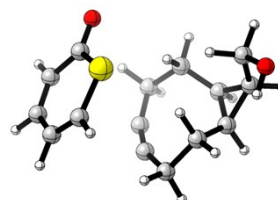

Sum of electronic and thermal Free Energies= -1130.600672

|   |              |              |              |    |              |              |              |
|---|--------------|--------------|--------------|----|--------------|--------------|--------------|
| 6 | -0.330619000 | 0.580300000  | 1.918907000  | 1  | 3.116724000  | 1.601744000  | 1.203428000  |
| 6 | -0.142971000 | 1.607413000  | 1.315347000  | 1  | 2.737361000  | -0.429544000 | 2.348666000  |
| 6 | -0.044093000 | -0.807593000 | 2.293275000  | 6  | 3.069197000  | -1.036161000 | -1.077891000 |
| 1 | 0.332824000  | -0.866003000 | 3.318062000  | 1  | 2.005708000  | -1.074483000 | -1.324775000 |
| 1 | -0.926998000 | -1.448185000 | 2.231605000  | 1  | 3.442575000  | -2.061650000 | -1.053517000 |
| 6 | 0.557964000  | 2.486338000  | 0.375199000  | 8  | 3.785006000  | -0.391426000 | -2.138933000 |
| 1 | 1.068056000  | 3.296528000  | 0.903293000  | 1  | 3.501245000  | 0.529743000  | -2.167121000 |
| 1 | -0.120503000 | 2.939867000  | -0.351102000 | 6  | -3.111390000 | 1.467823000  | -0.597491000 |
| 6 | 1.585218000  | 1.573755000  | -0.342249000 | 6  | -2.178988000 | 1.108737000  | -1.503991000 |
| 1 | 1.031322000  | 0.838368000  | -0.930432000 | 6  | -2.228047000 | -1.387381000 | -0.279679000 |
| 1 | 2.163535000  | 2.184734000  | -1.044328000 | 6  | -3.232263000 | -0.734009000 | 0.522446000  |
| 6 | 1.039959000  | -1.272402000 | 1.288521000  | 6  | -3.627224000 | 0.556756000  | 0.376075000  |
| 1 | 0.604633000  | -1.251338000 | 0.287427000  | 1  | -1.796235000 | 1.797831000  | -2.248789000 |
| 1 | 1.303446000  | -2.312177000 | 1.507866000  | 16 | -1.491712000 | -0.468696000 | -1.619133000 |
| 6 | 2.295024000  | -0.416567000 | 1.356160000  | 1  | -3.484492000 | 2.484353000  | -0.610964000 |
| 6 | 2.541786000  | 0.887947000  | 0.619729000  | 1  | -3.666540000 | -1.357085000 | 1.297185000  |
| 6 | 3.315577000  | -0.358314000 | 0.243056000  | 8  | -1.843774000 | -2.541006000 | -0.124052000 |
| 1 | 4.357294000  | -0.385341000 | 0.546001000  | 1  | -4.387211000 | 0.931389000  | 1.053014000  |

#### RC-4

E(electronic) = -1130.83748778

Zero-point correction= 0.300092 (Hartree/Particle)

Thermal correction to Energy= 0.317976

Thermal correction to Enthalpy= 0.318921

Thermal correction to Gibbs Free Energy= 0.253071

Sum of electronic and zero-point Energies= -1130.537396

Sum of electronic and thermal Energies= -1130.519511

Sum of electronic and thermal Enthalpies= -1130.518567

Sum of electronic and thermal Free Energies= -1130.584417

|   |              |              |              |    |              |              |              |
|---|--------------|--------------|--------------|----|--------------|--------------|--------------|
| 6 | 0.327780000  | -0.731410000 | 1.413888000  | 1  | -1.440809000 | 1.358084000  | -0.997689000 |
| 6 | 0.020869000  | 0.391879000  | 1.729840000  | 1  | -0.869894000 | -0.863523000 | -1.592733000 |
| 6 | 0.118544000  | -2.025534000 | 0.755714000  | 6  | -4.154664000 | -0.758678000 | -0.402460000 |
| 1 | 0.830259000  | -2.169350000 | -0.062029000 | 1  | -3.949629000 | -1.086564000 | 0.618737000  |
| 1 | 0.237049000  | -2.863268000 | 1.445805000  | 1  | -4.576139000 | -1.606555000 | -0.945736000 |
| 6 | -0.851432000 | 1.570807000  | 1.752992000  | 8  | -5.182958000 | 0.238976000  | -0.389674000 |
| 1 | -0.392697000 | 2.407526000  | 1.219705000  | 1  | -4.848674000 | 0.999220000  | 0.100185000  |
| 1 | -1.067596000 | 1.904675000  | 2.769663000  | 6  | 1.504832000  | 2.128135000  | -0.959106000 |
| 6 | -2.156403000 | 1.123339000  | 1.045602000  | 6  | 2.349755000  | 2.080942000  | 0.088589000  |
| 1 | -2.631924000 | 0.357775000  | 1.663674000  | 6  | 2.999764000  | -0.162952000 | -0.351301000 |
| 1 | -2.839098000 | 1.979360000  | 1.002993000  | 6  | 2.116562000  | -0.149625000 | -1.468609000 |
| 6 | -1.334268000 | -1.968925000 | 0.218306000  | 6  | 1.387668000  | 0.962197000  | -1.765024000 |
| 1 | -2.006655000 | -1.900260000 | 1.075713000  | 1  | 2.539635000  | 2.880591000  | 0.791052000  |
| 1 | -1.556441000 | -2.908572000 | -0.297668000 | 8  | 3.080375000  | 0.984279000  | 0.374305000  |
| 6 | -1.547184000 | -0.811808000 | -0.743925000 | 1  | 0.937007000  | 3.026247000  | -1.155416000 |
| 6 | -1.914753000 | 0.611011000  | -0.365041000 | 1  | 2.045097000  | -1.052227000 | -2.059395000 |
| 6 | -2.912043000 | -0.265137000 | -1.094370000 | 16 | 3.940234000  | -1.446590000 | 0.135637000  |
| 1 | -3.076116000 | -0.028765000 | -2.140845000 | 1  | 0.713378000  | 0.959562000  | -2.613831000 |

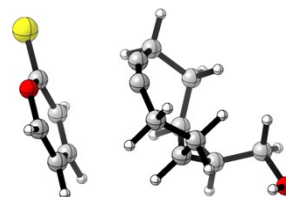

#### RC-5

E(electronic) = -1453.80619117

Zero-point correction= 0.296588 (Hartree/Particle)

Thermal correction to Energy= 0.315187

Thermal correction to Enthalpy= 0.316131

Thermal correction to Gibbs Free Energy= 0.247709

Sum of electronic and zero-point Energies= -1453.509603

Sum of electronic and thermal Energies= -1453.491005

Sum of electronic and thermal Enthalpies= -1453.490060

Sum of electronic and thermal Free Energies= -1453.558482

|   |              |              |              |    |              |              |              |
|---|--------------|--------------|--------------|----|--------------|--------------|--------------|
| 6 | -0.087249000 | 0.823709000  | 1.436372000  | 1  | 1.575697000  | -1.307296000 | -1.029803000 |
| 6 | 0.153866000  | -0.323024000 | 1.722349000  | 1  | 1.130972000  | 0.951755000  | -1.578062000 |
| 6 | 0.185098000  | 2.112962000  | 0.793728000  | 6  | 4.390943000  | 0.642349000  | -0.354893000 |
| 1 | -0.518008000 | 2.294814000  | -0.024697000 | 1  | 4.188195000  | 0.959155000  | 0.670234000  |
| 1 | 0.102579000  | 2.949749000  | 1.490166000  | 1  | 4.869396000  | 1.475924000  | -0.872429000 |
| 6 | 0.952803000  | -1.552449000 | 1.714489000  | 8  | 5.359359000  | -0.413801000 | -0.348894000 |
| 1 | 0.446599000  | -2.344625000 | 1.156402000  | 1  | 4.964730000  | -1.170549000 | 0.099912000  |
| 1 | 1.144997000  | -1.927780000 | 2.721506000  | 6  | -1.321675000 | -2.037649000 | -1.164010000 |
| 6 | 2.284946000  | -1.162149000 | 1.023967000  | 6  | -2.205080000 | -2.248057000 | -0.161140000 |
| 1 | 2.797863000  | -0.439787000 | 1.663816000  | 6  | -2.873448000 | 0.411562000  | -0.409823000 |
| 1 | 2.919337000  | -2.053485000 | 0.963089000  | 6  | -1.906992000 | 0.342137000  | -1.457200000 |
| 6 | 1.635012000  | 1.995154000  | 0.258430000  | 6  | -1.191644000 | -0.770095000 | -1.796800000 |
| 1 | 2.301568000  | 1.879216000  | 1.115360000  | 1  | -2.320911000 | -3.212151000 | 0.321794000  |
| 1 | 1.904187000  | 2.931306000  | -0.241339000 | 16 | -3.249457000 | -1.040905000 | 0.470575000  |
| 6 | 1.795404000  | 0.846524000  | -0.724094000 | 1  | -0.699137000 | -2.860159000 | -1.494233000 |
| 6 | 2.082400000  | -0.602216000 | -0.374834000 | 1  | -1.732253000 | 1.266557000  | -1.996869000 |

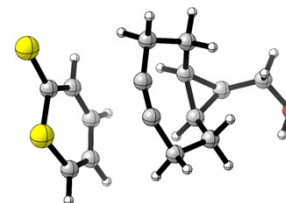

|   |             |             |              |
|---|-------------|-------------|--------------|
| 6 | 3.132938000 | 0.235378000 | -1.074379000 |
| 1 | 3.296992000 | 0.014599000 | -2.124216000 |

|    |              |              |              |
|----|--------------|--------------|--------------|
| 16 | -3.684288000 | 1.809694000  | 0.026978000  |
| 1  | -0.471695000 | -0.682263000 | -2.603297000 |

**TS1-2**

E(electronic) = -807.867512552  
 Zero-point correction= 0.302505 (Hartree/Particle)  
 Thermal correction to Energy= 0.318527  
 Thermal correction to Enthalpy= 0.319472  
 Thermal correction to Gibbs Free Energy= 0.259107  
 Sum of electronic and zero-point Energies= -807.565008  
 Sum of electronic and thermal Energies= -807.548985  
 Sum of electronic and thermal Enthalpies= -807.548041  
 Sum of electronic and thermal Free Energies= -807.608405

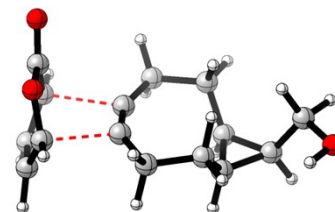

Frequency -414.0642

|   |              |              |              |
|---|--------------|--------------|--------------|
| 6 | 0.701629000  | 0.489328000  | 0.130622000  |
| 6 | 0.597786000  | -0.721446000 | -0.094016000 |
| 6 | 0.143750000  | 1.841611000  | 0.301287000  |
| 1 | 0.344863000  | 2.202888000  | 1.314670000  |
| 1 | 0.619369000  | 2.541791000  | -0.391044000 |
| 6 | -0.310683000 | -1.868555000 | -0.323381000 |
| 1 | -0.214588000 | -2.573132000 | 0.510281000  |
| 1 | -0.019414000 | -2.409114000 | -1.227759000 |
| 6 | -1.761315000 | -1.372638000 | -0.449493000 |
| 1 | -1.833647000 | -0.735252000 | -1.333992000 |
| 1 | -2.405374000 | -2.241473000 | -0.626264000 |
| 6 | -1.374314000 | 1.779134000  | 0.044144000  |
| 1 | -1.537018000 | 1.473124000  | -0.990865000 |
| 1 | -1.786983000 | 2.787010000  | 0.153613000  |
| 6 | -2.066451000 | 0.843763000  | 1.016569000  |
| 6 | -2.238101000 | -0.642948000 | 0.790794000  |
| 6 | -3.443073000 | 0.273079000  | 0.773408000  |
| 1 | -4.091678000 | 0.217124000  | 1.641603000  |

|   |              |              |              |
|---|--------------|--------------|--------------|
| 1 | -2.145618000 | -1.242428000 | 1.692030000  |
| 1 | -1.877157000 | 1.112789000  | 2.052028000  |
| 6 | -4.191582000 | 0.536729000  | -0.505155000 |
| 1 | -3.515754000 | 0.678420000  | -1.351064000 |
| 1 | -4.799042000 | 1.438603000  | -0.408871000 |
| 8 | -5.115210000 | -0.518900000 | -0.799381000 |
| 1 | -4.610528000 | -1.337266000 | -0.873396000 |
| 6 | 2.977808000  | -1.417330000 | 1.100602000  |
| 6 | 2.587992000  | -1.543524000 | -0.223996000 |
| 6 | 3.140589000  | 0.673502000  | -0.767511000 |
| 6 | 3.012280000  | 0.914589000  | 0.648693000  |
| 6 | 3.210160000  | -0.125173000 | 1.546469000  |
| 1 | 2.366830000  | -2.492617000 | -0.694232000 |
| 8 | 3.039129000  | -0.630409000 | -1.152645000 |
| 1 | 2.908834000  | -2.268081000 | 1.764537000  |
| 1 | 3.055562000  | 1.952449000  | 0.953092000  |
| 8 | 3.355393000  | 1.505266000  | -1.636989000 |
| 1 | 3.387996000  | 0.086790000  | 2.593538000  |

**TS1-3**

E(electronic) = -1130.82080927  
 Zero-point correction= 0.299053 (Hartree/Particle)  
 Thermal correction to Energy= 0.315736  
 Thermal correction to Enthalpy= 0.316680  
 Thermal correction to Gibbs Free Energy= 0.254943  
 Sum of electronic and zero-point Energies= -1130.521757  
 Sum of electronic and thermal Energies= -1130.505073  
 Sum of electronic and thermal Enthalpies= -1130.504129  
 Sum of electronic and thermal Free Energies= -1130.565867

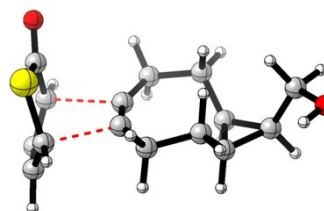

Frequency -411.3972

|   |              |              |              |
|---|--------------|--------------|--------------|
| 6 | 0.499882000  | 0.543959000  | 0.269928000  |
| 6 | 0.410441000  | -0.682248000 | 0.151256000  |
| 6 | -0.097263000 | 1.891332000  | 0.302017000  |
| 1 | 0.038494000  | 2.334860000  | 1.293630000  |
| 1 | 0.403651000  | 2.548840000  | -0.414497000 |
| 6 | -0.457634000 | -1.862379000 | -0.049758000 |
| 1 | -0.408777000 | -2.506994000 | 0.834531000  |
| 1 | -0.096667000 | -2.457211000 | -0.894075000 |
| 6 | -1.904918000 | -1.407590000 | -0.308396000 |
| 1 | -1.928797000 | -0.840762000 | -1.242054000 |
| 1 | -2.522530000 | -2.300165000 | -0.459016000 |
| 6 | -1.595981000 | 1.777565000  | -0.035318000 |
| 1 | -1.692034000 | 1.390819000  | -1.051527000 |
| 1 | -2.030424000 | 2.782375000  | -0.028937000 |
| 6 | -2.333782000 | 0.905895000  | 0.962293000  |
| 6 | -2.473198000 | -0.595849000 | 0.838833000  |
| 6 | -3.685830000 | 0.295709000  | 0.677436000  |
| 1 | -4.386368000 | 0.292332000  | 1.506241000  |

|    |              |              |              |
|----|--------------|--------------|--------------|
| 1  | -2.431603000 | -1.124626000 | 1.786958000  |
| 1  | -2.213436000 | 1.255541000  | 1.983898000  |
| 6  | -4.357683000 | 0.456021000  | -0.659856000 |
| 1  | -3.632926000 | 0.547854000  | -1.471604000 |
| 1  | -4.979123000 | 1.353557000  | -0.664764000 |
| 8  | -5.251174000 | -0.630799000 | -0.933049000 |
| 1  | -4.733946000 | -1.444630000 | -0.925446000 |
| 6  | 2.821770000  | -1.193108000 | 1.467354000  |
| 6  | 2.444124000  | -1.614288000 | 0.200938000  |
| 6  | 2.974311000  | 0.875697000  | -0.698933000 |
| 6  | 2.757278000  | 1.102643000  | 0.719870000  |
| 6  | 2.997831000  | 0.161037000  | 1.712070000  |
| 1  | 2.771071000  | -1.897769000 | 2.289131000  |
| 1  | 2.209348000  | -2.657661000 | 0.018779000  |
| 1  | 2.712586000  | 2.155760000  | 0.980532000  |
| 1  | 3.130807000  | 0.509295000  | 2.729636000  |
| 16 | 3.042116000  | -0.811578000 | -1.245384000 |
| 8  | 3.141267000  | 1.770482000  | -1.522411000 |

**TS1-4**

E(electronic) = -1130.81346697  
 Zero-point correction= 0.300093 (Hartree/Particle)  
 Thermal correction to Energy= 0.316640  
 Thermal correction to Enthalpy= 0.317584  
 Thermal correction to Gibbs Free Energy= 0.255577  
 Sum of electronic and zero-point Energies= -1130.513374  
 Sum of electronic and thermal Energies= -1130.496827  
 Sum of electronic and thermal Enthalpies= -1130.495883  
 Sum of electronic and thermal Free Energies= -1130.557890

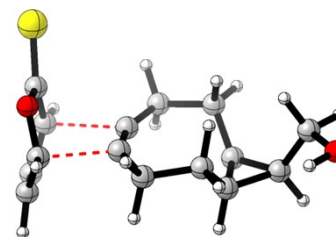

Frequency -402.8919

|   |              |              |              |    |              |              |              |
|---|--------------|--------------|--------------|----|--------------|--------------|--------------|
| 6 | -0.485515000 | -0.238745000 | 0.348463000  | 1  | 2.541177000  | 1.635965000  | 1.245544000  |
| 6 | -0.330369000 | 0.843204000  | -0.225786000 | 1  | 2.141012000  | -0.478554000 | 2.293528000  |
| 6 | -0.028235000 | -1.517462000 | 0.909880000  | 6  | 4.333312000  | -0.864302000 | -0.404626000 |
| 1 | -0.197134000 | -1.532680000 | 1.991058000  | 1  | 3.601511000  | -1.206197000 | -1.139540000 |
| 1 | -0.591457000 | -2.349503000 | 0.478787000  | 1  | 4.896019000  | -1.735728000 | -0.064663000 |
| 6 | 0.640577000  | 1.803815000  | -0.801432000 | 8  | 5.292506000  | -0.012324000 | -1.043160000 |
| 1 | 0.635965000  | 2.719263000  | -0.199321000 | 1  | 4.823762000  | 0.765812000  | -1.366696000 |
| 1 | 0.339949000  | 2.088798000  | -1.812882000 | 6  | -2.566191000 | 2.058021000  | 0.809210000  |
| 6 | 2.043625000  | 1.174666000  | -0.824650000 | 6  | -2.246000000 | 1.731051000  | -0.505052000 |
| 1 | 2.022288000  | 0.307517000  | -1.489063000 | 6  | -3.016477000 | -0.469134000 | -0.315611000 |
| 1 | 2.735124000  | 1.900972000  | -1.266455000 | 6  | -2.834166000 | -0.286350000 | 1.087147000  |
| 6 | 1.475190000  | -1.664461000 | 0.598698000  | 6  | -2.878748000 | 0.995311000  | 1.634393000  |
| 1 | 1.601955000  | -1.701605000 | -0.484755000 | 1  | -1.995072000 | 2.466134000  | -1.258072000 |
| 1 | 1.819180000  | -2.623378000 | 0.998776000  | 8  | -2.831820000 | 0.628463000  | -1.079604000 |
| 6 | 2.284978000  | -0.541880000 | 1.218513000  | 1  | -2.403845000 | 3.064864000  | 1.168627000  |
| 6 | 2.539783000  | 0.795626000  | 0.557025000  | 1  | -2.929036000 | -1.166562000 | 1.708706000  |
| 6 | 3.679065000  | -0.179413000 | 0.765472000  | 16 | -3.484095000 | -1.882946000 | -1.073995000 |
| 1 | 4.379895000  | 0.076325000  | 1.553493000  | 1  | -3.026244000 | 1.126903000  | 2.699106000  |

**TS1-5**

E(electronic) = -1453.77563074  
 Zero-point correction= 0.296541 (Hartree/Particle)  
 Thermal correction to Energy= 0.313743  
 Thermal correction to Enthalpy= 0.314687  
 Thermal correction to Gibbs Free Energy= 0.251152  
 Sum of electronic and zero-point Energies= -1453.479090  
 Sum of electronic and thermal Energies= -1453.461888  
 Sum of electronic and thermal Enthalpies= -1453.460943  
 Sum of electronic and thermal Free Energies= -1453.524479

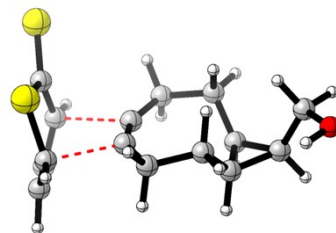

Frequency -406.7439

|   |              |              |              |    |              |              |              |
|---|--------------|--------------|--------------|----|--------------|--------------|--------------|
| 6 | 0.302166000  | 0.267652000  | 0.451692000  | 1  | -2.782945000 | -1.531999000 | 1.356673000  |
| 6 | 0.148271000  | -0.862578000 | -0.020630000 | 1  | -2.414362000 | 0.660759000  | 2.251769000  |
| 6 | -0.186959000 | 1.588403000  | 0.877647000  | 6  | -4.493613000 | 0.835910000  | -0.555027000 |
| 1 | -0.063576000 | 1.700061000  | 1.959603000  | 1  | -3.730680000 | 1.102306000  | -1.289540000 |
| 1 | 0.391648000  | 2.384883000  | 0.401192000  | 1  | -5.051772000 | 1.741532000  | -0.310047000 |
| 6 | -0.794743000 | -1.859551000 | -0.575810000 | 8  | -5.446373000 | -0.052564000 | -1.152481000 |
| 1 | -0.830854000 | -2.733118000 | 0.084171000  | 1  | -4.984488000 | -0.867202000 | -1.382782000 |
| 1 | -0.440774000 | -2.212826000 | -1.548741000 | 6  | 2.405547000  | -1.934144000 | 1.212103000  |
| 6 | -2.191167000 | -1.229754000 | -0.718504000 | 6  | 2.077137000  | -1.920940000 | -0.142352000 |
| 1 | -2.130944000 | -0.413536000 | -1.442357000 | 6  | 2.915936000  | 0.628034000  | -0.238805000 |
| 1 | -2.865614000 | -1.983681000 | -1.139922000 | 6  | 2.601373000  | 0.473712000  | 1.152965000  |
| 6 | -1.675566000 | 1.703971000  | 0.493172000  | 6  | 2.674365000  | -0.737166000 | 1.846597000  |
| 1 | -1.756545000 | 1.648035000  | -0.593897000 | 1  | 1.779551000  | -2.835929000 | -0.644074000 |
| 1 | -2.034869000 | 2.693093000  | 0.794362000  | 1  | 2.771473000  | -0.705713000 | 2.925319000  |
| 6 | -2.514486000 | 0.637366000  | 1.170187000  | 16 | 2.855053000  | -0.791128000 | -1.231818000 |
| 6 | -2.749101000 | -0.747342000 | 0.606062000  | 16 | 3.376906000  | 2.081721000  | -0.934801000 |
| 6 | -3.890920000 | 0.242836000  | 0.690163000  | 1  | 2.604659000  | 1.398553000  | 1.720343000  |
| 1 | -4.624545000 | 0.051634000  | 1.466636000  | 1  | 2.254846000  | -2.844286000 | 1.780278000  |

**6**

E(electronic) = -807.947475588  
 Zero-point correction= 0.308002 (Hartree/Particle)  
 Thermal correction to Energy= 0.322910  
 Thermal correction to Enthalpy= 0.323854  
 Thermal correction to Gibbs Free Energy= 0.266297  
 Sum of electronic and zero-point Energies= -807.639474  
 Sum of electronic and thermal Energies= -807.624566  
 Sum of electronic and thermal Enthalpies= -807.623622  
 Sum of electronic and thermal Free Energies= -807.681178

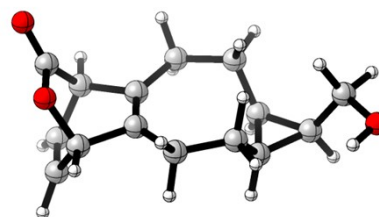

|   |              |              |              |   |              |              |              |
|---|--------------|--------------|--------------|---|--------------|--------------|--------------|
| 6 | 0.992342000  | 0.576918000  | 0.117297000  | 1 | -2.095764000 | -1.196411000 | 1.670036000  |
| 6 | 0.846501000  | -0.738560000 | -0.087172000 | 1 | -1.841667000 | 1.233147000  | 1.939724000  |
| 6 | 0.123134000  | 1.808541000  | 0.109049000  | 6 | -4.250880000 | 0.502842000  | -0.492395000 |
| 1 | 0.282078000  | 2.299237000  | 1.078643000  | 1 | -3.618315000 | 0.640853000  | -1.371878000 |
| 1 | 0.559912000  | 2.491796000  | -0.629033000 | 1 | -4.878898000 | 1.390125000  | -0.392492000 |
| 6 | -0.264290000 | -1.719491000 | -0.369639000 | 8 | -5.156804000 | -0.585133000 | -0.715738000 |
| 1 | -0.193983000 | -2.479532000 | 0.421169000  | 1 | -4.633979000 | -1.392966000 | -0.779022000 |
| 1 | 0.013593000  | -2.246547000 | -1.290033000 | 6 | 2.822804000  | -1.203477000 | 1.358323000  |
| 6 | -1.717950000 | -1.275609000 | -0.482598000 | 6 | 2.205102000  | -1.455273000 | 0.002622000  |
| 1 | -1.844632000 | -0.641955000 | -1.360636000 | 6 | 3.227000000  | 0.479171000  | -0.787826000 |
| 1 | -2.312042000 | -2.176525000 | -0.671558000 | 6 | 2.468224000  | 0.948276000  | 0.433802000  |
| 6 | -1.375651000 | 1.699736000  | -0.139301000 | 6 | 2.989435000  | 0.094971000  | 1.577189000  |
| 1 | -1.557296000 | 1.299099000  | -1.136387000 | 1 | 3.094904000  | -2.013864000 | 2.020539000  |
| 1 | -1.779593000 | 2.717107000  | -0.138698000 | 1 | 2.151918000  | -2.501101000 | -0.280569000 |
| 6 | -2.062329000 | 0.887109000  | 0.934349000  | 1 | 2.608793000  | 2.015366000  | 0.572934000  |
| 6 | -2.221681000 | -0.600498000 | 0.771202000  | 1 | 3.454594000  | 0.549949000  | 2.441307000  |
| 6 | -3.439870000 | 0.296242000  | 0.757798000  | 8 | 3.087041000  | -0.834658000 | -0.996771000 |
| 1 | -4.046377000 | 0.263168000  | 1.657036000  | 8 | 3.892941000  | 1.162748000  | -1.533401000 |

7

E(electronic) = -1130.90974296  
 Zero-point correction= 0.304545 (Hartree/Particle)  
 Thermal correction to Energy= 0.320147  
 Thermal correction to Enthalpy= 0.321091  
 Thermal correction to Gibbs Free Energy= 0.261984  
 Sum of electronic and zero-point Energies= -1130.605198  
 Sum of electronic and thermal Energies= -1130.589596  
 Sum of electronic and thermal Enthalpies= -1130.588652  
 Sum of electronic and thermal Free Energies= -1130.647759

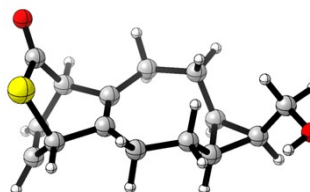

|   |              |              |              |    |              |              |              |
|---|--------------|--------------|--------------|----|--------------|--------------|--------------|
| 6 | 0.699788000  | 0.544370000  | 0.360674000  | 1  | -2.273124000 | -1.581822000 | 1.606031000  |
| 6 | 0.667291000  | -0.764053000 | 0.066388000  | 1  | -2.232153000 | 0.825493000  | 2.115615000  |
| 6 | -0.276603000 | 1.698077000  | 0.411014000  | 6  | -4.711087000 | 0.109126000  | -0.294605000 |
| 1 | -0.180474000 | 2.128571000  | 1.416704000  | 1  | -5.379262000 | 0.926800000  | -0.000799000 |
| 1 | 0.127462000  | 2.465170000  | -0.261794000 | 1  | -5.325444000 | -0.790800000 | -0.416039000 |
| 6 | -0.369167000 | -1.778402000 | -0.358260000 | 8  | -4.087922000 | 0.430905000  | -1.536679000 |
| 1 | -0.293833000 | -2.602611000 | 0.364060000  | 1  | -4.788438000 | 0.532448000  | -2.190033000 |
| 1 | -0.005602000 | -2.201312000 | -1.304294000 | 6  | 2.730845000  | -1.129279000 | 1.444962000  |
| 6 | -1.838508000 | -1.411658000 | -0.522831000 | 6  | 2.047953000  | -1.436152000 | 0.140172000  |
| 1 | -1.962451000 | -0.691104000 | -1.327664000 | 6  | 2.936266000  | 0.950815000  | -0.588965000 |
| 1 | -2.361692000 | -2.318344000 | -0.845182000 | 6  | 2.119397000  | 1.048849000  | 0.707869000  |
| 6 | -1.758736000 | 1.515978000  | 0.106087000  | 6  | 2.772945000  | 0.163871000  | 1.741603000  |
| 1 | -1.900451000 | 1.204602000  | -0.925963000 | 1  | 3.152553000  | -1.926217000 | 2.044177000  |
| 1 | -2.225014000 | 2.503400000  | 0.191138000  | 1  | 1.994280000  | -2.500434000 | -0.073578000 |
| 6 | -2.418175000 | 0.565010000  | 1.076972000  | 1  | 2.110073000  | 2.097776000  | 0.995933000  |
| 6 | -2.446849000 | -0.914192000 | 0.766245000  | 1  | 3.242687000  | 0.595486000  | 2.615550000  |
| 6 | -3.732658000 | -0.131401000 | 0.831083000  | 16 | 3.082294000  | -0.701910000 | -1.227398000 |
| 1 | -4.295113000 | -0.311743000 | 1.743084000  | 8  | 3.430806000  | 1.905278000  | -1.143198000 |

8

E(electronic) = -1130.89052599  
 Zero-point correction= 0.305249 (Hartree/Particle)  
 Thermal correction to Energy= 0.320693  
 Thermal correction to Enthalpy= 0.321637  
 Thermal correction to Gibbs Free Energy= 0.262260  
 Sum of electronic and zero-point Energies= -1130.585277  
 Sum of electronic and thermal Energies= -1130.569833  
 Sum of electronic and thermal Enthalpies= -1130.568889  
 Sum of electronic and thermal Free Energies= -1130.628266

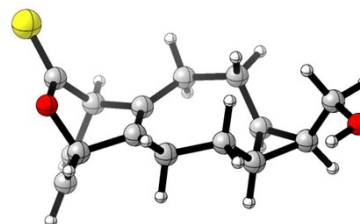

|   |              |              |              |   |              |              |              |
|---|--------------|--------------|--------------|---|--------------|--------------|--------------|
| 6 | -0.753172000 | -0.328849000 | 0.407859000  | 1 | 2.530478000  | 1.573454000  | 1.242084000  |
| 6 | -0.545510000 | 0.858826000  | -0.174045000 | 1 | 2.149820000  | -0.654637000 | 2.203423000  |
| 6 | 0.038659000  | -1.575431000 | 0.709614000  | 6 | 4.430226000  | -0.826678000 | -0.445277000 |
| 1 | -0.083810000 | -1.762492000 | 1.784670000  | 1 | 3.732914000  | -1.170374000 | -1.212232000 |
| 1 | -0.486473000 | -2.402228000 | 0.215888000  | 1 | 5.017019000  | -1.688101000 | -0.120801000 |
| 6 | 0.598502000  | 1.638613000  | -0.774536000 | 8 | 5.373411000  | 0.083153000  | -1.025560000 |
| 1 | 0.623373000  | 2.592356000  | -0.229075000 | 1 | 4.887638000  | 0.865472000  | -1.311781000 |
| 1 | 0.292237000  | 1.905202000  | -1.792816000 | 6 | -2.414812000 | 1.854630000  | 1.145104000  |
| 6 | 2.014831000  | 1.077265000  | -0.823918000 | 6 | -1.852814000 | 1.662521000  | -0.240250000 |
| 1 | 2.051864000  | 0.218472000  | -1.494665000 | 6 | -3.021870000 | -0.347001000 | -0.402647000 |
| 1 | 2.644373000  | 1.846980000  | -1.283787000 | 6 | -2.226239000 | -0.491956000 | 0.876378000  |
| 6 | 1.521037000  | -1.652337000 | 0.368992000  | 6 | -2.639241000 | 0.688084000  | 1.736595000  |
| 1 | 1.657077000  | -1.564620000 | -0.708708000 | 1 | -2.619344000 | 2.838293000  | 1.544784000  |
| 1 | 1.864919000  | -2.655313000 | 0.641100000  | 1 | -1.769546000 | 2.570380000  | -0.827698000 |
| 6 | 2.323520000  | -0.623201000 | 1.131950000  | 1 | -2.407315000 | -1.456732000 | 1.336491000  |

|   |             |              |             |    |              |              |              |
|---|-------------|--------------|-------------|----|--------------|--------------|--------------|
| 6 | 2.559780000 | 0.742157000  | 0.544219000 | 1  | -3.094009000 | 0.531625000  | 2.705696000  |
| 6 | 3.718920000 | -0.211928000 | 0.729393000 | 8  | -2.825131000 | 0.824295000  | -0.977829000 |
| 1 | 4.384888000 | 0.027279000  | 1.552056000 | 16 | -4.017078000 | -1.478932000 | -1.059632000 |

### 9

E(electronic) = -1453.85960882  
 Zero-point correction= 0.301967 (Hartree/Particle)  
 Thermal correction to Energy= 0.318058  
 Thermal correction to Enthalpy= 0.319003  
 Thermal correction to Gibbs Free Energy= 0.258077  
 Sum of electronic and zero-point Energies= -1453.557642  
 Sum of electronic and thermal Energies= -1453.541550  
 Sum of electronic and thermal Enthalpies= -1453.540606  
 Sum of electronic and thermal Free Energies= -1453.601532

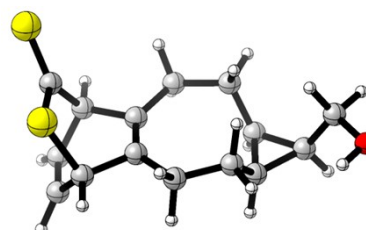

|   |              |              |              |    |              |              |              |
|---|--------------|--------------|--------------|----|--------------|--------------|--------------|
| 6 | 0.586251000  | 0.348068000  | 0.495795000  | 1  | -2.775542000 | -1.441409000 | 1.398875000  |
| 6 | 0.384072000  | -0.901925000 | 0.056597000  | 1  | -2.416392000 | 0.868885000  | 2.165095000  |
| 6 | -0.224399000 | 1.612883000  | 0.659008000  | 6  | -4.577975000 | 0.793934000  | -0.590274000 |
| 1 | -0.132431000 | 1.897057000  | 1.715790000  | 1  | -3.845193000 | 1.059722000  | -1.355023000 |
| 1 | 0.316417000  | 2.393671000  | 0.109933000  | 1  | -5.175210000 | 1.682848000  | -0.378759000 |
| 6 | -0.761841000 | -1.714194000 | -0.501883000 | 8  | -5.497362000 | -0.168877000 | -1.121554000 |
| 1 | -0.835141000 | -2.605602000 | 0.135251000  | 1  | -4.999425000 | -0.970740000 | -1.319217000 |
| 1 | -0.418149000 | -2.091844000 | -1.473509000 | 6  | 2.321055000  | -1.703407000 | 1.435588000  |
| 6 | -2.160939000 | -1.136852000 | -0.677077000 | 6  | 1.657094000  | -1.761627000 | 0.088189000  |
| 1 | -2.146258000 | -0.339619000 | -1.420489000 | 6  | 2.897911000  | 0.540690000  | -0.346666000 |
| 1 | -2.780623000 | -1.935094000 | -1.100822000 | 6  | 2.051552000  | 0.609771000  | 0.928794000  |
| 6 | -1.696368000 | 1.679041000  | 0.271964000  | 6  | 2.528995000  | -0.468688000 | 1.875268000  |
| 1 | -1.807349000 | 1.504896000  | -0.797817000 | 1  | 1.479372000  | -2.774319000 | -0.264114000 |
| 1 | -2.027615000 | 2.707426000  | 0.448931000  | 1  | 3.018307000  | -0.202444000 | -2.803097000 |
| 6 | -2.542740000 | 0.735533000  | 1.094855000  | 16 | 2.841378000  | -0.996909000 | -1.137594000 |
| 6 | -2.766088000 | -0.676921000 | 0.627933000  | 16 | 3.767762000  | 1.806584000  | -0.925018000 |
| 6 | -3.923389000 | 0.295811000  | 0.669843000  | 1  | 2.159847000  | 1.605029000  | 1.351087000  |
| 1 | -4.627069000 | 0.138693000  | 1.480809000  | 1  | 2.605962000  | -2.613626000 | 1.947507000  |

### TS2-2

E(electronic) = -807.916147927  
 Zero-point correction= 0.305068 (Hartree/Particle)  
 Thermal correction to Energy= 0.320271  
 Thermal correction to Enthalpy= 0.321215  
 Thermal correction to Gibbs Free Energy= 0.262861  
 Sum of electronic and zero-point Energies= -807.611080  
 Sum of electronic and thermal Energies= -807.595877  
 Sum of electronic and thermal Enthalpies= -807.594932  
 Sum of electronic and thermal Free Energies= -807.653287

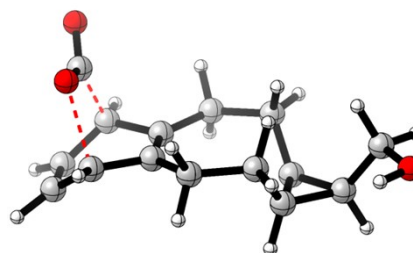

Frequency -422.1890

|   |              |              |              |   |              |              |              |
|---|--------------|--------------|--------------|---|--------------|--------------|--------------|
| 6 | -1.031593000 | -0.435382000 | 0.360577000  | 1 | 2.196386000  | 1.389553000  | 1.555363000  |
| 6 | -0.843180000 | 0.874653000  | 0.037596000  | 1 | 1.879985000  | -0.993802000 | 2.105155000  |
| 6 | -0.171532000 | -1.676782000 | 0.400389000  | 6 | 4.223451000  | -0.609948000 | -0.470395000 |
| 1 | -0.315832000 | -2.090892000 | 1.406643000  | 1 | 3.559959000  | -0.813581000 | -1.313670000 |
| 1 | -0.658248000 | -2.396931000 | -0.268915000 | 1 | 4.823028000  | -1.505185000 | -0.295261000 |
| 6 | 0.305836000  | 1.742264000  | -0.455672000 | 8 | 5.158620000  | 0.414159000  | -0.831937000 |
| 1 | 0.324160000  | 2.619479000  | 0.201349000  | 1 | 4.664250000  | 1.233668000  | -0.950455000 |
| 1 | -0.009753000 | 2.122756000  | -1.434170000 | 6 | -3.064625000 | 1.447713000  | 1.080132000  |
| 6 | 1.732901000  | 1.223798000  | -0.577238000 | 6 | -2.076602000 | 1.646271000  | 0.065634000  |
| 1 | 1.796591000  | 0.483442000  | -1.373731000 | 6 | -3.108933000 | -0.657525000 | -0.901727000 |
| 1 | 2.345236000  | 2.071426000  | -0.903820000 | 6 | -2.467463000 | -0.801045000 | 0.613649000  |
| 6 | 1.320704000  | -1.654790000 | 0.102304000  | 6 | -3.263973000 | 0.153380000  | 1.391288000  |
| 1 | 1.490691000  | -1.382000000 | -0.938042000 | 1 | -3.674634000 | 2.269742000  | 1.429431000  |
| 1 | 1.676624000  | -2.684441000 | 0.207862000  | 1 | -2.073252000 | 2.594299000  | -0.463662000 |
| 6 | 2.074130000  | -0.763872000 | 1.061923000  | 1 | -2.599477000 | -1.836964000 | 0.906306000  |
| 6 | 2.271361000  | 0.689994000  | 0.728556000  | 1 | -4.058795000 | -0.199276000 | 2.036784000  |
| 6 | 3.460866000  | -0.242887000 | 0.773697000  | 8 | -3.056405000 | 0.489262000  | -1.389185000 |
| 1 | 4.098961000  | -0.131333000 | 1.644266000  | 8 | -3.556462000 | -1.699047000 | -1.380841000 |

**TS2-3**

E(electronic) = -1130.87556349  
 Zero-point correction= 0.301922 (Hartree/Particle)  
 Thermal correction to Energy= 0.318048  
 Thermal correction to Enthalpy= 0.318993  
 Thermal correction to Gibbs Free Energy= 0.257979  
 Sum of electronic and zero-point Energies= -1130.573641  
 Sum of electronic and thermal Energies= -1130.557515  
 Sum of electronic and thermal Enthalpies= -1130.556571  
 Sum of electronic and thermal Free Energies= -1130.617585

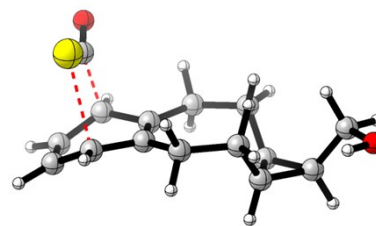

Frequency -462.9724

|   |              |              |              |    |              |              |              |
|---|--------------|--------------|--------------|----|--------------|--------------|--------------|
| 6 | 0.833504000  | 0.496804000  | 0.541917000  | 1  | -2.493018000 | -1.234328000 | 1.696784000  |
| 6 | 0.669986000  | -0.855198000 | 0.369798000  | 1  | -2.222357000 | 1.198204000  | 2.026490000  |
| 6 | -0.053983000 | 1.718479000  | 0.398981000  | 6  | -4.373994000 | 0.536065000  | -0.657319000 |
| 1 | 0.017042000  | 2.236598000  | 1.363481000  | 1  | -3.651395000 | 0.696516000  | -1.459936000 |
| 1 | 0.464104000  | 2.377927000  | -0.308391000 | 1  | -5.011667000 | 1.420311000  | -0.603118000 |
| 6 | -0.454778000 | -1.760326000 | -0.117940000 | 8  | -5.246320000 | -0.545720000 | -1.007760000 |
| 1 | -0.526228000 | -2.570325000 | 0.616137000  | 1  | -4.711259000 | -1.345927000 | -1.065401000 |
| 1 | -0.067287000 | -2.233658000 | -1.029266000 | 6  | 2.912054000  | -1.253778000 | 1.445974000  |
| 6 | -1.869894000 | -1.272924000 | -0.400293000 | 6  | 1.867951000  | -1.637781000 | 0.567704000  |
| 1 | -1.879181000 | -0.619366000 | -1.271852000 | 6  | 2.948439000  | 0.832560000  | -0.840552000 |
| 1 | -2.450020000 | -2.158221000 | -0.683517000 | 6  | 2.216216000  | 0.924819000  | 0.822471000  |
| 6 | -1.523677000 | 1.653215000  | 0.008926000  | 6  | 3.083964000  | 0.080530000  | 1.601905000  |
| 1 | -1.625147000 | 1.275927000  | -1.007069000 | 1  | 3.589323000  | -1.996205000 | 1.847781000  |
| 1 | -1.885332000 | 2.686156000  | -0.014993000 | 1  | 1.815520000  | -2.683048000 | 0.278346000  |
| 6 | -2.341288000 | 0.860722000  | 1.001408000  | 1  | 2.322504000  | 1.988209000  | 1.006528000  |
| 6 | -2.509314000 | -0.620375000 | 0.801530000  | 1  | 3.910108000  | 0.514257000  | 2.151966000  |
| 6 | -3.702492000 | 0.298779000  | 0.668372000  | 16 | 3.029120000  | -0.687440000 | -1.545460000 |
| 1 | -4.400389000 | 0.265062000  | 1.498583000  | 8  | 3.261644000  | 1.942144000  | -1.191301000 |

**TS2-4**

E(electronic) = -1130.86609309  
 Zero-point correction= 0.302722 (Hartree/Particle)  
 Thermal correction to Energy= 0.318391  
 Thermal correction to Enthalpy= 0.319335  
 Thermal correction to Gibbs Free Energy= 0.259369  
 Sum of electronic and zero-point Energies= -1130.563371  
 Sum of electronic and thermal Energies= -1130.547702  
 Sum of electronic and thermal Enthalpies= -1130.546758  
 Sum of electronic and thermal Free Energies= -1130.606725

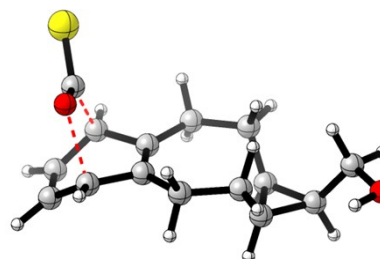

Frequency -367.2682

|   |              |              |              |    |              |              |              |
|---|--------------|--------------|--------------|----|--------------|--------------|--------------|
| 6 | -0.795657000 | -0.123359000 | 0.538593000  | 1  | 2.606538000  | 1.651221000  | 1.163381000  |
| 6 | -0.526632000 | 1.052141000  | -0.094149000 | 1  | 2.138123000  | -0.501367000 | 2.271269000  |
| 6 | -0.032822000 | -1.393135000 | 0.838080000  | 6  | 4.385852000  | -0.928446000 | -0.381367000 |
| 1 | -0.157995000 | -1.555619000 | 1.916267000  | 1  | 3.670268000  | -1.285257000 | -1.125263000 |
| 1 | -0.603416000 | -2.203018000 | 0.366373000  | 1  | 4.938900000  | -1.793743000 | -0.011309000 |
| 6 | 0.656064000  | 1.674271000  | -0.822338000 | 8  | 5.361440000  | -0.091257000 | -1.014866000 |
| 1 | 0.769151000  | 2.680085000  | -0.401859000 | 1  | 4.908485000  | 0.700193000  | -1.328770000 |
| 1 | 0.319611000  | 1.831082000  | -1.853936000 | 6  | -2.630510000 | 2.048127000  | 0.869700000  |
| 6 | 2.036202000  | 1.030209000  | -0.855990000 | 6  | -1.691201000 | 1.920518000  | -0.201784000 |
| 1 | 2.014635000  | 0.123933000  | -1.459893000 | 6  | -2.965603000 | -0.422475000 | -0.554847000 |
| 1 | 2.691229000  | 1.729386000  | -1.387268000 | 6  | -2.235185000 | -0.291371000 | 0.931795000  |
| 6 | 1.440688000  | -1.564707000 | 0.498196000  | 6  | -2.906856000 | 0.885905000  | 1.490080000  |
| 1 | 1.578878000  | -1.554694000 | -0.581779000 | 1  | -3.155779000 | 2.978522000  | 1.038741000  |
| 1 | 1.725584000  | -2.567600000 | 0.831470000  | 1  | -1.637881000 | 2.723114000  | -0.931236000 |
| 6 | 2.301855000  | -0.539699000 | 1.198600000  | 1  | -2.429097000 | -1.212259000 | 1.467802000  |
| 6 | 2.591994000  | 0.773714000  | 0.524299000  | 1  | -3.686222000 | 0.764244000  | 2.232088000  |
| 6 | 3.709315000  | -0.217776000 | 0.759240000  | 8  | -2.829681000 | 0.561774000  | -1.281262000 |
| 1 | 4.391914000  | 0.042754000  | 1.561503000  | 16 | -3.772627000 | -1.858663000 | -0.864200000 |

**TS2-5**

E(electronic) = -1453.82525959  
 Zero-point correction= 0.299108 (Hartree/Particle)  
 Thermal correction to Energy= 0.315913  
 Thermal correction to Enthalpy= 0.316858  
 Thermal correction to Gibbs Free Energy= 0.253659  
 Sum of electronic and zero-point Energies= -1453.526152  
 Sum of electronic and thermal Energies= -1453.509346  
 Sum of electronic and thermal Enthalpies= -1453.508402

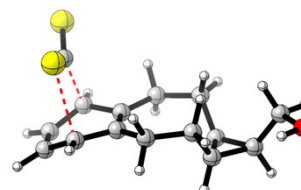

Sum of electronic and thermal Free Energies= -1453.571600

Frequency -447.0591

|   |              |              |              |    |              |              |              |
|---|--------------|--------------|--------------|----|--------------|--------------|--------------|
| 6 | 0.635699000  | 0.133787000  | 0.693515000  | 1  | -2.852928000 | -1.525689000 | 1.333873000  |
| 6 | 0.369783000  | -1.119726000 | 0.196489000  | 1  | -2.399926000 | 0.726653000  | 2.240704000  |
| 6 | -0.143818000 | 1.430065000  | 0.819648000  | 6  | -4.507592000 | 0.907128000  | -0.551816000 |
| 1 | -0.068284000 | 1.707881000  | 1.878198000  | 1  | -3.748609000 | 1.173377000  | -1.290675000 |
| 1 | 0.452386000  | 2.184744000  | 0.290950000  | 1  | -5.059656000 | 1.814609000  | -0.300327000 |
| 6 | -0.803272000 | -1.771561000 | -0.528591000 | 8  | -5.468193000 | 0.025376000  | -1.146501000 |
| 1 | -0.965420000 | -2.730491000 | -0.024787000 | 1  | -5.013807000 | -0.795493000 | -1.369681000 |
| 1 | -0.418854000 | -2.032408000 | -1.522791000 | 6  | 2.530402000  | -1.956844000 | 1.182435000  |
| 6 | -2.166710000 | -1.114948000 | -0.703344000 | 6  | 1.479825000  | -2.039902000 | 0.238599000  |
| 1 | -2.100596000 | -0.273973000 | -1.392419000 | 6  | 2.870544000  | 0.601069000  | -0.545655000 |
| 1 | -2.803894000 | -1.856494000 | -1.197886000 | 6  | 2.024674000  | 0.359366000  | 1.115329000  |
| 6 | -1.598654000 | 1.586019000  | 0.401031000  | 6  | 2.801026000  | -0.717575000 | 1.661824000  |
| 1 | -1.693226000 | 1.469459000  | -0.677115000 | 1  | 3.140729000  | -2.824736000 | 1.396718000  |
| 1 | -1.875786000 | 2.622597000  | 0.617930000  | 1  | 1.345521000  | -2.984638000 | -0.279772000 |
| 6 | -2.511404000 | 0.654371000  | 1.163110000  | 1  | 2.203908000  | 1.329482000  | 1.560883000  |
| 6 | -2.791241000 | -0.717081000 | 0.612095000  | 1  | 3.644507000  | -0.500499000 | 2.305976000  |
| 6 | -3.901315000 | 0.307029000  | 0.687825000  | 16 | 2.801041000  | -0.683507000 | -1.547781000 |
| 1 | -4.627113000 | 0.138663000  | 1.476741000  | 16 | 3.502640000  | 2.115179000  | -0.610311000 |

### 10

E(electronic) = -619.421376131

Zero-point correction= 0.291798 (Hartree/Particle)

Thermal correction to Energy= 0.304988

Thermal correction to Enthalpy= 0.305932

Thermal correction to Gibbs Free Energy= 0.252181

Sum of electronic and zero-point Energies= -619.129578

Sum of electronic and thermal Energies= -619.116389

Sum of electronic and thermal Enthalpies= -619.115444

Sum of electronic and thermal Free Energies= -619.169195

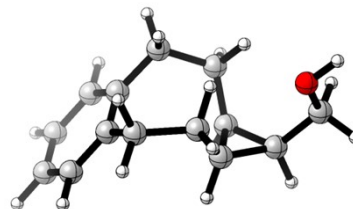

|   |              |              |              |   |              |              |              |
|---|--------------|--------------|--------------|---|--------------|--------------|--------------|
| 6 | -1.441489000 | -0.578446000 | -0.646687000 | 1 | 0.112981000  | -0.523393000 | -2.109278000 |
| 6 | -1.498733000 | 0.806433000  | -0.398906000 | 1 | -0.513802000 | 1.876549000  | -1.973482000 |
| 6 | -0.257027000 | -1.202055000 | -1.339064000 | 1 | 1.474748000  | 0.813379000  | -1.295130000 |
| 6 | -2.592456000 | 1.311316000  | 0.310443000  | 1 | 1.602461000  | 2.377934000  | -0.535976000 |
| 6 | -2.472976000 | -1.399104000 | -0.185605000 | 1 | 2.409737000  | -0.020750000 | 2.395032000  |
| 6 | -3.558060000 | -0.881348000 | 0.516350000  | 1 | 1.837242000  | -1.536224000 | -0.905635000 |
| 6 | -0.436728000 | 1.778000000  | -0.884724000 | 1 | 0.759052000  | -2.611304000 | -0.045260000 |
| 6 | 1.031929000  | 1.444707000  | -0.529628000 | 1 | 0.632045000  | 1.325939000  | 1.609025000  |
| 6 | 0.892170000  | -1.571997000 | -0.357063000 | 1 | 0.349578000  | -1.084933000 | 1.717191000  |
| 6 | 0.972130000  | -0.726311000 | 0.904206000  | 1 | 3.747381000  | -1.436659000 | 0.536653000  |
| 6 | 1.132376000  | 0.770521000  | 0.819786000  | 1 | 4.400469000  | 0.031326000  | 1.273714000  |
| 6 | 2.276223000  | -0.083398000 | 1.320345000  | 1 | 4.555629000  | 0.017754000  | -1.016683000 |
| 6 | -3.616597000 | 0.484915000  | 0.766840000  | 1 | -4.451552000 | 0.908278000  | 1.313490000  |
| 6 | 3.600154000  | -0.354490000 | 0.635032000  | 1 | -2.640213000 | 2.377459000  | 0.509261000  |
| 8 | 3.696299000  | 0.256213000  | -0.652362000 | 1 | -2.417946000 | -2.465629000 | -0.383226000 |
| 1 | -0.580335000 | -2.110566000 | -1.851831000 | 1 | -4.347135000 | -1.538906000 | 0.862974000  |
|   |              |              |              | 1 | -0.686229000 | 2.757590000  | -0.469887000 |

### CO<sub>2</sub>

E(electronic) = -188.571432072

Zero-point correction= 0.011731 (Hartree/Particle)

Thermal correction to Energy= 0.014344

Thermal correction to Enthalpy= 0.015288

Thermal correction to Gibbs Free Energy= -0.009605

Sum of electronic and zero-point Energies= -188.559701

Sum of electronic and thermal Energies= -188.557088

Sum of electronic and thermal Enthalpies= -188.556144

Sum of electronic and thermal Free Energies= -188.581037

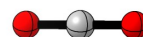

|   |             |             |              |
|---|-------------|-------------|--------------|
| 6 | 0.000000000 | 0.000000000 | 0.000018000  |
| 8 | 0.000000000 | 0.000000000 | -1.155116000 |
| 8 | 0.000000000 | 0.000000000 | 1.155103000  |

### COS

E(electronic) = -511.517209778

Zero-point correction= 0.009150 (Hartree/Particle)

Thermal correction to Energy= 0.011996

Thermal correction to Enthalpy= 0.012940

Thermal correction to Gibbs Free Energy= -0.013352

Sum of electronic and zero-point Energies= -511.508060

Sum of electronic and thermal Energies= -511.505214

Sum of electronic and thermal Enthalpies= -511.504270

Sum of electronic and thermal Free Energies= -511.530562

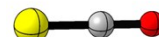



|    |             |             |              |
|----|-------------|-------------|--------------|
| 6  | 0.000000000 | 0.000000000 | -0.527079000 |
| 8  | 0.000000000 | 0.000000000 | -1.676933000 |
| 16 | 0.000000000 | 0.000000000 | 1.036121000  |

**CS<sub>2</sub>**

E(electronic) = -834.462963952  
 Zero-point correction= 0.006914 (Hartree/Particle)  
 Thermal correction to Energy= 0.010005  
 Thermal correction to Enthalpy= 0.010949  
 Thermal correction to Gibbs Free Energy= -0.016657  
 Sum of electronic and zero-point Energies= -834.456050  
 Sum of electronic and thermal Energies= -834.452959  
 Sum of electronic and thermal Enthalpies= -834.452015  
 Sum of electronic and thermal Free Energies= -834.479621

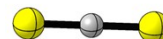

|    |             |             |              |
|----|-------------|-------------|--------------|
| 6  | 0.000000000 | 0.000000000 | 0.000069000  |
| 16 | 0.000000000 | 0.000000000 | -1.552032000 |
| 16 | 0.000000000 | 0.000000000 | 1.552007000  |

**PyrS2**

E(electronic) = -1121.99979941  
 Zero-point correction= 0.164369 (Hartree/Particle)  
 Thermal correction to Energy= 0.179093  
 Thermal correction to Enthalpy= 0.180037  
 Thermal correction to Gibbs Free Energy= 0.119776  
 Sum of electronic and zero-point Energies= -1121.835430  
 Sum of electronic and thermal Energies= -1121.820706  
 Sum of electronic and thermal Enthalpies= -1121.819762  
 Sum of electronic and thermal Free Energies= -1121.880024

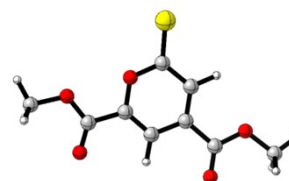

|    |              |              |              |   |              |              |              |
|----|--------------|--------------|--------------|---|--------------|--------------|--------------|
| 6  | 1.099629000  | -0.423318000 | 0.000408000  | 1 | -5.047089000 | -1.305427000 | 0.894168000  |
| 6  | -1.159039000 | 1.110887000  | -0.000143000 | 1 | -5.619132000 | 0.135793000  | -0.000054000 |
| 6  | -0.085951000 | -1.052574000 | 0.000255000  | 1 | -2.029522000 | 1.751398000  | -0.000498000 |
| 6  | -1.263251000 | -0.240927000 | -0.000062000 | 6 | 2.403219000  | -1.152496000 | 0.000708000  |
| 8  | 1.211831000  | 0.923824000  | 0.000359000  | 8 | 2.460725000  | -2.358717000 | 0.000094000  |
| 6  | 0.130540000  | 1.746613000  | 0.000263000  | 8 | 3.440415000  | -0.339313000 | 0.000276000  |
| 16 | 0.386580000  | 3.373735000  | -0.000366000 | 6 | 4.735236000  | -0.972527000 | -0.000233000 |
| 6  | -2.591408000 | -0.936302000 | -0.000398000 | 1 | 4.844246000  | -1.584214000 | 0.894339000  |
| 8  | -2.692743000 | -2.140333000 | -0.000005000 | 1 | 4.843534000  | -1.584253000 | -0.894865000 |
| 8  | -3.611805000 | -0.097456000 | -0.000290000 | 1 | 5.453055000  | -0.158047000 | -0.000536000 |
| 6  | -4.921582000 | -0.696266000 | -0.000138000 | 1 | -0.134812000 | -2.132159000 | 0.000299000  |
| 1  | -5.047291000 | -1.305417000 | -0.894423000 |   |              |              |              |

**endo-BCN**

E(electronic) = -464.544721303  
 Zero-point correction= 0.220331 (Hartree/Particle)  
 Thermal correction to Energy= 0.230877  
 Thermal correction to Enthalpy= 0.231822  
 Thermal correction to Gibbs Free Energy= 0.184815  
 Sum of electronic and zero-point Energies= -464.324390  
 Sum of electronic and thermal Energies= -464.313844  
 Sum of electronic and thermal Enthalpies= -464.312900  
 Sum of electronic and thermal Free Energies= -464.359906

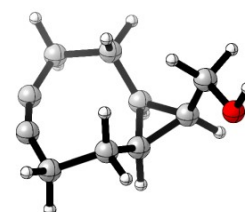

|   |              |              |              |   |              |              |              |
|---|--------------|--------------|--------------|---|--------------|--------------|--------------|
| 1 | -1.448805000 | 2.670636000  | 0.900490000  | 1 | -0.372191000 | -2.711855000 | -0.370603000 |
| 6 | -1.318051000 | 2.168089000  | -0.061532000 | 1 | -0.369849000 | -1.220662000 | -1.309872000 |
| 1 | -1.472811000 | 2.910939000  | -0.846068000 | 6 | 1.463320000  | -0.528830000 | 0.774210000  |
| 6 | -2.214757000 | -1.577420000 | -0.259816000 | 6 | -2.232290000 | 1.028638000  | -0.184218000 |
| 1 | -2.677157000 | -2.087544000 | -1.106723000 | 1 | -2.570515000 | -2.061843000 | 0.653403000  |
| 6 | 0.017040000  | -0.965713000 | 0.809600000  | 6 | -2.514402000 | -0.142280000 | -0.242571000 |
| 1 | -0.285277000 | -1.388088000 | 1.764164000  | 6 | 2.280461000  | -0.633727000 | -0.485499000 |
| 6 | 0.367245000  | 0.508481000  | 0.900002000  | 1 | 2.764142000  | -1.610797000 | -0.541724000 |
| 1 | 0.257839000  | 0.910768000  | 1.903508000  | 1 | 1.666231000  | -0.513784000 | -1.380473000 |
| 6 | 0.102598000  | 1.557001000  | -0.167627000 | 8 | 3.346335000  | 0.323663000  | -0.502438000 |
| 1 | 0.837842000  | 2.363088000  | -0.067095000 | 1 | 2.042828000  | -0.721654000 | 1.671336000  |
| 1 | 0.216282000  | 1.135016000  | -1.169059000 | 1 | 2.953695000  | 1.202208000  | -0.441979000 |
| 6 | -0.669987000 | -1.658528000 | -0.355849000 |   |              |              |              |

**exo-BCN**

E(electronic) = -464.547800739  
 Zero-point correction= 0.219994 (Hartree/Particle)  
 Thermal correction to Energy= 0.230579  
 Thermal correction to Enthalpy= 0.231524  
 Thermal correction to Gibbs Free Energy= 0.184373  
 Sum of electronic and zero-point Energies= -464.327806  
 Sum of electronic and thermal Energies= -464.317221  
 Sum of electronic and thermal Enthalpies= -464.316277  
 Sum of electronic and thermal Free Energies= -464.363428

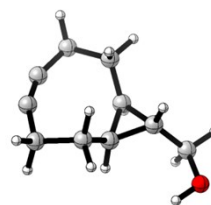

|   |              |              |              |   |              |              |              |
|---|--------------|--------------|--------------|---|--------------|--------------|--------------|
| 6 | 2.615455000  | -0.248917000 | -0.299021000 | 1 | 0.561709000  | -2.692505000 | 0.712316000  |
| 6 | 2.391462000  | 0.935879000  | -0.290778000 | 6 | -0.172589000 | -0.941622000 | -0.272239000 |
| 6 | 2.277703000  | -1.663640000 | -0.117117000 | 6 | -0.457328000 | 0.550914000  | -0.265022000 |
| 1 | 2.241167000  | -2.183432000 | -1.078187000 | 6 | -1.429429000 | -0.414170000 | 0.366128000  |
| 1 | 3.000970000  | -2.184912000 | 0.512658000  | 1 | -0.773494000 | 0.924613000  | -1.237471000 |
| 6 | 1.556193000  | 2.124476000  | -0.094743000 | 1 | -0.325313000 | -1.394820000 | -1.249286000 |
| 1 | 1.331450000  | 2.605687000  | -1.050327000 | 6 | -2.763594000 | -0.645425000 | -0.282945000 |
| 1 | 2.036191000  | 2.868082000  | 0.544106000  | 1 | -2.630817000 | -0.750466000 | -1.365617000 |
| 6 | 0.259023000  | 1.596973000  | 0.568449000  | 1 | -3.233989000 | -1.555875000 | 0.093222000  |
| 1 | 0.513762000  | 1.184668000  | 1.548662000  | 8 | -3.687973000 | 0.411225000  | -0.005967000 |
| 1 | -0.418978000 | 2.440004000  | 0.736412000  | 1 | -3.281977000 | 1.235153000  | -0.300725000 |
| 6 | 0.880760000  | -1.657661000 | 0.552649000  | 1 | -1.432884000 | -0.418064000 | 1.453531000  |
| 1 | 0.970047000  | -1.188779000 | 1.536271000  |   |              |              |              |

**DMBCN**

E(electronic) = -579.076111520  
 Zero-point correction= 0.253182 (Hartree/Particle)  
 Thermal correction to Energy= 0.266557  
 Thermal correction to Enthalpy= 0.267501  
 Thermal correction to Gibbs Free Energy= 0.214039  
 Sum of electronic and zero-point Energies= -578.822929  
 Sum of electronic and thermal Energies= -578.809555  
 Sum of electronic and thermal Enthalpies= -578.808610  
 Sum of electronic and thermal Free Energies= -578.862073

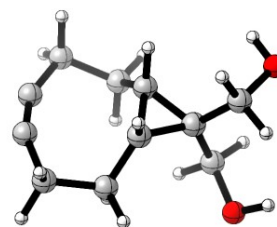

|   |              |              |              |   |              |              |              |
|---|--------------|--------------|--------------|---|--------------|--------------|--------------|
| 1 | -2.217945000 | -2.705200000 | -0.240467000 | 6 | 1.161660000  | -0.016940000 | -0.156231000 |
| 6 | -2.245897000 | -1.930982000 | 0.530920000  | 6 | -2.899741000 | -0.717327000 | 0.030575000  |
| 1 | -2.755639000 | -2.349078000 | 1.400742000  | 1 | -2.368814000 | 1.926785000  | -1.724844000 |
| 6 | -2.351997000 | 1.742195000  | -0.647418000 | 6 | -2.929827000 | 0.431730000  | -0.333791000 |
| 1 | -2.890369000 | 2.559401000  | -0.164131000 | 6 | 2.297057000  | -0.306338000 | -1.103370000 |
| 6 | -0.107481000 | 0.539905000  | -0.762718000 | 1 | 2.958597000  | 0.562120000  | -1.185999000 |
| 1 | -0.071333000 | 0.624296000  | -1.846614000 | 1 | 1.895597000  | -0.532903000 | -2.096004000 |
| 6 | -0.061362000 | -0.899407000 | -0.277596000 | 8 | 3.035502000  | -1.428557000 | -0.608273000 |
| 1 | 0.019329000  | -1.615041000 | -1.093393000 | 1 | 3.816363000  | -1.539926000 | -1.160897000 |
| 6 | -0.811516000 | -1.481950000 | 0.908470000  | 6 | 1.599461000  | 0.466624000  | 1.202071000  |
| 1 | -0.258736000 | -2.346390000 | 1.289895000  | 1 | 2.331622000  | -0.229881000 | 1.623197000  |
| 1 | -0.892710000 | -0.759256000 | 1.722454000  | 1 | 0.759137000  | 0.533053000  | 1.894372000  |
| 6 | -0.892837000 | 1.675159000  | -0.129263000 | 8 | 2.198609000  | 1.759040000  | 1.047558000  |
| 1 | -0.396475000 | 2.623506000  | -0.356882000 | 1 | 2.575432000  | 2.014804000  | 1.896313000  |
| 1 | -0.922060000 | 1.573847000  | 0.958087000  |   |              |              |              |

**Me-Cp**

E(electronic) = -709.455527595  
 Zero-point correction= 0.255608 (Hartree/Particle)  
 Thermal correction to Energy= 0.271618  
 Thermal correction to Enthalpy= 0.272562  
 Thermal correction to Gibbs Free Energy= 0.209385  
 Sum of electronic and zero-point Energies= -709.199919  
 Sum of electronic and thermal Energies= -709.183910  
 Sum of electronic and thermal Enthalpies= -709.182966  
 Sum of electronic and thermal Free Energies= -709.246142

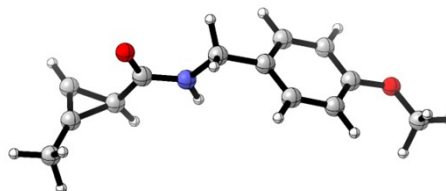

|   |             |              |              |   |              |              |              |
|---|-------------|--------------|--------------|---|--------------|--------------|--------------|
| 6 | 3.443615000 | 1.042506000  | 1.568636000  | 6 | -2.887840000 | -0.593508000 | 0.789615000  |
| 6 | 3.866294000 | 0.019793000  | 0.545662000  | 6 | -3.288998000 | 0.304572000  | -0.197058000 |
| 6 | 3.592004000 | 1.496245000  | 0.372910000  | 1 | -0.560030000 | 0.180257000  | -2.206232000 |
| 1 | 4.888397000 | -0.354276000 | 0.521781000  | 1 | -1.328036000 | -1.905771000 | 1.453481000  |
| 1 | 1.594575000 | -0.673054000 | 0.042251000  | 1 | -2.777195000 | 1.280363000  | -2.036121000 |
| 1 | 1.308676000 | 0.219840000  | 0.422327000  | 1 | -3.526565000 | -0.825950000 | 1.631098000  |
| 6 | 2.898183000 | -0.991044000 | 0.018534000  | 8 | -4.489752000 | 0.955144000  | -0.195779000 |
| 1 | 3.215308000 | 1.163147000  | 2.614331000  | 6 | -5.379550000 | 0.689749000  | 0.883726000  |
| 8 | 3.293379000 | -2.079045000 | -0.429998000 | 1 | -5.655635000 | -0.367156000 | 0.909130000  |
| 6 | 0.570614000 | -1.583041000 | -0.468633000 | 1 | -4.931508000 | 0.978935000  | 1.837494000  |
| 1 | 0.589032000 | -2.509238000 | 0.110500000  | 1 | -6.264203000 | 1.294326000  | 0.697187000  |
| 1 | 0.808852000 | -1.833990000 | -1.505206000 | 6 | 3.580032000  | 2.543357000  | -0.663691000 |

|   |              |              |              |   |             |             |              |
|---|--------------|--------------|--------------|---|-------------|-------------|--------------|
| 6 | -0.787389000 | -0.941049000 | -0.382583000 | 1 | 4.576284000 | 2.640655000 | -1.101412000 |
| 6 | -1.208478000 | -0.035659000 | -1.362985000 | 1 | 2.893846000 | 2.261474000 | -1.465955000 |
| 6 | -1.638079000 | -1.205456000 | 0.684757000  | 1 | 3.273682000 | 3.503046000 | -0.247847000 |
| 6 | -2.444067000 | 0.583023000  | -1.276238000 |   |             |             |              |

**DBC0**

E(electronic) = -785.454988490  
 Zero-point correction= 0.255483 (Hartree/Particle)  
 Thermal correction to Energy= 0.270280  
 Thermal correction to Enthalpy= 0.271224  
 Thermal correction to Gibbs Free Energy= 0.213890  
 Sum of electronic and zero-point Energies= -785.199505  
 Sum of electronic and thermal Energies= -785.184709  
 Sum of electronic and thermal Enthalpies= -785.183765  
 Sum of electronic and thermal Free Energies= -785.241099

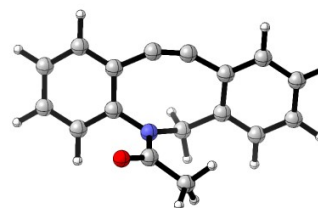

|   |              |              |              |   |              |              |              |
|---|--------------|--------------|--------------|---|--------------|--------------|--------------|
| 6 | -1.971458000 | -1.145629000 | 0.207815000  | 6 | -4.290447000 | 0.236181000  | -0.435113000 |
| 6 | 1.792373000  | -1.242781000 | 0.156095000  | 1 | 3.029214000  | -2.955540000 | 0.517995000  |
| 6 | -0.564432000 | 0.434235000  | -1.228045000 | 1 | 5.128262000  | -1.787980000 | -0.109279000 |
| 1 | -0.747372000 | 1.282479000  | -1.889697000 | 1 | 5.052649000  | 0.573954000  | -0.857975000 |
| 6 | -1.886987000 | 0.001713000  | -0.615971000 | 1 | 2.889881000  | 1.778045000  | -0.963071000 |
| 6 | 1.751150000  | 0.111099000  | -0.254035000 | 1 | -3.236625000 | -2.470439000 | 1.327203000  |
| 6 | -0.699393000 | -1.730716000 | 0.484262000  | 1 | -5.316051000 | -1.239456000 | 0.748168000  |
| 6 | 0.507112000  | -1.788699000 | 0.443861000  | 1 | -5.194416000 | 0.778362000  | -0.686177000 |
| 7 | 0.504523000  | 0.816595000  | -0.272125000 | 1 | -3.013455000 | 1.565793000  | -1.545596000 |
| 6 | 2.927559000  | 0.747117000  | -0.630458000 | 6 | 0.288344000  | 1.914257000  | 0.504594000  |
| 6 | 3.011291000  | -1.919351000 | 0.203737000  | 8 | -0.735271000 | 2.586287000  | 0.359309000  |
| 6 | 4.140343000  | 0.065639000  | -0.570181000 | 6 | 1.309020000  | 2.271629000  | 1.552835000  |
| 6 | 4.182589000  | -1.261525000 | -0.151173000 | 1 | 2.099307000  | 2.878336000  | 1.105186000  |
| 6 | -3.200366000 | -1.590064000 | 0.697125000  | 1 | 0.807101000  | 2.864188000  | 2.315522000  |
| 6 | -4.359826000 | -0.897231000 | 0.371165000  | 1 | 1.765235000  | 1.390036000  | 2.002593000  |
| 6 | -3.062182000 | 0.680288000  | -0.920590000 | 1 | -0.161353000 | -0.381206000 | -1.830004000 |

**Si7HT**

E(electronic) = -1136.51189229  
 Zero-point correction= 0.312161 (Hartree/Particle)  
 Thermal correction to Energy= 0.332556  
 Thermal correction to Enthalpy= 0.333500  
 Thermal correction to Gibbs Free Energy= 0.264269  
 Sum of electronic and zero-point Energies= -1136.199731  
 Sum of electronic and thermal Energies= -1136.179336  
 Sum of electronic and thermal Enthalpies= -1136.178392  
 Sum of electronic and thermal Free Energies= -1136.247624

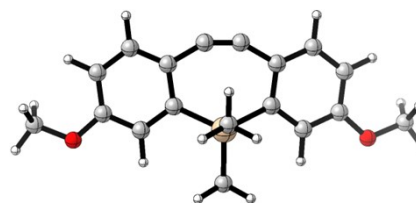

|    |              |              |              |   |              |              |              |
|----|--------------|--------------|--------------|---|--------------|--------------|--------------|
| 6  | 1.838494000  | 1.387498000  | 0.146957000  | 6 | -0.000059000 | -0.671666000 | 2.563014000  |
| 6  | -1.838401000 | 1.387323000  | 0.146816000  | 1 | -0.001389000 | 0.376241000  | 2.876132000  |
| 14 | 0.000026000  | -0.823109000 | 0.692606000  | 1 | -0.886762000 | -1.155291000 | 2.983998000  |
| 6  | 1.645759000  | -0.023528000 | 0.115996000  | 1 | 0.887889000  | -1.153021000 | 2.983977000  |
| 6  | -1.645816000 | -0.023734000 | 0.116018000  | 6 | 0.000044000  | -2.624258000 | 0.188663000  |
| 6  | 0.605876000  | 2.095440000  | 0.328349000  | 1 | -0.000014000 | -2.748488000 | -0.897860000 |
| 6  | -0.605656000 | 2.094831000  | 0.328183000  | 1 | 0.880238000  | -3.132690000 | 0.591945000  |
| 6  | 3.090344000  | 1.943626000  | -0.083560000 | 1 | -0.880180000 | -3.132587000 | 0.592019000  |
| 1  | 3.216220000  | 3.019884000  | -0.060647000 | 8 | 4.999508000  | -1.135782000 | -0.694019000 |
| 6  | -3.090137000 | 1.943631000  | -0.083884000 | 6 | 6.303145000  | -0.617727000 | -0.928405000 |
| 1  | -3.215850000 | 3.019910000  | -0.061179000 | 1 | 6.311656000  | 0.043096000  | -1.799435000 |
| 6  | -4.184415000 | 1.126629000  | -0.363072000 | 1 | 6.673696000  | -0.079082000 | -0.052030000 |
| 1  | -5.151951000 | 1.576906000  | -0.540223000 | 1 | 6.937363000  | -1.480532000 | -1.120480000 |
| 6  | -4.009093000 | -0.255460000 | -0.421151000 | 8 | -4.999677000 | -1.135665000 | -0.693852000 |
| 6  | -2.744357000 | -0.818158000 | -0.181181000 | 6 | -6.303298000 | -0.617553000 | -0.928243000 |
| 1  | -2.662776000 | -1.899707000 | -0.226784000 | 1 | -6.673738000 | -0.078703000 | -0.051949000 |
| 6  | 4.184539000  | 1.126544000  | -0.362851000 | 1 | -6.311825000 | 0.043091000  | -1.799407000 |
| 1  | 5.152156000  | 1.576708000  | -0.539866000 | 1 | -6.937597000 | -1.480348000 | -1.120090000 |
| 6  | 4.009029000  | -0.255501000 | -0.421176000 | 1 | 2.662529000  | -1.899589000 | -0.226941000 |
| 6  | 2.744224000  | -0.818054000 | -0.181255000 |   |              |              |              |

**TS-endo-BCN**

E(electronic) = -1586.54208636  
 Zero-point correction= 0.385289 (Hartree/Particle)  
 Thermal correction to Energy= 0.411183  
 Thermal correction to Enthalpy= 0.412127  
 Thermal correction to Gibbs Free Energy= 0.328539  
 Sum of electronic and zero-point Energies= -1586.156797  
 Sum of electronic and thermal Energies= -1586.130904  
 Sum of electronic and thermal Enthalpies= -1586.129959  
 Sum of electronic and thermal Free Energies= -1586.213547

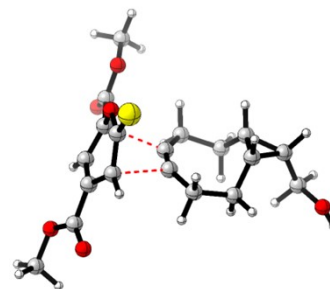

Frequency -339.0705

|   |              |              |              |    |              |              |              |
|---|--------------|--------------|--------------|----|--------------|--------------|--------------|
| 1 | 1.466248000  | 1.918726000  | -0.824648000 | 6  | -1.430545000 | 0.191019000  | 1.970684000  |
| 6 | 1.201099000  | 0.986263000  | -1.335275000 | 16 | -1.110952000 | 0.271815000  | 3.589491000  |
| 1 | 0.641894000  | 1.255117000  | -2.235423000 | 6  | -2.941811000 | -2.242765000 | -0.496937000 |
| 6 | 0.716698000  | -2.220099000 | 0.634088000  | 8  | -2.701709000 | -3.333631000 | -0.029184000 |
| 1 | 0.010538000  | -3.013063000 | 0.376019000  | 8  | -3.721961000 | -2.043547000 | -1.551087000 |
| 6 | 3.117574000  | -1.433109000 | 0.299259000  | 6  | -4.289967000 | -3.222472000 | -2.149143000 |
| 1 | 3.303258000  | -1.318707000 | 1.364518000  | 1  | -3.494765000 | -3.877864000 | -2.502610000 |
| 6 | 3.310792000  | -0.161047000 | -0.499386000 | 1  | -4.912776000 | -3.742479000 | -1.422121000 |
| 1 | 3.617204000  | 0.693346000  | 0.099962000  | 1  | -4.889773000 | -2.865046000 | -2.980931000 |
| 6 | 2.480648000  | 0.213040000  | -1.707625000 | 1  | -1.469524000 | -1.954327000 | 1.732995000  |
| 1 | 3.077421000  | 0.845433000  | -2.372156000 | 6  | -1.549099000 | 2.569580000  | -0.788454000 |
| 1 | 2.206103000  | -0.680116000 | -2.274358000 | 8  | -1.776363000 | 2.696733000  | -1.968803000 |
| 6 | 2.081441000  | -2.486861000 | -0.025587000 | 8  | -1.112387000 | 3.526245000  | 0.008530000  |
| 1 | 2.439774000  | -3.461072000 | 0.321162000  | 6  | -0.871257000 | 4.801887000  | -0.616628000 |
| 1 | 1.944553000  | -2.563895000 | -1.107221000 | 1  | -0.117361000 | 4.690919000  | -1.395652000 |
| 6 | 4.331074000  | -1.265350000 | -0.575233000 | 1  | -1.798739000 | 5.187130000  | -1.038045000 |
| 6 | 0.376455000  | 0.141373000  | -0.450758000 | 1  | -0.511831000 | 5.448535000  | 0.178002000  |
| 1 | 0.812516000  | -2.214429000 | 1.724863000  | 1  | -2.790510000 | 0.309166000  | -1.668201000 |
| 6 | 0.208363000  | -0.909272000 | 0.176687000  | 1  | 5.371448000  | 0.483906000  | 0.590298000  |
| 6 | -1.478332000 | 1.446268000  | 0.085460000  | 6  | 5.171053000  | -0.875707000 | -1.087684000 |
| 6 | -1.842029000 | -0.929883000 | 1.142442000  | 1  | 5.849348000  | -0.287786000 | -1.714591000 |
| 6 | -2.428663000 | 0.654957000  | -0.528478000 | 1  | 4.389262000  | -1.286675000 | -1.729957000 |
| 6 | -2.644557000 | -0.584786000 | 0.056138000  | 8  | 5.897528000  | -1.945812000 | -0.468380000 |
| 8 | -1.238922000 | 1.327276000  | 1.429388000  | 1  | 6.343657000  | -2.445402000 | -1.160865000 |

**TS-exo-BCN**

E(electronic) = -1586.54165981  
 Zero-point correction= 0.385310 (Hartree/Particle)  
 Thermal correction to Energy= 0.411204  
 Thermal correction to Enthalpy= 0.412149  
 Thermal correction to Gibbs Free Energy= 0.328567  
 Sum of electronic and zero-point Energies= -1586.156349  
 Sum of electronic and thermal Energies= -1586.130455  
 Sum of electronic and thermal Enthalpies= -1586.129511  
 Sum of electronic and thermal Free Energies= -1586.213093

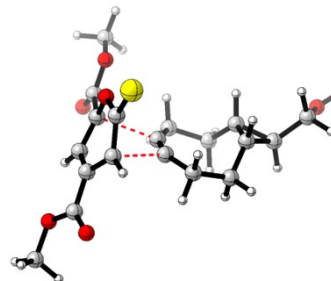

Frequency -339.0674

|   |              |              |              |    |              |              |              |
|---|--------------|--------------|--------------|----|--------------|--------------|--------------|
| 1 | 1.466206000  | 1.919781000  | -0.821772000 | 16 | -0.924368000 | -0.060659000 | 3.591827000  |
| 6 | 1.201567000  | 0.987997000  | -1.333925000 | 6  | -3.495075000 | -1.632185000 | -0.568323000 |
| 1 | 0.642876000  | 1.258018000  | -2.234043000 | 8  | -3.494558000 | -2.792192000 | -0.220535000 |
| 6 | 0.717218000  | -2.220128000 | 0.632608000  | 8  | -4.250927000 | -1.151762000 | -1.546838000 |
| 1 | 0.011221000  | -3.013092000 | 0.374043000  | 6  | -5.101276000 | -2.101419000 | -2.214089000 |
| 6 | 3.117941000  | -1.432552000 | 0.298894000  | 1  | -4.495309000 | -2.881001000 | -2.674405000 |
| 1 | 3.303179000  | -1.319057000 | 1.364324000  | 1  | -5.799541000 | -2.537646000 | -1.500663000 |
| 6 | 3.311274000  | -0.159702000 | -0.498434000 | 1  | -5.632808000 | -1.532543000 | -2.971189000 |
| 1 | 3.617392000  | 0.694107000  | 0.101867000  | 1  | -1.875603000 | -1.929252000 | 1.557100000  |
| 6 | 2.481561000  | 0.215619000  | -1.706567000 | 6  | -1.068020000 | 2.759626000  | -0.487866000 |
| 1 | 3.078569000  | 0.848918000  | -2.370012000 | 8  | -1.329823000 | 3.072183000  | -1.625715000 |
| 1 | 2.207513000  | -0.676856000 | -2.274613000 | 8  | -0.374166000 | 3.494220000  | 0.360942000  |
| 6 | 2.082056000  | -2.486180000 | -0.027108000 | 6  | 0.119749000  | 4.746630000  | -0.152653000 |
| 1 | 2.440523000  | -3.460657000 | 0.318766000  | 1  | 0.779541000  | 4.559709000  | -0.999590000 |
| 1 | 1.945326000  | -2.562284000 | -1.108841000 | 1  | -0.716018000 | 5.376630000  | -0.454104000 |
| 6 | 4.331667000  | -1.263772000 | -0.575074000 | 1  | 0.666076000  | 5.199557000  | 0.668975000  |
| 6 | 0.376668000  | 0.141842000  | -0.450913000 | 1  | -2.837572000 | 0.941681000  | -1.487207000 |
| 1 | 0.812981000  | -2.215031000 | 1.723394000  | 6  | 5.677806000  | -1.073049000 | 0.053941000  |
| 6 | 0.208653000  | -0.909114000 | 0.175981000  | 1  | 6.162126000  | -2.038848000 | 0.231739000  |
| 6 | -1.479310000 | 1.446004000  | 0.085300000  | 1  | 5.563699000  | -0.561276000 | 1.015728000  |
| 6 | -1.840689000 | -0.930358000 | 1.142402000  | 1  | 4.325376000  | -1.843422000 | -1.494881000 |
| 6 | -2.429108000 | 0.653890000  | -0.528359000 | 8  | 6.487955000  | -0.284303000 | -0.825434000 |
| 6 | -2.643829000 | -0.586044000 | 0.056345000  | 1  | 7.366676000  | -0.209532000 | -0.437916000 |
| 8 | -1.239260000 | 1.327339000  | 1.429109000  | 6  | -1.341573000 | 0.114354000  | 2.003143000  |

### TS-DMBCN

E(electronic) = -1701.07136215  
Zero-point correction= 0.419008 (Hartree/Particle)  
Thermal correction to Energy= 0.447443  
Thermal correction to Enthalpy= 0.448387  
Thermal correction to Gibbs Free Energy= 0.359138  
Sum of electronic and zero-point Energies= -1700.652355  
Sum of electronic and thermal Energies= -1700.623919  
Sum of electronic and thermal Enthalpies= -1700.622975  
Sum of electronic and thermal Free Energies= -1700.712224

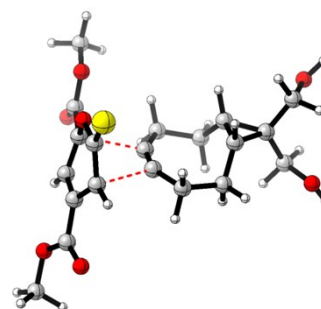

Frequency -339.1906

|    |              |              |              |   |              |              |              |
|----|--------------|--------------|--------------|---|--------------|--------------|--------------|
| 1  | 0.834132000  | 2.138122000  | -0.982706000 | 6 | -3.577316000 | -2.039828000 | -0.442125000 |
| 6  | 0.725369000  | 1.117508000  | -1.365788000 | 8 | -3.430262000 | -3.139434000 | 0.043407000  |
| 1  | 0.175962000  | 1.179575000  | -2.308878000 | 8 | -4.338896000 | -1.792330000 | -1.499513000 |
| 6  | 0.609103000  | -1.838558000 | 1.012979000  | 6 | -5.004592000 | -2.928694000 | -2.079022000 |
| 1  | 0.043382000  | -2.757015000 | 0.838876000  | 1 | -4.267496000 | -3.653215000 | -2.423338000 |
| 6  | 2.867816000  | -0.732856000 | 0.665155000  | 1 | -5.667090000 | -3.383962000 | -1.343756000 |
| 1  | 2.920081000  | -0.436641000 | 1.710209000  | 1 | -5.574195000 | -2.535109000 | -2.915690000 |
| 6  | 2.916675000  | 0.424693000  | -0.310890000 | 1 | -2.060151000 | -1.847743000 | 1.768954000  |
| 1  | 3.016217000  | 1.398443000  | 0.163789000  | 6 | -1.794289000 | 2.638199000  | -0.804398000 |
| 6  | 2.113873000  | 0.489122000  | -1.594396000 | 8 | -2.033841000 | 2.776352000  | -1.980974000 |
| 1  | 2.648422000  | 1.098294000  | -2.329601000 | 8 | -1.254718000 | 3.556898000  | -0.025714000 |
| 1  | 1.973158000  | -0.500376000 | -2.032598000 | 6 | -0.909084000 | 4.799298000  | -0.668512000 |
| 6  | 2.036276000  | -1.980944000 | 0.452545000  | 1 | -0.184036000 | 4.612449000  | -1.460275000 |
| 1  | 2.514070000  | -2.825766000 | 0.957450000  | 1 | -1.805067000 | 5.265106000  | -1.076566000 |
| 1  | 1.968635000  | -2.237318000 | -0.606721000 | 1 | -0.475881000 | 5.416719000  | 0.112427000  |
| 6  | 4.129265000  | -0.458805000 | -0.120967000 | 1 | -3.232395000 | 0.478912000  | -1.644601000 |
| 6  | -0.012327000 | 0.284784000  | -0.395792000 | 6 | 5.275414000  | 0.148424000  | 0.647291000  |
| 1  | 0.636092000  | -1.674525000 | 2.095195000  | 1 | 5.925912000  | -0.632950000 | 1.058324000  |
| 6  | -0.056576000 | -0.691972000 | 0.359101000  | 1 | 4.885038000  | 0.738387000  | 1.482475000  |
| 6  | -2.052290000 | 1.354301000  | -0.091015000 | 6 | 4.548801000  | -1.412415000 | -1.216847000 |
| 6  | -2.14223000  | -0.909435000 | 1.236240000  | 1 | 3.702373000  | -1.714882000 | -1.829721000 |
| 6  | -2.845589000 | 0.366746000  | -0.641147000 | 1 | 5.276831000  | -0.925226000 | -1.872929000 |
| 6  | -2.919316000 | -0.814580000 | 0.082993000  | 8 | 6.028107000  | 0.985522000  | -0.235548000 |
| 8  | -1.878262000 | 1.429519000  | 1.265724000  | 1 | 6.807497000  | 1.297925000  | 0.236265000  |
| 6  | -1.843092000 | 0.289047000  | 1.980502000  | 8 | 5.104156000  | -2.625840000 | -0.699162000 |
| 16 | -1.498865000 | 0.360979000  | 3.594760000  | 1 | 5.954694000  | -2.424580000 | -0.293925000 |

### TS-Me-Cp

E(electronic) = -1831.44501715  
Zero-point correction= 0.422106 (Hartree/Particle)  
Thermal correction to Energy= 0.452672  
Thermal correction to Enthalpy= 0.453616  
Thermal correction to Gibbs Free Energy= 0.356590  
Sum of electronic and zero-point Energies= -1831.022911  
Sum of electronic and thermal Energies= -1830.992345  
Sum of electronic and thermal Enthalpies= -1830.991401  
Sum of electronic and thermal Free Energies= -1831.088427

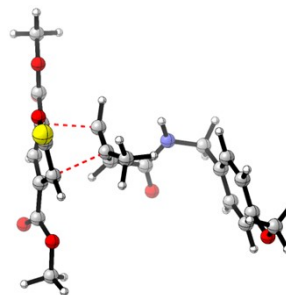

Frequency -386.0312

|    |              |              |              |   |              |              |              |
|----|--------------|--------------|--------------|---|--------------|--------------|--------------|
| 6  | 0.996277000  | -1.082111000 | -0.449343000 | 6 | 2.605963000  | 2.907695000  | -0.396150000 |
| 6  | 0.500594000  | 0.041584000  | -1.290105000 | 8 | 3.396489000  | 3.237873000  | -1.250070000 |
| 6  | 0.246245000  | -0.161953000 | 0.176346000  | 8 | 1.657577000  | 3.694105000  | 0.088503000  |
| 1  | 1.195919000  | 0.821745000  | -1.609256000 | 6 | 1.590973000  | 5.021115000  | -0.465836000 |
| 7  | -1.360035000 | -1.243156000 | -2.169149000 | 1 | 2.526688000  | 5.546291000  | -0.277676000 |
| 1  | -1.120750000 | -1.884960000 | -1.421848000 | 1 | 1.397082000  | 4.963933000  | -1.536313000 |
| 6  | -0.669464000 | -0.085181000 | -2.220119000 | 1 | 0.767366000  | 5.508061000  | 0.047536000  |
| 6  | 3.132618000  | -0.732810000 | 0.163761000  | 6 | -3.695008000 | -0.859253000 | -1.576541000 |
| 6  | 1.763144000  | 1.223217000  | 1.288660000  | 6 | -4.019046000 | 0.496454000  | -1.449715000 |
| 6  | 3.313077000  | 0.523678000  | -0.379803000 | 6 | -4.178961000 | -1.749056000 | -0.623019000 |
| 6  | 2.599214000  | 1.550549000  | 0.225076000  | 6 | -4.796950000 | 0.944438000  | -0.394421000 |
| 8  | 2.827022000  | -0.875414000 | 1.492872000  | 6 | -4.964375000 | -1.317038000 | 0.446024000  |
| 6  | 2.097150000  | 0.080000000  | 2.104040000  | 6 | -5.268107000 | 0.038459000  | 0.560491000  |
| 1  | 1.121636000  | -2.153515000 | -0.520218000 | 1 | -3.655378000 | 1.206291000  | -2.184997000 |
| 8  | -0.972439000 | 0.848412000  | -2.966642000 | 1 | -3.936886000 | -2.804161000 | -0.705308000 |
| 16 | 1.682186000  | -0.123628000 | 3.687940000  | 1 | -5.053143000 | 1.992739000  | -0.292570000 |
| 1  | 1.104208000  | 1.958949000  | 1.728888000  | 1 | -5.326073000 | -2.036661000 | 1.168238000  |
| 6  | -2.743070000 | -1.330217000 | -2.648427000 | 8 | -6.025369000 | 0.570052000  | 1.565664000  |
| 1  | -2.940790000 | -2.368603000 | -2.911924000 | 6 | -6.521900000 | -0.323682000 | 2.556537000  |
| 1  | -2.827037000 | -0.723784000 | -3.548400000 | 1 | -7.182096000 | -1.071550000 | 2.110468000  |

|   |             |              |              |   |              |              |              |
|---|-------------|--------------|--------------|---|--------------|--------------|--------------|
| 6 | 3.766658000 | -1.938587000 | -0.450362000 | 1 | -5.700746000 | -0.818945000 | 3.080435000  |
| 8 | 4.193889000 | -1.927070000 | -1.580164000 | 1 | -7.084980000 | 0.289255000  | 3.256726000  |
| 8 | 3.769695000 | -2.980898000 | 0.356851000  | 6 | -0.922877000 | 0.011051000  | 1.081738000  |
| 6 | 4.334843000 | -4.192584000 | -0.182502000 | 1 | -1.108210000 | 1.062771000  | 1.300382000  |
| 1 | 3.771169000 | -4.499706000 | -1.062516000 | 1 | -1.805970000 | -0.391807000 | 0.571684000  |
| 1 | 5.380368000 | -4.027215000 | -0.438898000 | 1 | -0.782569000 | -0.538006000 | 2.012857000  |
| 1 | 4.244736000 | -4.929230000 | 0.609904000  | 1 | 3.843828000  | 0.647145000  | -1.314291000 |

### TS-Si7HT

E(electronic) = -2258.51522839  
 Zero-point correction= 0.477852 (Hartree/Particle)  
 Thermal correction to Energy= 0.513490  
 Thermal correction to Enthalpy= 0.514434  
 Thermal correction to Gibbs Free Energy= 0.410279  
 Sum of electronic and zero-point Energies= -2258.037376  
 Sum of electronic and thermal Energies= -2258.001738  
 Sum of electronic and thermal Enthalpies= -2258.000794  
 Sum of electronic and thermal Free Energies= -2258.104949

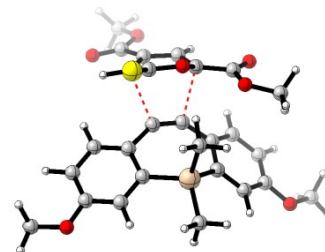

Frequency -327.0985

|    |              |              |              |   |              |              |              |
|----|--------------|--------------|--------------|---|--------------|--------------|--------------|
| 6  | 1.639036000  | -0.290682000 | -0.626998000 | 1 | 2.637200000  | 1.358128000  | -1.576925000 |
| 6  | -1.861947000 | -0.784513000 | -0.372406000 | 6 | -3.151735000 | -0.547747000 | -0.841903000 |
| 14 | 0.272200000  | -2.471575000 | 0.701776000  | 1 | -3.456441000 | 0.459065000  | -1.104013000 |
| 6  | 1.686910000  | -1.667157000 | -0.286288000 | 6 | -4.054340000 | -1.593362000 | -1.006999000 |
| 6  | -1.444796000 | -2.104583000 | -0.047651000 | 1 | -5.048502000 | -1.382966000 | -1.378098000 |
| 6  | 0.398078000  | 0.374999000  | -0.309352000 | 6 | -3.655775000 | -2.894834000 | -0.698118000 |
| 6  | -0.833422000 | 0.222955000  | -0.265306000 | 6 | -2.357652000 | -3.137214000 | -0.225927000 |
| 6  | 0.799119000  | 2.227921000  | 1.016593000  | 1 | -2.094275000 | -4.165400000 | 0.002136000  |
| 6  | -1.797266000 | 2.190729000  | 0.565139000  | 6 | 3.829344000  | -0.424248000 | -1.644809000 |
| 6  | 0.330356000  | 3.149617000  | 0.100267000  | 1 | 4.639095000  | 0.062956000  | -2.171343000 |
| 6  | -1.042823000 | 3.143977000  | -0.111437000 | 6 | 3.893968000  | -1.776835000 | -1.307634000 |
| 8  | 0.004043000  | 1.783640000  | 2.027092000  | 6 | 2.820863000  | -2.387068000 | -0.640764000 |
| 6  | -1.326881000 | 1.686912000  | 1.829663000  | 1 | 2.909264000  | -3.444202000 | -0.409477000 |
| 16 | -2.271611000 | 1.057316000  | 3.028129000  | 6 | 0.336668000  | -1.784806000 | 2.443199000  |
| 6  | -1.695045000 | 3.938620000  | -1.191931000 | 1 | 0.270878000  | -0.694396000 | 2.454151000  |
| 8  | -2.841683000 | 3.786343000  | -1.532174000 | 1 | -0.483286000 | -2.188182000 | 3.045162000  |
| 8  | -0.864459000 | 4.824842000  | -1.727459000 | 1 | 1.281996000  | -2.072981000 | 2.914616000  |
| 6  | -1.404376000 | 5.638512000  | -2.781702000 | 6 | 0.531800000  | -4.323300000 | 0.723984000  |
| 1  | -1.721514000 | 5.010389000  | -3.614107000 | 1 | 0.502338000  | -4.757616000 | -0.279184000 |
| 1  | -2.248123000 | 6.219967000  | -2.410195000 | 1 | 1.501260000  | -4.561183000 | 1.171576000  |
| 1  | -0.594307000 | 6.295064000  | -3.087336000 | 1 | -0.236316000 | -4.810370000 | 1.331526000  |
| 1  | -2.850595000 | 2.071104000  | 0.351250000  | 8 | 4.946832000  | -2.579145000 | -1.585872000 |
| 6  | 2.260835000  | 2.011974000  | 1.268296000  | 6 | 6.064041000  | -2.003333000 | -2.252166000 |
| 8  | 3.113033000  | 2.658853000  | 0.717284000  | 1 | 5.780295000  | -1.625959000 | -3.238278000 |
| 8  | 2.466936000  | 1.010995000  | 2.101684000  | 1 | 6.499730000  | -1.195354000 | -1.658202000 |
| 6  | 3.835673000  | 0.602854000  | 2.267834000  | 1 | 6.790525000  | -2.805279000 | -2.364913000 |
| 1  | 4.242990000  | 0.290356000  | 1.304735000  | 8 | -4.450312000 | -3.981371000 | -0.819330000 |
| 1  | 4.425932000  | 1.421720000  | 2.678748000  | 6 | -5.779312000 | -3.786465000 | -1.288764000 |
| 1  | 3.807263000  | -0.233361000 | 2.961020000  | 1 | -6.341279000 | -3.136243000 | -0.613038000 |
| 1  | 1.027879000  | 3.707485000  | -0.509800000 | 1 | -5.780038000 | -3.362755000 | -2.296600000 |
| 6  | 2.697757000  | 0.311260000  | -1.301429000 | 1 | -6.236590000 | -4.773352000 | -1.308482000 |

### TS-DMBCO

E(electronic) = -1907.44003686  
 Zero-point correction= 0.420677 (Hartree/Particle)  
 Thermal correction to Energy= 0.450720  
 Thermal correction to Enthalpy= 0.451664  
 Thermal correction to Gibbs Free Energy= 0.358939  
 Sum of electronic and zero-point Energies= -1907.019360  
 Sum of electronic and thermal Energies= -1906.989317  
 Sum of electronic and thermal Enthalpies= -1906.988372  
 Sum of electronic and thermal Free Energies= -1907.081097

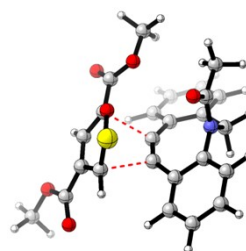

Frequency -413.6878

|   |              |              |              |   |              |              |              |
|---|--------------|--------------|--------------|---|--------------|--------------|--------------|
| 6 | -0.934667000 | -1.445799000 | -1.182872000 | 1 | -1.693816000 | 5.667777000  | -1.283936000 |
| 6 | -0.164205000 | 2.124327000  | -0.924051000 | 1 | -3.143975000 | 3.747054000  | -0.669685000 |
| 6 | -2.764502000 | 0.330708000  | -1.554811000 | 1 | 0.544915000  | -3.004955000 | -1.167655000 |
| 1 | -3.851430000 | 0.312367000  | -1.656705000 | 1 | -0.988645000 | -4.745800000 | -2.003511000 |
| 6 | -2.257365000 | -1.099093000 | -1.524263000 | 1 | -3.361681000 | -4.172498000 | -2.484597000 |
| 6 | -1.543933000 | 2.330803000  | -0.720767000 | 1 | -4.141585000 | -1.844259000 | -2.209499000 |
| 6 | -0.062671000 | -0.411434000 | -0.664841000 | 6 | -2.884836000 | 1.048721000  | 0.822359000  |
| 6 | 0.308513000  | 0.779372000  | -0.695911000 | 8 | -2.563953000 | 1.807228000  | 1.738305000  |
| 6 | 0.959376000  | -1.220362000 | 1.161597000  | 6 | -3.846419000 | -0.087815000 | 1.038706000  |

|    |              |              |              |   |              |              |              |
|----|--------------|--------------|--------------|---|--------------|--------------|--------------|
| 6  | 2.169965000  | 1.006361000  | 0.527692000  | 1 | -4.752657000 | 0.075719000  | 0.449261000  |
| 1  | 2.581247000  | 1.953267000  | 0.206273000  | 1 | -3.414917000 | -1.040672000 | 0.729772000  |
| 6  | 2.211966000  | -1.365723000 | 0.575269000  | 1 | -4.102172000 | -0.126096000 | 2.095078000  |
| 1  | 2.549715000  | -2.342087000 | 0.253867000  | 1 | -2.373366000 | 0.806119000  | -2.456388000 |
| 6  | 2.854490000  | -0.183845000 | 0.258870000  | 6 | 0.094815000  | -2.394764000 | 1.512545000  |
| 8  | 0.691340000  | -0.137125000 | 1.955426000  | 8 | 0.469532000  | -3.535273000 | 1.395134000  |
| 6  | 1.294695000  | 1.039377000  | 1.675379000  | 8 | -1.101793000 | -2.017963000 | 1.917078000  |
| 16 | 1.032201000  | 2.342165000  | 2.644783000  | 6 | -2.046150000 | -3.081171000 | -2.154591000 |
| 7  | -2.399457000 | 1.217654000  | -0.438393000 | 1 | -1.637416000 | -3.786947000 | 2.876101000  |
| 6  | -2.083229000 | 3.605195000  | -0.841824000 | 1 | -2.934299000 | -2.598184000 | 2.550635000  |
| 6  | 0.640841000  | 3.206333000  | -1.292941000 | 1 | -2.263960000 | -3.582551000 | 1.209559000  |
| 6  | -1.267411000 | 4.676415000  | -1.189605000 | 6 | 4.096030000  | -0.131661000 | -0.556121000 |
| 6  | 0.089572000  | 4.472372000  | -1.430869000 | 8 | 4.523663000  | 0.884425000  | -1.057050000 |
| 6  | -0.488318000 | -2.757004000 | -1.379539000 | 8 | 4.676817000  | -1.318196000 | -0.670649000 |
| 6  | -1.350612000 | -3.735432000 | -1.856550000 | 6 | 5.888257000  | -1.357052000 | -1.446656000 |
| 6  | -3.114751000 | -2.101855000 | -1.971131000 | 1 | 5.682829000  | -1.042827000 | -2.469332000 |
| 6  | -2.674814000 | -3.412189000 | -2.132375000 | 1 | 6.637162000  | -0.707512000 | -0.994904000 |
| 1  | 1.696970000  | 3.049301000  | -1.476379000 | 1 | 6.214583000  | -2.392467000 | -1.422327000 |
| 1  | 0.720800000  | 5.303558000  | -1.720638000 |   |              |              |              |

### PROD-endo-BCN

E(electronic) = -1586.61197020  
 Zero-point correction= 0.390662 (Hartree/Particle)  
 Thermal correction to Energy= 0.415501  
 Thermal correction to Enthalpy= 0.416445  
 Thermal correction to Gibbs Free Energy= 0.334718  
 Sum of electronic and zero-point Energies= -1586.221308  
 Sum of electronic and thermal Energies= -1586.196469  
 Sum of electronic and thermal Enthalpies= -1586.195525  
 Sum of electronic and thermal Free Energies= -1586.277253

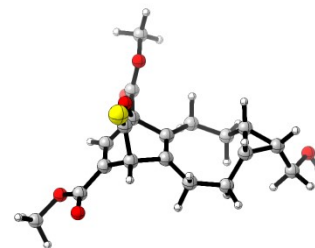

|   |              |              |              |    |              |              |               |
|---|--------------|--------------|--------------|----|--------------|--------------|---------------|
| 1 | 1.607106000  | 2.021057000  | -0.351985000 | 16 | -1.869625000 | -0.218494000 | 3.366334000   |
| 6 | 1.485045000  | 1.077927000  | -0.900669000 | 1  | 5.302925000  | -0.637326000 | 1.271389000   |
| 1 | 1.151254000  | 1.364298000  | -1.904400000 | 6  | -3.396726000 | -1.604635000 | -0.777495000  |
| 6 | 0.890243000  | -2.136070000 | 0.543967000  | 8  | -3.613941000 | -2.663779000 | -0.230628000  |
| 1 | 0.342313000  | -2.947845000 | 0.051144000  | 8  | -4.106798000 | -1.141661000 | -1.800748000  |
| 6 | 3.216087000  | -1.252213000 | 0.937803000  | 6  | -5.190852000 | -1.976198000 | -2.245054000  |
| 1 | 3.082188000  | -1.275052000 | 2.014969000  | 1  | -4.806176000 | -2.939271000 | -2.578976000  |
| 6 | 3.455078000  | 0.103609000  | 0.330245000  | 1  | -5.906921000 | -2.116221000 | -1.435939000  |
| 1 | 3.467728000  | 0.942132000  | 1.019840000  | 1  | -5.648538000 | -1.440741000 | -3.071687000  |
| 6 | 2.862341000  | 0.435732000  | -1.017702000 | 1  | -1.539690000 | -2.046419000 | 1.144419000   |
| 1 | 3.502733000  | 1.163353000  | -1.525648000 | 6  | -0.779436000 | 2.651181000  | -0.576427000  |
| 1 | 2.816195000  | -0.435026000 | -1.671249000 | 8  | -0.914560000 | 2.980228000  | -1.729357000  |
| 6 | 2.369277000  | -2.266205000 | 0.206796000  | 8  | -0.444263000 | 3.459488000  | 0.408037000   |
| 1 | 2.672648000  | -3.274325000 | 0.506578000  | 6  | -0.190367000 | 4.829468000  | 0.036828000   |
| 1 | 2.508212000  | -2.217904000 | -0.872495000 | 1  | 0.643878000  | 4.867911000  | -0.663212000  |
| 6 | 4.601142000  | -0.868479000 | 0.476816000  | 1  | -1.083768000 | 5.261436000  | -0.4111709000 |
| 6 | 0.335323000  | 0.341374000  | -0.255345000 | 1  | 0.059839000  | 5.337358000  | 0.963221000   |
| 1 | 0.758969000  | -2.318651000 | 1.619027000  | 1  | -2.616238000 | 1.017596000  | -1.675991000  |
| 6 | 0.108902000  | -0.877085000 | 0.253206000  | 6  | 5.253934000  | -1.500923000 | -0.717960000  |
| 6 | -0.957397000 | 1.206883000  | -0.135863000 | 1  | 5.826591000  | -2.380772000 | -0.406776000  |
| 6 | -1.355871000 | -1.060705000 | 0.732507000  | 1  | 4.522814000  | -1.821247000 | -1.462987000  |
| 6 | -2.081268000 | 0.524698000  | -0.875827000 | 8  | 6.139388000  | -0.534050000 | -1.299167000  |
| 6 | -2.310421000 | -0.685169000 | -0.375821000 | 1  | 6.605655000  | -0.956752000 | -2.028377000  |
| 8 | -1.325978000 | 1.224739000  | 1.283405000  | 6  | -1.519449000 | 0.011577000  | 1.786189000   |

### PROD-exo-BCN

E(electronic) = -1586.61595316  
 Zero-point correction= 0.390397 (Hartree/Particle)  
 Thermal correction to Energy= 0.415168  
 Thermal correction to Enthalpy= 0.416112  
 Thermal correction to Gibbs Free Energy= 0.334912  
 Sum of electronic and zero-point Energies= -1586.225556  
 Sum of electronic and thermal Energies= -1586.200785  
 Sum of electronic and thermal Enthalpies= -1586.199841  
 Sum of electronic and thermal Free Energies= -1586.281041

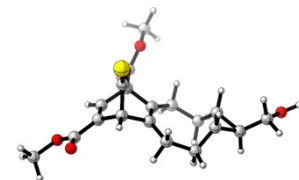

|   |             |              |              |    |              |              |              |
|---|-------------|--------------|--------------|----|--------------|--------------|--------------|
| 1 | 1.375338000 | 2.171598000  | -0.648814000 | 6  | -1.227125000 | -0.227976000 | 1.808848000  |
| 6 | 1.176119000 | 1.279510000  | -1.256755000 | 16 | -1.268030000 | -0.650168000 | 3.387800000  |
| 1 | 0.641783000 | 1.641992000  | -2.142503000 | 6  | -3.492442000 | -1.647722000 | -0.553730000 |
| 6 | 0.983488000 | -2.085899000 | -0.081338000 | 8  | -3.571447000 | -2.770870000 | -0.105910000 |
| 1 | 0.391730000 | -2.872149000 | -0.564928000 | 8  | -4.388183000 | -1.116111000 | -1.378682000 |
| 6 | 3.320674000 | -1.107339000 | -0.017504000 | 6  | -5.498943000 | -1.958777000 | -1.732342000 |
| 1 | 3.435979000 | -1.221941000 | 1.057853000  | 1  | -5.139692000 | -2.853633000 | -2.239468000 |

|   |              |              |              |   |              |              |              |
|---|--------------|--------------|--------------|---|--------------|--------------|--------------|
| 6 | 3.390460000  | 0.301438000  | -0.541892000 | 1 | -6.058091000 | -2.230988000 | -0.837753000 |
| 1 | 3.549309000  | 1.077276000  | 0.202459000  | 1 | -6.113653000 | -1.362299000 | -2.400119000 |
| 6 | 2.520924000  | 0.719098000  | -1.701208000 | 1 | -1.301040000 | -2.199829000 | 0.938547000  |
| 1 | 3.023483000  | 1.515967000  | -2.257797000 | 6 | -1.018266000 | 2.695829000  | -0.312619000 |
| 1 | 2.382052000  | -0.101485000 | -2.406077000 | 8 | -1.390094000 | 3.152018000  | -1.365804000 |
| 6 | 2.389720000  | -2.100616000 | -0.664857000 | 8 | -0.504527000 | 3.396397000  | 0.677650000  |
| 1 | 2.780793000  | -3.111172000 | -0.509941000 | 6 | -0.354065000 | 4.809829000  | 0.435301000  |
| 1 | 2.358190000  | -1.953856000 | -1.745038000 | 1 | 0.314853000  | 4.964783000  | -0.410811000 |
| 6 | 4.546974000  | -0.635816000 | -0.756367000 | 1 | -1.327800000 | 5.255505000  | 0.237271000  |
| 6 | 0.199974000  | 0.425284000  | -0.484876000 | 1 | 0.076393000  | 5.214096000  | 1.346287000  |
| 1 | 1.043476000  | -2.388009000 | 0.972911000  | 1 | -2.981444000 | 1.098092000  | -1.253609000 |
| 6 | 0.115201000  | -0.850835000 | -0.087344000 | 6 | 5.817478000  | -0.425683000 | 0.016025000  |
| 6 | -1.072194000 | 1.203295000  | -0.026925000 | 1 | 5.593460000  | 0.086040000  | 0.958729000  |
| 6 | -1.229035000 | -1.165397000 | 0.622512000  | 1 | 6.523254000  | 0.188776000  | -0.545926000 |
| 6 | -2.291524000 | 0.549273000  | -0.627239000 | 1 | 4.668421000  | -1.021589000 | -1.765363000 |
| 6 | -2.384079000 | -0.719592000 | -0.242337000 | 8 | 6.499362000  | -1.655360000 | 0.280277000  |
| 8 | -1.169562000 | 1.042220000  | 1.427452000  | 1 | 5.887257000  | -2.228256000 | 0.757285000  |

### PROD-DMBCN

E(electronic) = -1701.14627047

Zero-point correction= 0.424682 (Hartree/Particle)

Thermal correction to Energy= 0.451670

Thermal correction to Enthalpy= 0.452614

Thermal correction to Gibbs Free Energy= 0.366831

Sum of electronic and zero-point Energies= -1700.721588

Sum of electronic and thermal Energies= -1700.694600

Sum of electronic and thermal Enthalpies= -1700.693656

Sum of electronic and thermal Free Energies= -1700.779440

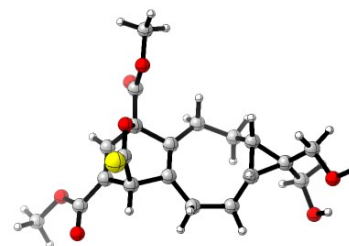

|    |              |              |              |   |              |              |              |
|----|--------------|--------------|--------------|---|--------------|--------------|--------------|
| 1  | 0.818602000  | 2.318641000  | -0.699283000 | 6 | -3.672226000 | -1.947347000 | -0.496588000 |
| 6  | 0.732878000  | 1.355512000  | -1.219244000 | 8 | -3.673392000 | -3.019459000 | 0.067974000  |
| 1  | 0.231100000  | 1.575674000  | -2.168394000 | 8 | -4.550620000 | -1.603592000 | -1.432352000 |
| 6  | 0.769624000  | -1.870314000 | 0.315823000  | 6 | -5.541544000 | -2.593069000 | -1.760967000 |
| 1  | 0.289470000  | -2.757436000 | -0.113564000 | 1 | -5.057069000 | -3.491881000 | -2.141138000 |
| 6  | 2.980953000  | -0.658643000 | 0.426200000  | 1 | -6.136551000 | -2.829714000 | -0.879528000 |
| 1  | 2.984303000  | -0.638263000 | 1.513040000  | 1 | -6.160477000 | -2.138990000 | -2.529271000 |
| 6  | 2.951604000  | 0.679747000  | -0.262036000 | 1 | -1.562631000 | -2.104398000 | 1.191653000  |
| 1  | 2.940278000  | 1.552029000  | 0.386667000  | 6 | -1.654567000 | 2.630719000  | -0.590276000 |
| 6  | 2.140952000  | 0.861292000  | -1.522948000 | 8 | -1.983339000 | 2.927827000  | -1.712482000 |
| 1  | 2.614626000  | 1.615653000  | -2.158336000 | 8 | -1.292799000 | 3.485133000  | 0.344657000  |
| 1  | 2.087146000  | -0.051423000 | -2.115043000 | 6 | -1.268375000 | 4.872239000  | -0.048343000 |
| 6  | 2.214804000  | -1.815521000 | -0.164987000 | 1 | -0.550537000 | 5.008802000  | -0.856658000 |
| 1  | 2.680945000  | -2.754304000 | 0.148822000  | 1 | -2.262835000 | 5.182461000  | -0.365909000 |
| 1  | 2.251865000  | -1.811052000 | -1.254238000 | 1 | -0.959584000 | 5.417423000  | 0.838304000  |
| 6  | 4.234892000  | -0.115101000 | -0.221008000 | 1 | -3.376924000 | 0.748714000  | -1.467450000 |
| 6  | -0.214443000 | 0.494638000  | -0.419681000 | 6 | 5.293741000  | 0.408743000  | 0.713364000  |
| 1  | 0.774677000  | -2.050731000 | 1.399270000  | 1 | 4.831153000  | 0.874946000  | 1.588772000  |
| 6  | -0.205839000 | -0.734520000 | 0.112738000  | 1 | 5.911405000  | 1.154908000  | 0.201809000  |
| 6  | -1.586017000 | 1.180877000  | -0.138499000 | 6 | 4.798619000  | -0.759415000 | -1.467547000 |
| 6  | -1.564770000 | -1.108108000 | 0.764486000  | 1 | 4.043557000  | -0.896716000 | -2.239637000 |
| 6  | -2.687802000 | 0.343786000  | -0.739030000 | 1 | 5.580932000  | -0.110066000 | -1.879304000 |
| 6  | -2.687247000 | -0.879646000 | -0.219692000 | 8 | 6.120405000  | -0.691576000 | 1.123161000  |
| 8  | -1.778804000 | 1.167522000  | 1.314798000  | 1 | 6.901614000  | -0.342542000 | 1.565894000  |
| 6  | -1.745931000 | -0.054068000 | 1.833474000  | 8 | 5.341839000  | -2.058276000 | -1.206344000 |
| 16 | -1.873966000 | -0.307490000 | 3.443346000  | 1 | 5.906252000  | -1.963333000 | -0.426736000 |

### PROD-Me-Cp

E(electronic) = -1831.53004728

Zero-point correction= 0.427463 (Hartree/Particle)

Thermal correction to Energy= 0.457015

Thermal correction to Enthalpy= 0.457959

Thermal correction to Gibbs Free Energy= 0.362456

Sum of electronic and zero-point Energies= -1831.102585

Sum of electronic and thermal Energies= -1831.073033

Sum of electronic and thermal Enthalpies= -1831.072089

Sum of electronic and thermal Free Energies= -1831.167591

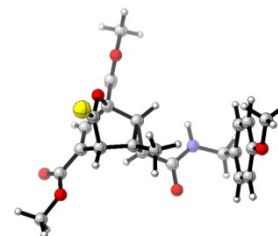

|   |              |              |              |   |              |              |              |
|---|--------------|--------------|--------------|---|--------------|--------------|--------------|
| 6 | -0.688329000 | 0.837465000  | -0.432158000 | 6 | -3.951282000 | -1.905572000 | -0.376134000 |
| 6 | -0.529998000 | -0.335024000 | -1.357268000 | 8 | -4.940140000 | -1.755137000 | -1.058776000 |
| 6 | -0.509743000 | -0.543041000 | 0.134964000  | 8 | -3.577109000 | -3.068959000 | 0.139529000  |
| 1 | -1.390862000 | -0.684181000 | -1.915014000 | 6 | -4.424166000 | -4.193806000 | -0.156627000 |
| 7 | 1.499441000  | 0.447673000  | -2.459251000 | 1 | -5.425728000 | -4.014988000 | 0.232903000  |
| 1 | 1.206024000  | 1.369330000  | -2.164601000 | 1 | -4.461000000 | -4.355233000 | -1.233384000 |
| 6 | 0.762648000  | -0.604867000 | -2.073318000 | 1 | -3.964649000 | -5.041864000 | 0.342292000  |
| 6 | -2.085053000 | 1.354235000  | -0.049308000 | 6 | 3.761502000  | -0.008836000 | -1.640601000 |



|    |              |              |              |   |              |              |              |
|----|--------------|--------------|--------------|---|--------------|--------------|--------------|
| 6  | -1.812158000 | -0.972929000 | 0.865084000  | 6 | 4.217413000  | -1.301433000 | -1.370920000 |
| 6  | -3.156587000 | 0.420058000  | -0.533656000 | 6 | 4.042118000  | 0.999121000  | -0.721661000 |
| 6  | -3.014439000 | -0.806015000 | -0.033532000 | 6 | 4.927969000  | -1.578161000 | -0.212143000 |
| 8  | -2.106614000 | 1.323172000  | 1.414756000  | 6 | 4.752683000  | 0.741293000  | 0.448650000  |
| 6  | -1.976854000 | 0.098527000  | 1.932530000  | 6 | 5.192649000  | -0.557932000 | 0.703944000  |
| 1  | 0.110353000  | 1.561943000  | -0.309118000 | 1 | 4.008923000  | -2.100472000 | -2.074390000 |
| 8  | 1.098993000  | -1.771674000 | -2.289413000 | 1 | 3.694745000  | 2.010001000  | -0.913783000 |
| 16 | -1.987580000 | -0.135541000 | 3.547141000  | 1 | 5.282651000  | -2.579832000 | 0.001594000  |
| 1  | -1.727784000 | -1.957494000 | 1.312699000  | 1 | 4.954161000  | 1.548029000  | 1.140418000  |
| 6  | 2.902505000  | 0.284460000  | -2.848153000 | 8 | 5.893788000  | -0.920061000 | 1.819454000  |
| 1  | 3.210363000  | 1.210883000  | -3.331328000 | 6 | 6.170693000  | 0.094948000  | 2.778857000  |
| 1  | 2.972247000  | -0.522564000 | -3.576664000 | 1 | 6.784998000  | 0.886345000  | 2.342429000  |
| 6  | -2.273793000 | 2.785612000  | -0.514733000 | 1 | 5.244762000  | 0.519802000  | 3.174225000  |
| 8  | -2.659200000 | 3.032076000  | -1.631607000 | 1 | 6.719988000  | -0.393465000 | 3.580543000  |
| 8  | -1.916401000 | 3.678386000  | 0.383564000  | 6 | 0.769729000  | -0.929837000 | 0.839541000  |
| 6  | -2.004002000 | 5.058476000  | -0.028406000 | 1 | 0.907627000  | -2.013312000 | 0.805826000  |
| 1  | -1.347483000 | 5.228189000  | -0.880673000 | 1 | 1.636952000  | -0.456149000 | 0.371422000  |
| 1  | -3.034304000 | 5.298327000  | -0.287122000 | 1 | 0.739957000  | -0.616638000 | 1.885970000  |
| 1  | -1.678281000 | 5.636154000  | 0.831111000  | 1 | -3.926039000 | 0.739251000  | -1.224635000 |

### PROD-DBCO

E(electronic) = -1907.52569243  
 Zero-point correction= 0.424917 (Hartree/Particle)  
 Thermal correction to Energy= 0.454278  
 Thermal correction to Enthalpy= 0.455222  
 Thermal correction to Gibbs Free Energy= 0.363693  
 Sum of electronic and zero-point Energies= -1907.100776  
 Sum of electronic and thermal Energies= -1907.071415  
 Sum of electronic and thermal Enthalpies= -1907.070471  
 Sum of electronic and thermal Free Energies= -1907.162000

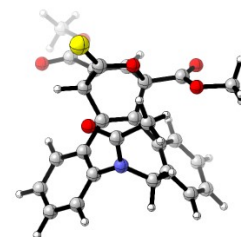

|    |              |              |              |   |              |              |              |
|----|--------------|--------------|--------------|---|--------------|--------------|--------------|
| 6  | -1.449176000 | -0.872228000 | -1.055277000 | 1 | -2.113531000 | 5.341947000  | -1.692521000 |
| 6  | -0.363133000 | 2.067550000  | -0.582123000 | 1 | -3.297544000 | 3.742420000  | -0.203942000 |
| 6  | -3.311234000 | 0.561591000  | 0.095737000  | 1 | -0.128638000 | -2.151720000 | -2.182070000 |
| 1  | -3.861143000 | 0.031969000  | 0.872814000  | 1 | -1.875407000 | -3.111686000 | -3.602658000 |
| 6  | -2.776615000 | -0.438998000 | -0.914456000 | 1 | -4.242560000 | -2.361673000 | -3.326093000 |
| 6  | -1.664079000 | 2.361464000  | -0.150963000 | 1 | -4.779598000 | -0.650941000 | -1.636207000 |
| 6  | -0.265930000 | -0.414320000 | -0.276082000 | 6 | -1.838154000 | 1.260572000  | 1.975444000  |
| 6  | 0.273265000  | 0.805158000  | -0.176017000 | 8 | -0.999139000 | 2.035737000  | 2.433400000  |
| 6  | 0.674882000  | -1.459237000 | 0.349408000  | 6 | -2.344956000 | 0.092132000  | 2.776434000  |
| 6  | 1.681388000  | 0.811254000  | 0.424806000  | 1 | -3.391626000 | 0.240428000  | 3.052390000  |
| 1  | 2.124068000  | 1.799036000  | 0.488785000  | 1 | -2.268405000 | -0.835520000 | 2.205271000  |
| 6  | 1.998892000  | -1.414971000 | -0.379056000 | 1 | -1.743763000 | 0.018943000  | 3.680313000  |
| 1  | 2.414995000  | -2.296097000 | -0.848636000 | 1 | -4.040579000 | 1.193836000  | -0.416730000 |
| 6  | 2.539102000  | -0.200865000 | -0.320910000 | 6 | 0.069027000  | -2.851213000 | 0.485598000  |
| 8  | 0.939482000  | -1.014872000 | 1.728722000  | 8 | 0.499252000  | -3.823670000 | -0.080211000 |
| 6  | 1.546635000  | 0.169649000  | 1.798890000  | 8 | -0.983599000 | -2.829612000 | 1.275918000  |
| 16 | 2.121846000  | 0.754801000  | 3.206172000  | 6 | -1.701566000 | -4.071612000 | 1.415444000  |
| 7  | -2.332267000 | 1.437569000  | 0.716854000  | 1 | -1.047427000 | -4.830523000 | 1.842300000  |
| 6  | -2.291782000 | 3.533554000  | -0.550390000 | 1 | -2.527636000 | -3.853241000 | 2.085661000  |
| 6  | 0.312713000  | 2.990118000  | -1.382215000 | 1 | -2.068220000 | -4.387838000 | 0.438821000  |
| 6  | -1.621636000 | 4.428943000  | -1.379264000 | 6 | 3.858955000  | 0.198252000  | -0.857349000 |
| 6  | -0.317969000 | 4.161300000  | -1.787470000 | 8 | 4.324436000  | 1.308397000  | -0.723600000 |
| 6  | -1.157262000 | -1.836432000 | -2.038845000 | 8 | 4.467105000  | -0.789247000 | -1.503780000 |
| 6  | -2.139330000 | -2.376524000 | -2.852174000 | 6 | 5.753965000  | -0.476758000 | -2.066343000 |
| 6  | -3.755562000 | -0.993109000 | -1.748934000 | 1 | 5.655138000  | 0.327603000  | -2.794501000 |
| 6  | -3.457325000 | -1.954297000 | -2.700493000 | 1 | 6.443888000  | -0.186667000 | -1.274688000 |
| 1  | 1.328538000  | 2.775968000  | -1.698657000 | 1 | 6.088342000  | -1.390351000 | -2.549074000 |
| 1  | 0.208445000  | 4.864650000  | -2.421285000 |   |              |              |              |

### PROD-Si7HT

E(electronic) = -2258.58744853  
 Zero-point correction= 0.481917 (Hartree/Particle)  
 Thermal correction to Energy= 0.516785  
 Thermal correction to Enthalpy= 0.517730  
 Thermal correction to Gibbs Free Energy= 0.414976  
 Sum of electronic and zero-point Energies= -2258.105532  
 Sum of electronic and thermal Energies= -2258.070663  
 Sum of electronic and thermal Enthalpies= -2258.069719  
 Sum of electronic and thermal Free Energies= -2258.172473

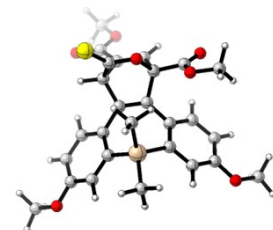

|    |              |              |              |   |              |              |              |
|----|--------------|--------------|--------------|---|--------------|--------------|--------------|
| 6  | -1.445641000 | -0.611527000 | -0.485704000 | 1 | -1.224470000 | -2.174017000 | -1.952599000 |
| 6  | 0.780562000  | 1.707981000  | -0.135225000 | 6 | 1.781310000  | 2.390627000  | -0.832418000 |
| 14 | -1.702761000 | 1.571655000  | 1.347912000  | 1 | 2.620036000  | 1.842266000  | -1.249766000 |

|    |              |              |              |   |              |              |              |
|----|--------------|--------------|--------------|---|--------------|--------------|--------------|
| 6  | -2.338793000 | 0.313357000  | 0.096411000  | 6 | 1.722716000  | 3.764822000  | -1.032867000 |
| 6  | -0.305578000 | 2.432807000  | 0.407796000  | 1 | 2.508363000  | 4.256927000  | -1.589819000 |
| 6  | -0.031214000 | -0.706590000 | -0.059655000 | 6 | 0.648122000  | 4.478457000  | -0.504770000 |
| 6  | 0.908375000  | 0.249037000  | 0.029865000  | 6 | -0.350842000 | 3.810109000  | 0.209262000  |
| 6  | 0.551231000  | -2.075918000 | 0.352713000  | 1 | -1.164600000 | 4.405965000  | 0.610770000  |
| 6  | 2.292719000  | -0.312277000 | 0.403619000  | 6 | -3.239716000 | -1.473380000 | -1.885769000 |
| 6  | 1.701623000  | -2.412620000 | -0.559788000 | 1 | -3.561417000 | -2.158471000 | -2.658519000 |
| 6  | 2.640343000  | -1.471245000 | -0.506641000 | 6 | -4.124093000 | -0.571063000 | -1.298442000 |
| 8  | 1.119168000  | -1.895453000 | 1.701829000  | 6 | -3.665557000 | 0.320128000  | -0.324256000 |
| 6  | 2.039235000  | -0.939612000 | 1.763304000  | 1 | -4.380454000 | 1.020022000  | 0.097853000  |
| 16 | 2.753766000  | -0.523526000 | 3.170060000  | 6 | -1.103831000 | 0.727163000  | 2.909496000  |
| 6  | 3.932671000  | -1.483697000 | -1.226779000 | 1 | -0.524503000 | -0.174955000 | 2.703602000  |
| 8  | 4.756490000  | -0.600192000 | -1.133385000 | 1 | -0.487456000 | 1.406409000  | 3.505221000  |
| 8  | 4.083673000  | -2.559761000 | -1.989846000 | 1 | -1.969571000 | 0.439502000  | 3.514030000  |
| 6  | 5.310274000  | -2.635341000 | -2.738172000 | 6 | -3.043320000 | 2.807845000  | 1.749172000  |
| 1  | 5.384626000  | -1.785106000 | -3.415343000 | 1 | -3.416674000 | 3.316249000  | 0.856694000  |
| 1  | 6.160130000  | -2.650687000 | -2.056610000 | 1 | -3.884306000 | 2.303112000  | 2.233196000  |
| 1  | 5.251573000  | -3.564801000 | -3.296819000 | 1 | -2.668280000 | 3.565098000  | 2.443623000  |
| 1  | 3.065436000  | 0.444477000  | 0.464223000  | 8 | -5.446535000 | -0.481662000 | -1.616932000 |
| 6  | -0.493609000 | -3.173552000 | 0.502862000  | 6 | -5.946772000 | -1.373700000 | -2.609170000 |
| 8  | -0.558375000 | -4.131475000 | -0.224980000 | 1 | -5.443980000 | -1.211688000 | -3.565541000 |
| 8  | -1.314552000 | -2.915627000 | 1.500876000  | 1 | -5.822917000 | -2.412819000 | -2.294901000 |
| 6  | -2.416590000 | -3.830644000 | 1.664103000  | 1 | -7.005346000 | -1.145252000 | -2.709051000 |
| 1  | -3.031150000 | -3.817985000 | 0.763490000  | 8 | 0.494075000  | 5.825623000  | -0.630040000 |
| 1  | -2.039461000 | -4.834312000 | 1.855093000  | 6 | 1.501476000  | 6.541939000  | -1.339889000 |
| 1  | -2.975646000 | -3.460001000 | 2.517907000  | 1 | 2.472114000  | 6.432397000  | -0.850505000 |
| 1  | 1.716154000  | -3.322572000 | -1.144265000 | 1 | 1.565310000  | 6.198109000  | -2.374816000 |
| 6  | -1.910530000 | -1.483372000 | -1.472447000 | 1 | 1.195897000  | 7.585336000  | -1.318713000 |

### 3. Kinetics determination and cycloadducts characterization details

#### 3.1. 2<sup>nd</sup> order rate constant determination between PyrS2 and dienophiles

##### *Kinetics between PyrS2 and exo-BCN*

Reaction mixtures consisting of PyrS2 (0.4 mM) and exo-BCN (10 mM, 15 mM, and 20 mM) in 50% acetonitrile/water were prepared in separate wells of a 96-well plate at 25 °C. The reaction was monitored by recording the disappearance of the characteristic absorption of pyranthiones (ranging from 390 nm to 440 nm) every 1 or 2 minutes. The pseudo 1<sup>st</sup> order rate constants were derived from an exponential fitting by plotting the absorbance against the reaction time. The 2<sup>nd</sup> order rate constants were derived from linear fitting of the pseudo 1<sup>st</sup> order rates with the concentration of exo-BCN.

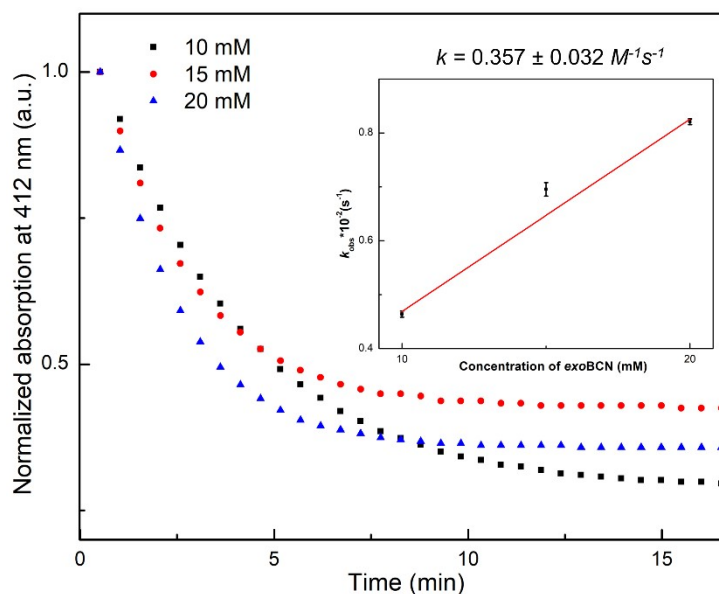

**Figure S1** Kinetics evaluation of ligation between **PyrS2** and exo-BCN (10, 20, and 40 mM) in 50% acetonitrile/water.

##### *Kinetics between PyrS2 and DMBCN*

Kinetics were determined using PyrS2 (0.4 mM) and DMBCN (4 mM, 6 mM, and 8 mM) in 50% acetonitrile/water using similar protocol as PyrS2 and exo-BCN.

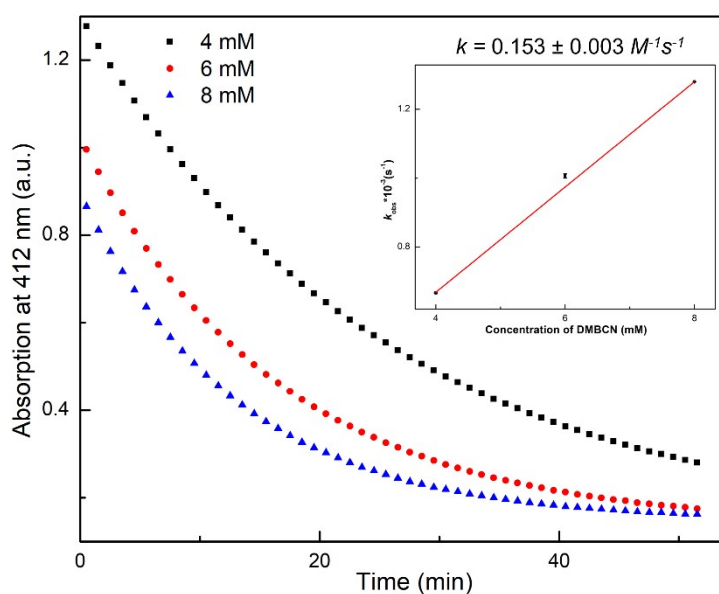

**Figure S2** Kinetics evaluation of ligation between **PyrS2** and DMBCN (4, 6, and 8 mM) in 50% acetonitrile/water.

### Reactivity tests between PyrS2 and DBCO

Reactivity between PyrS2 (5 mM) and DBCO (5 mM) were mixed in deuterium methanol and the reaction was monitored by  $^1\text{H}$  NMR.

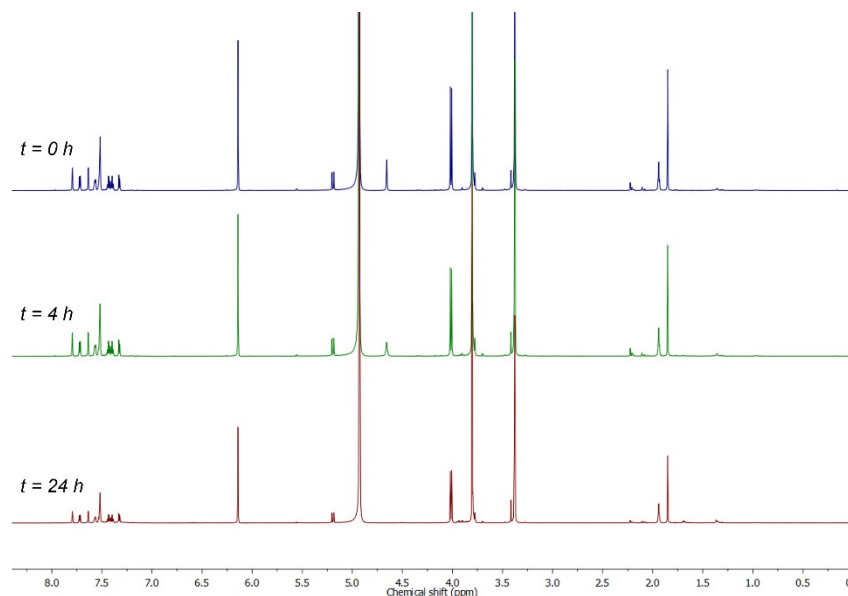

**Figure S3** Reactivity evaluation between **PyrS2** and DBCO (5 mM each) in deuterium methanol with different incubation time points.

### Kinetics and reactivity determination between PyrS2 and Cp

Reactivity tests between PyrS2 (5 mM) and Cp (5 mM) were analyzed by HPLC. Kinetics were similarly determined using PyrS2 (0.4 mM) and Cp (4 mM, 6 mM, and 8 mM).

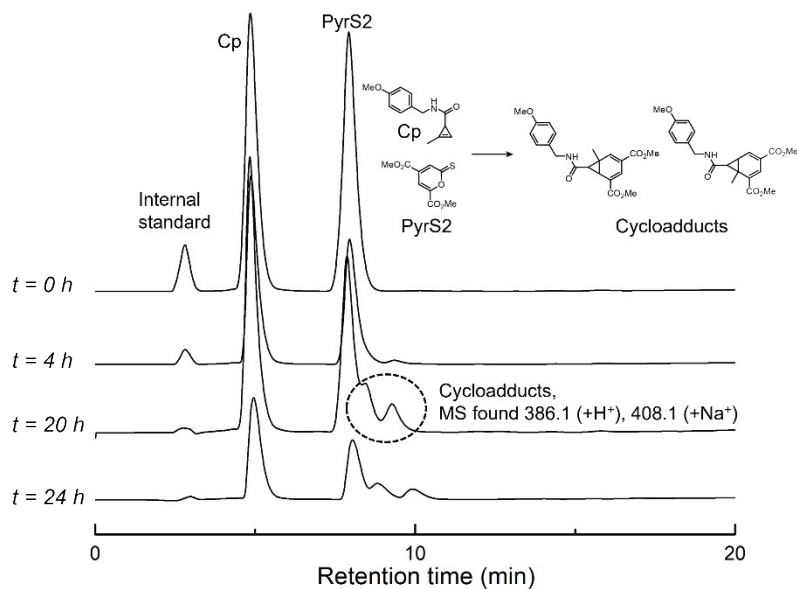

**Figure S4** Reaction analysis between **PyrS2** and Cp (5 mM each) in 50% acetonitrile/water using HPLC.

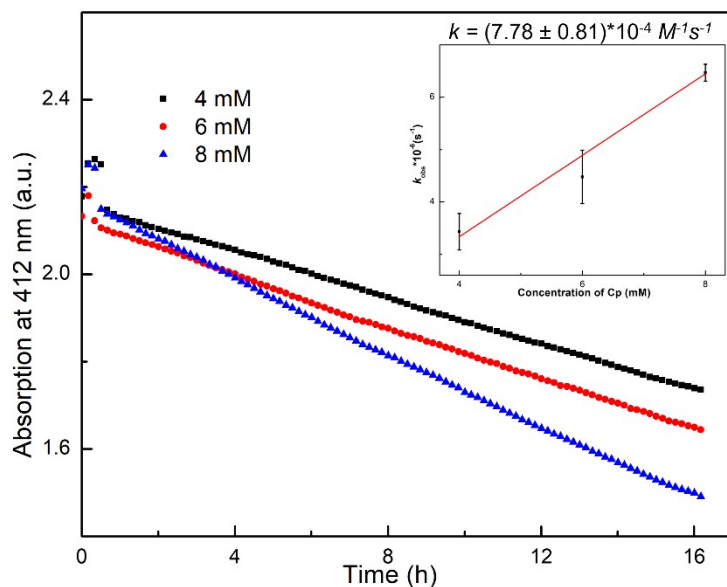

**Figure S5** Kinetics evaluation of ligation between **PyrS2** and Cp (4, 6, and 8 mM) in 50% acetonitrile/water.

#### Kinetics between *PyrS2* and *Si-7HT*

Reaction mixtures consisting of *PyrS2* (0.1 mM) and uncaged Cp-7HT (1 mM, 1.125 mM, and 1.25 mM, illuminated under 365 nm LED for 1 min in quartz test tube) in acetonitrile were prepared in separate wells of a 96-well plate at 25 °C. The reaction was monitored by recording the disappearance of the characteristic absorption of pyranthiones (ranging from 390 nm to 440 nm) every 31 seconds. The pseudo 1<sup>st</sup> order rate constants were derived from an exponential fitting by plotting the absorbance against the reaction time. The 2<sup>nd</sup> order rate constants were derived from linear fitting of the pseudo 1<sup>st</sup> order rates with the concentration of Cp-7HT.

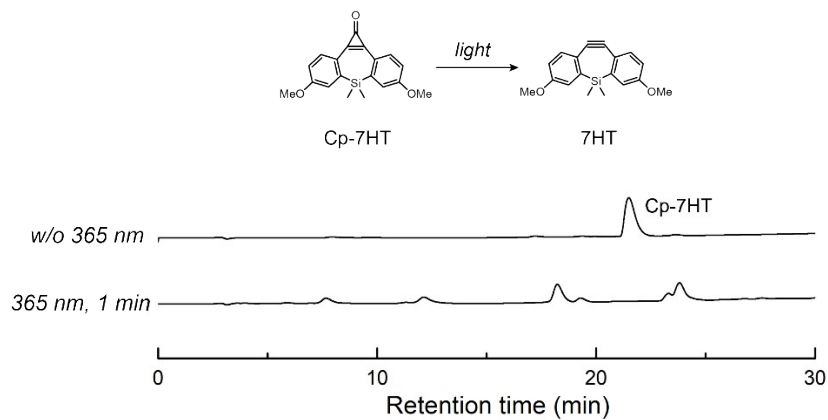

**Figure S6** Uncaging analysis of Cp-7HT (2 mM) under illumination of 365 nm LED for 1 min from HPLC in acetonitrile.

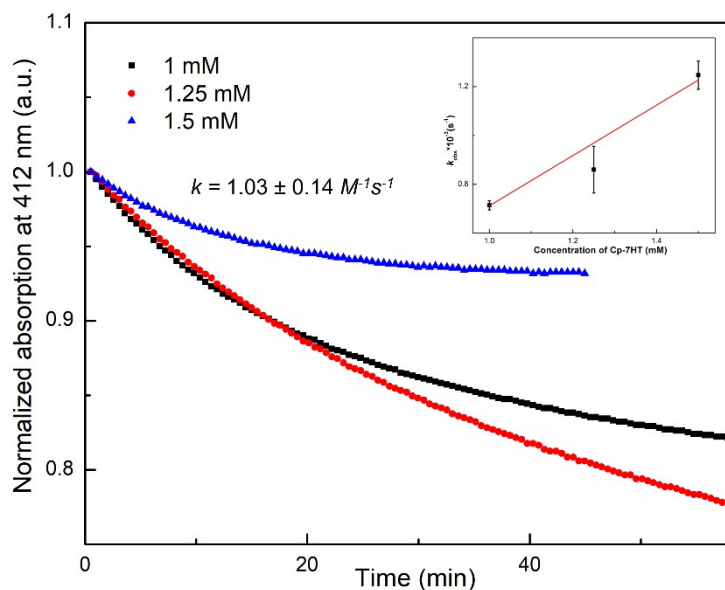

**Figure S7** Kinetics evaluation of ligation between **PyrS2** and uncaged Cp-7HT (1, 1.125, and 1.25 mM) in acetonitrile.

### 3.2. Cycloadducts characterization details

At the end of the kinetics experiments, the reaction mixtures were collected and purified by flash chromatography or preparative TLC for the cycloadducts isolation. For the reaction pairs with relatively slower reaction rates, the reaction was left for at least one week for the completion of the reaction before the cycloadducts isolation. The purified cycloadducts were characterized by  $^1\text{H}$  NMR, COSY and HRMS, respectively.

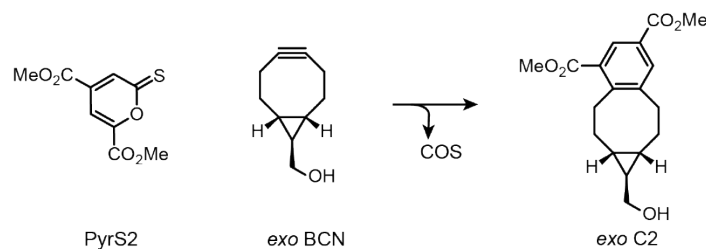

**Dimethyl (1*R*,1*aR*,9*aS*)-1-(hydroxymethyl)-1*a*,2,3,8,9,9*a*-hexahydro-1*H*-benzo[*a*]cyclopropa[*e*][8]annulene-4,6-dicarboxylate (exo C2).**  $^1\text{H}$  NMR (700 MHz, Acetonitrile- $d_3$ )  $\delta$  = 8.14 (d,  $J$  = 1.9 Hz, 1H), 7.89 (d,  $J$  = 1.8 Hz, 1H), 3.87 (d,  $J$  = 7.8 Hz, 6H), 3.21 (d,  $J$  = 11.0 Hz, 2H), 3.12 – 3.05 (m, 2H), 3.02 (br, 1H), 2.93 (dt,  $J$  = 14.6, 7.2 Hz, 1H), 2.61 – 2.55 (m, 1H), 2.44 – 2.39 (m, 2H), 1.37 (s, 2H), 0.63 (tt,  $J$  = 6.8, 4.5 Hz, 1H), 0.55 (s, 1H), 0.51 (s, 1H). HRMS (ESI): Calcd for  $\text{C}_{18}\text{H}_{22}\text{NaO}_5$  [ $\text{M}+\text{H}$ ] $^+$ : 341.1359, found: 341.1358.

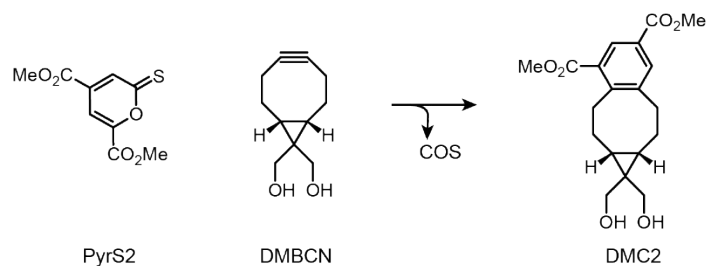

**Dimethyl (1*aR*,9*aS*)-1,1-bis(hydroxymethyl)-1*a*,2,3,8,9,9*a*-hexahydro-1*H*-benzo[*a*]cyclopropa[*e*][8]annulene-4,6-dicarboxylate (DMC2).**  $^1\text{H}$  NMR (700 MHz, Chloroform- $d$ )  $\delta$  = 8.30 (s, 1H), 7.92 (s, 1H), 3.92 (d,  $J$  = 2.4 Hz, 6H), 3.42 (s,

2H), 2.92 (dd,  $J = 14.8, 7.4$  Hz, 2H), 2.55 (dt,  $J = 15.7, 7.7$  Hz, 2H), 2.35 (t,  $J = 7.5$  Hz, 2H), 1.67 – 1.61 (m, 2H), 1.33 (d,  $J = 9.0$  Hz, 2H), 0.85 – 0.80 (m, 2H). HRMS (ESI): Calcd for  $C_{19}H_{25}O_6$   $[M+H]^+$ : 349.1646, found: 349.1642.

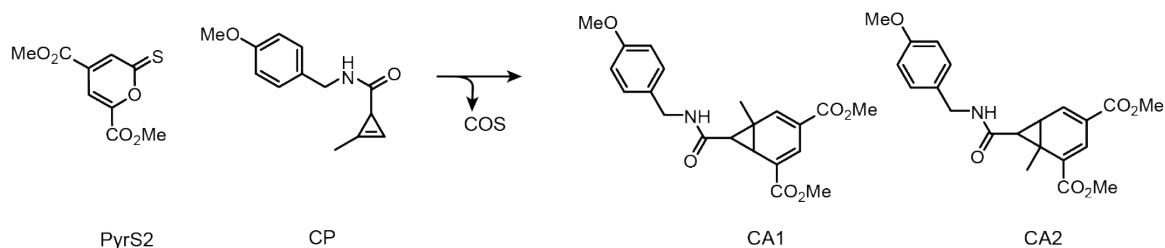

**Dimethyl 7-((4-methoxybenzyl)carbamoyl)-1-methylbicyclo[4.1.0]hepta-2,4-diene-2,4-dicarboxylate (CA).**  $^1H$  NMR (500 MHz, Chloroform- $d$ )  $\delta = 7.18 - 7.13$  (m, 2H), 7.05 (d,  $J = 7.2$  Hz, 1H), 6.87 – 6.83 (m, 2H), 6.66 (s, 1H), 5.71 (s, 1H), 4.36 (dd,  $J = 12.0, 5.6$  Hz, 2H), 3.84 – 3.77 (m, 9H), 2.33 (s, 1H), 2.02 (d,  $J = 1.5$  Hz, 1H), 1.25 (s, 3H). HRMS (ESI): Calcd for  $C_{21}H_{24}NO_6$   $[M+H]^+$ : 386.1598, found: 386.1597.

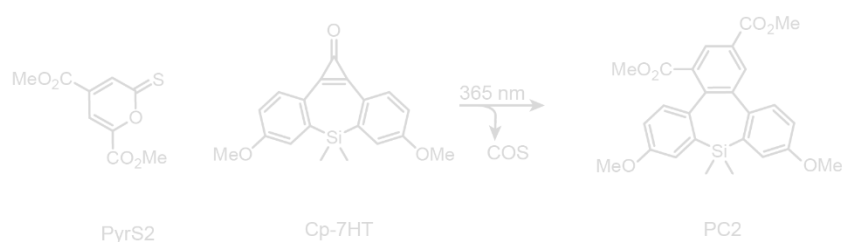

**Dimethyl 7,11-dimethoxy-9,9-dimethyl-9H-tribenzo[*b,d,f*]silepine-1,3-dicarboxylate (PC2).**  $^1H$  NMR (500 MHz,  $CDCl_3$ )  $\delta = 8.27$  (d,  $J = 1.9$  Hz, 1H), 8.19 (d,  $J = 1.9$  Hz, 1H), 7.41 (d,  $J = 8.4$  Hz, 1H), 7.08 – 6.99 (m, 3H), 6.92 (dd,  $J = 8.4, 2.8$  Hz, 1H), 6.77 (dd,  $J = 8.4, 2.8$  Hz, 1H), 3.96 (s, 3H), 3.80 (d,  $J = 11.3$  Hz, 6H), 3.54 (s, 3H), 0.76 (s, 3H), -0.12 (s, 3H). HRMS (ESI): Calcd for  $C_{26}H_{27}O_6Si$   $[M+H]^+$ : 463.1571, found: 463.1560.

#### 4. NMR spectra

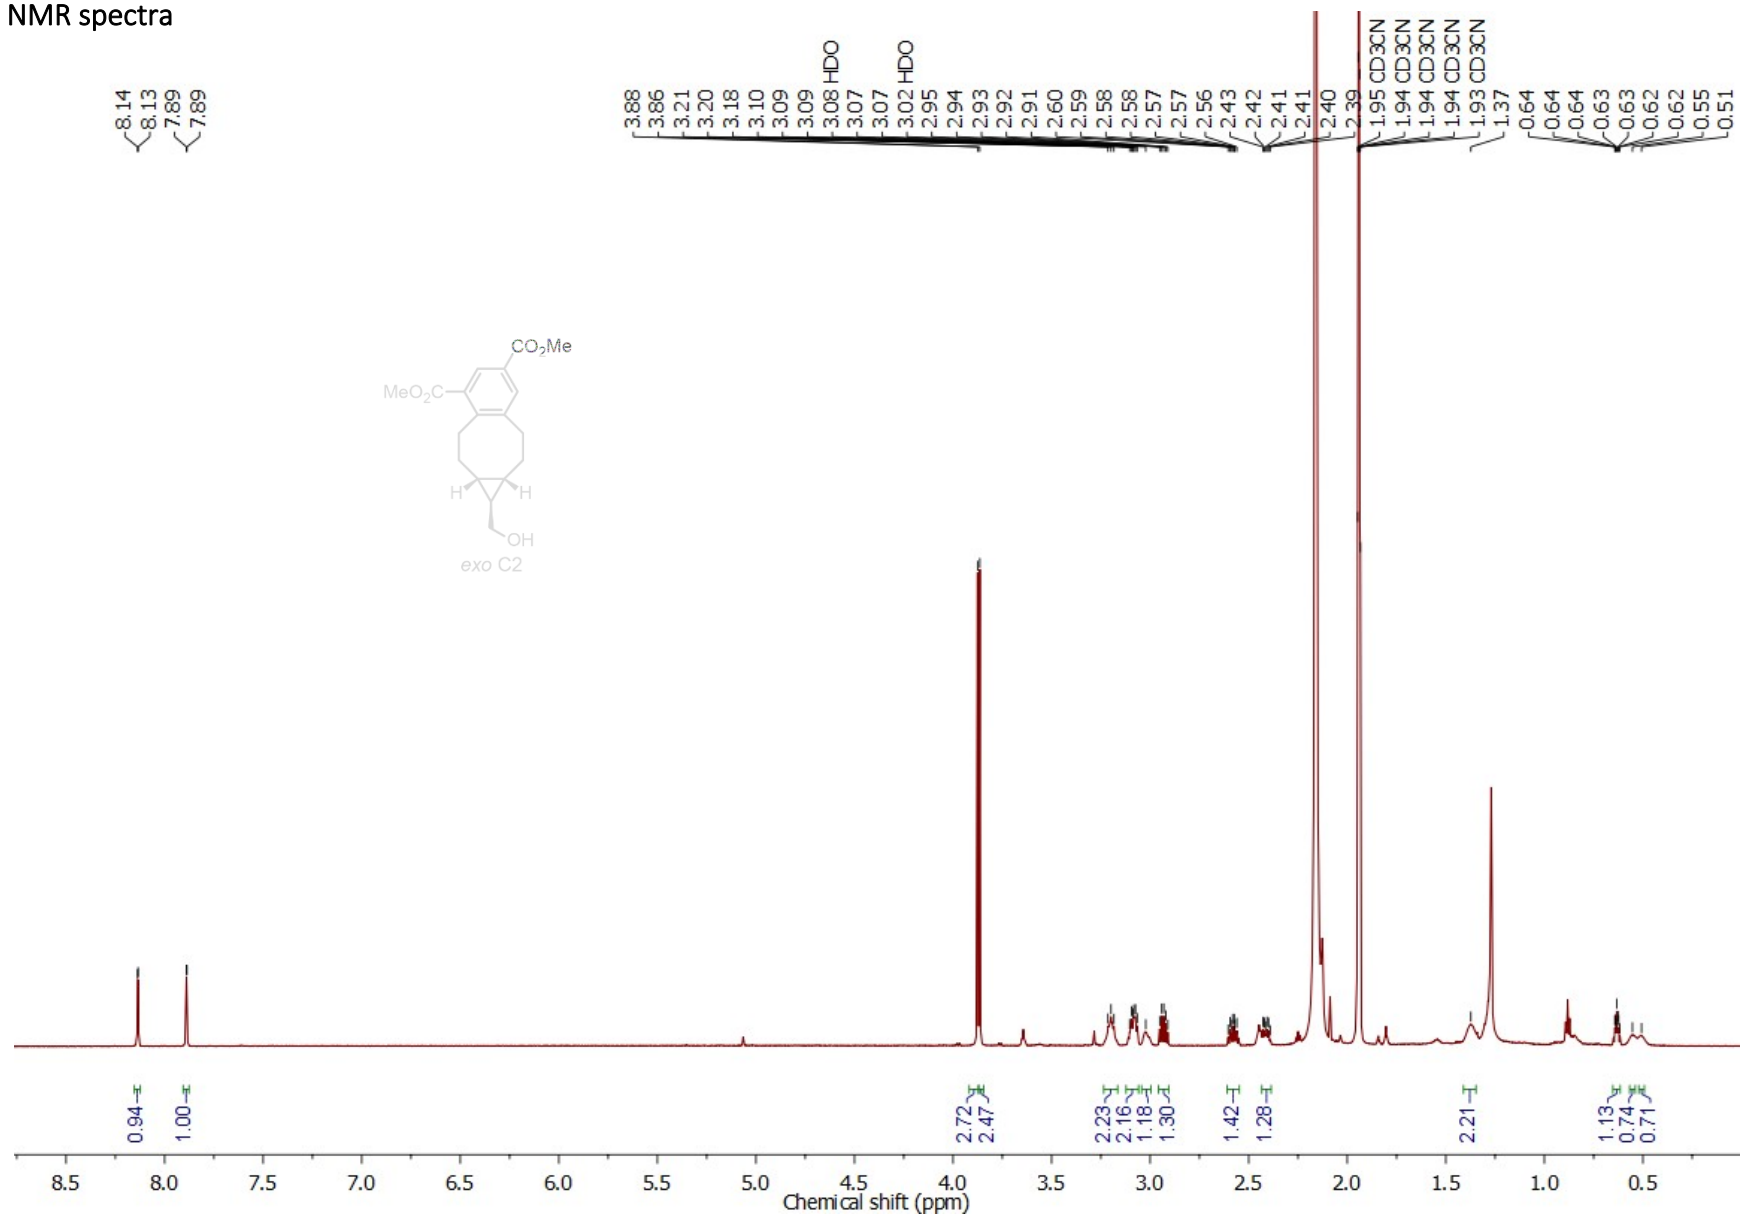



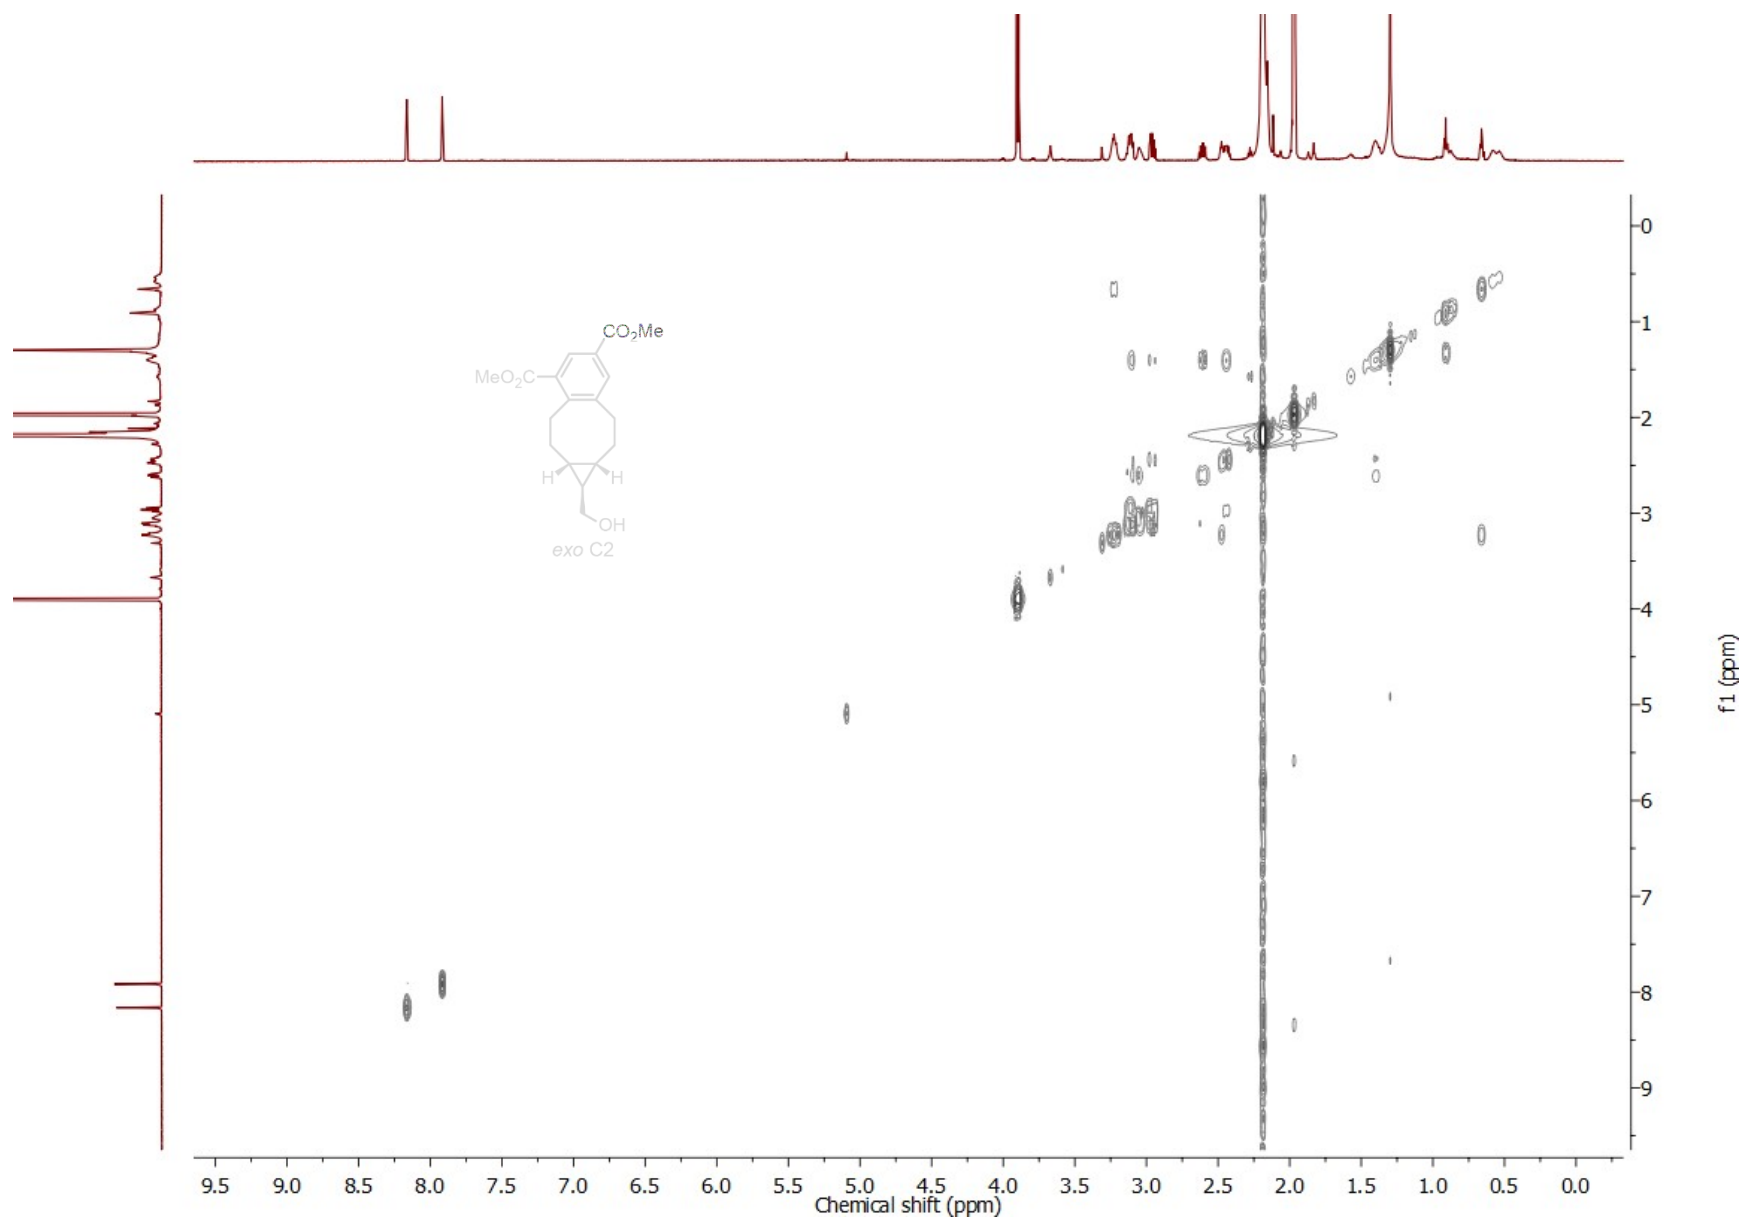

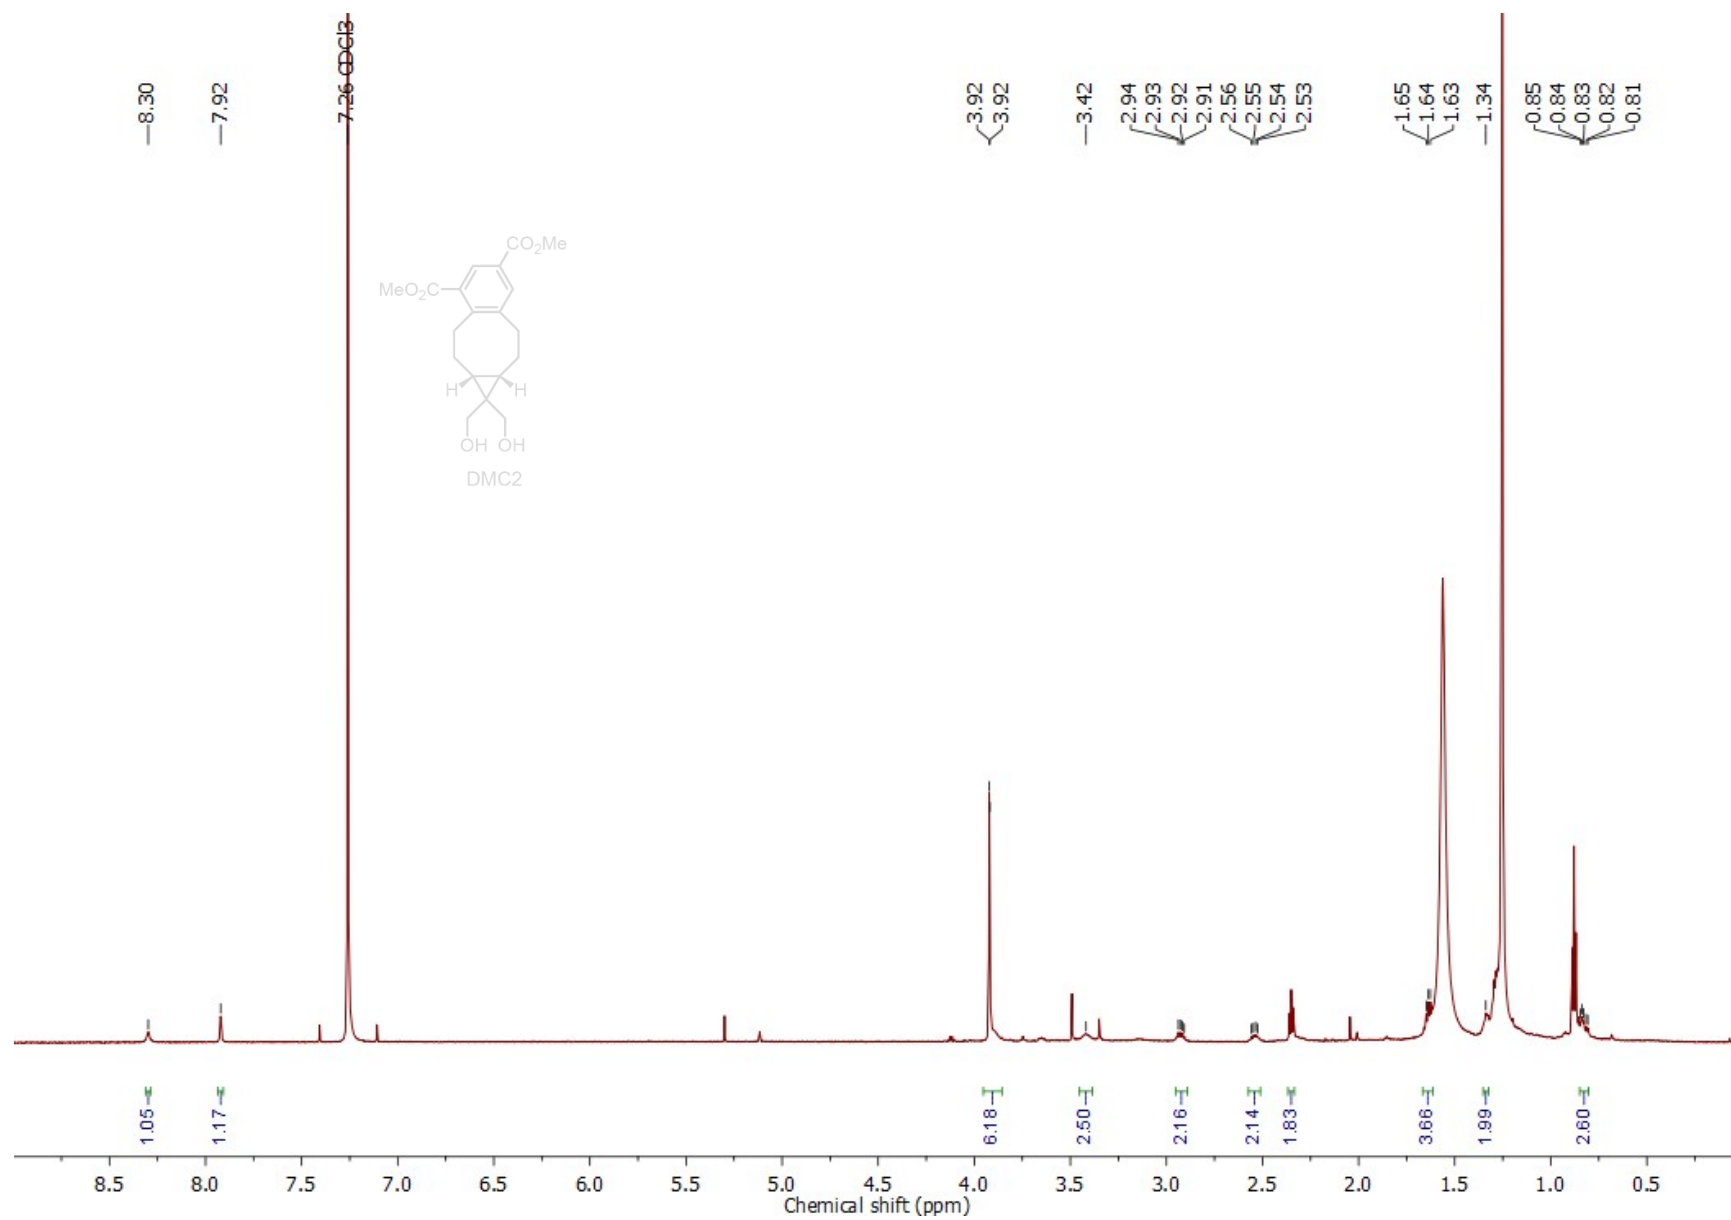

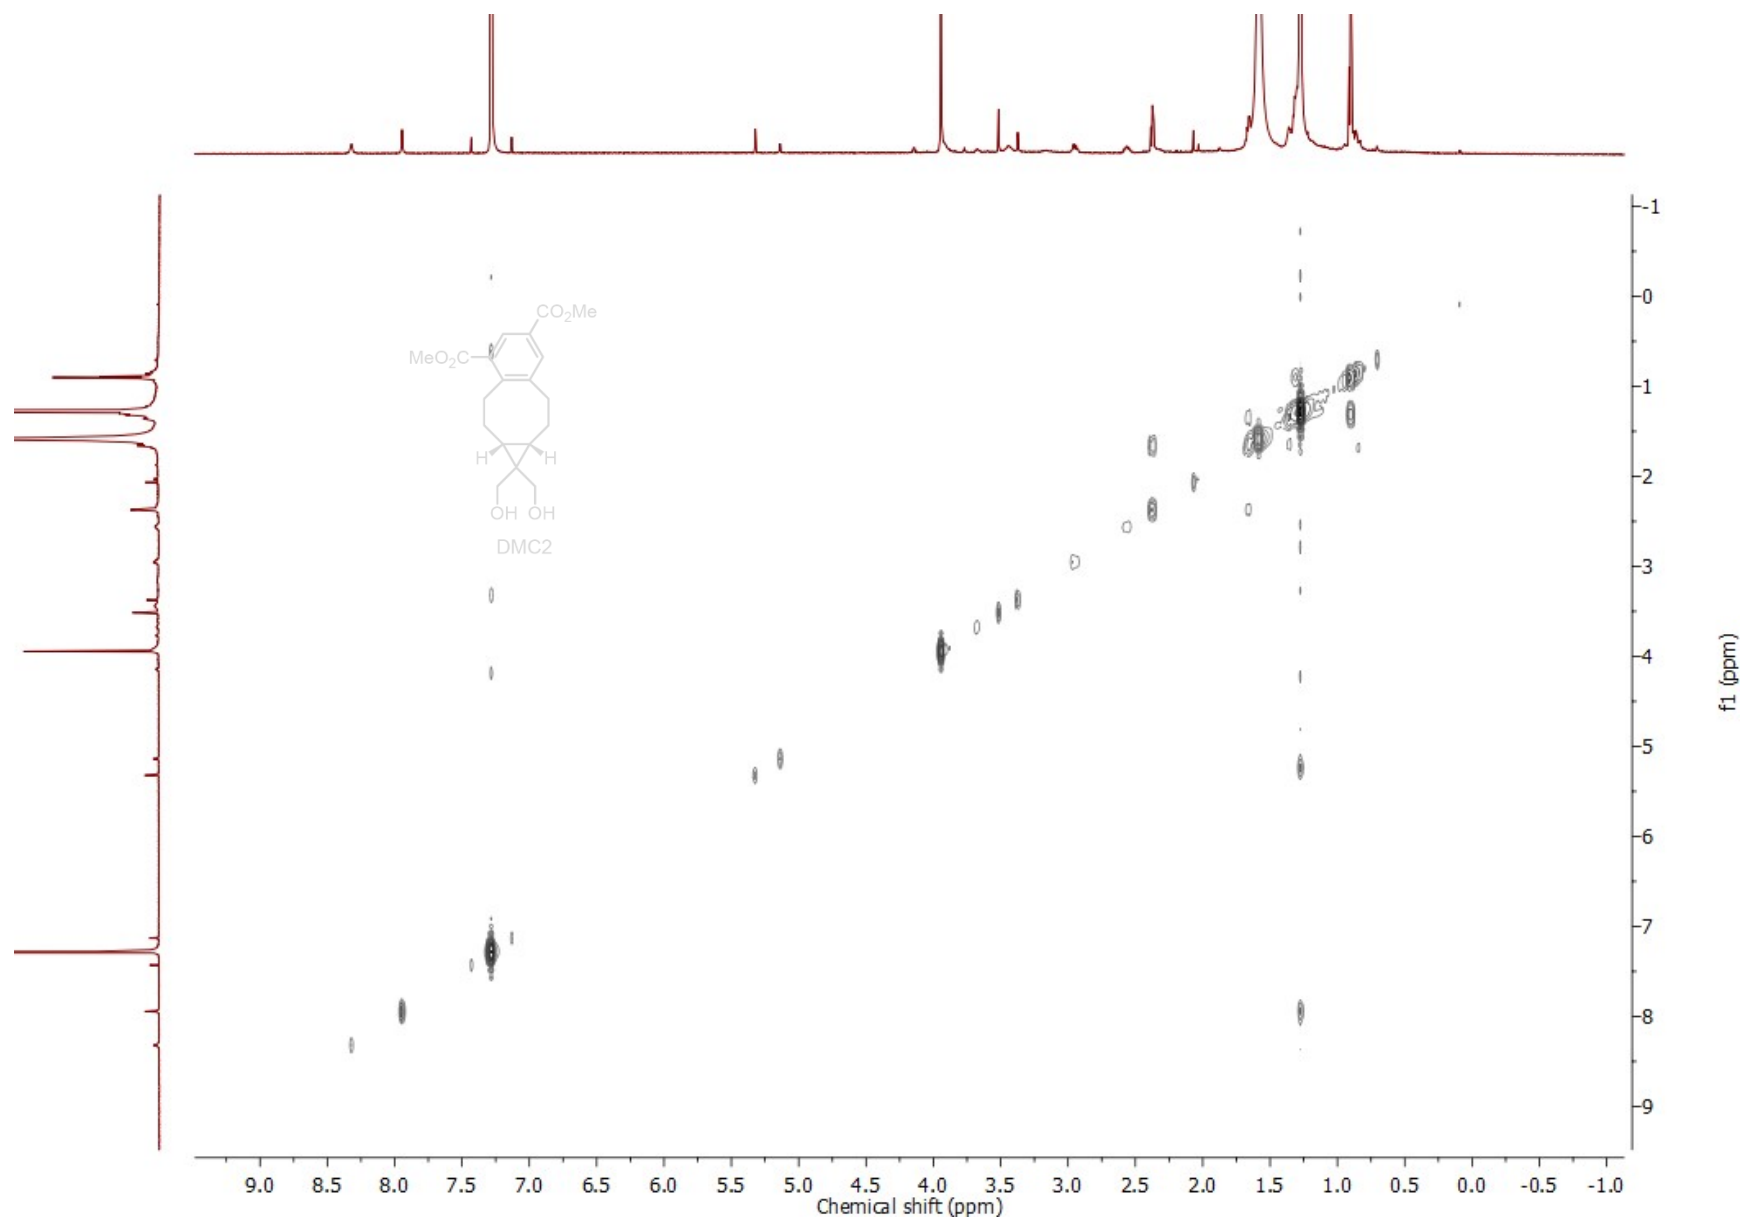

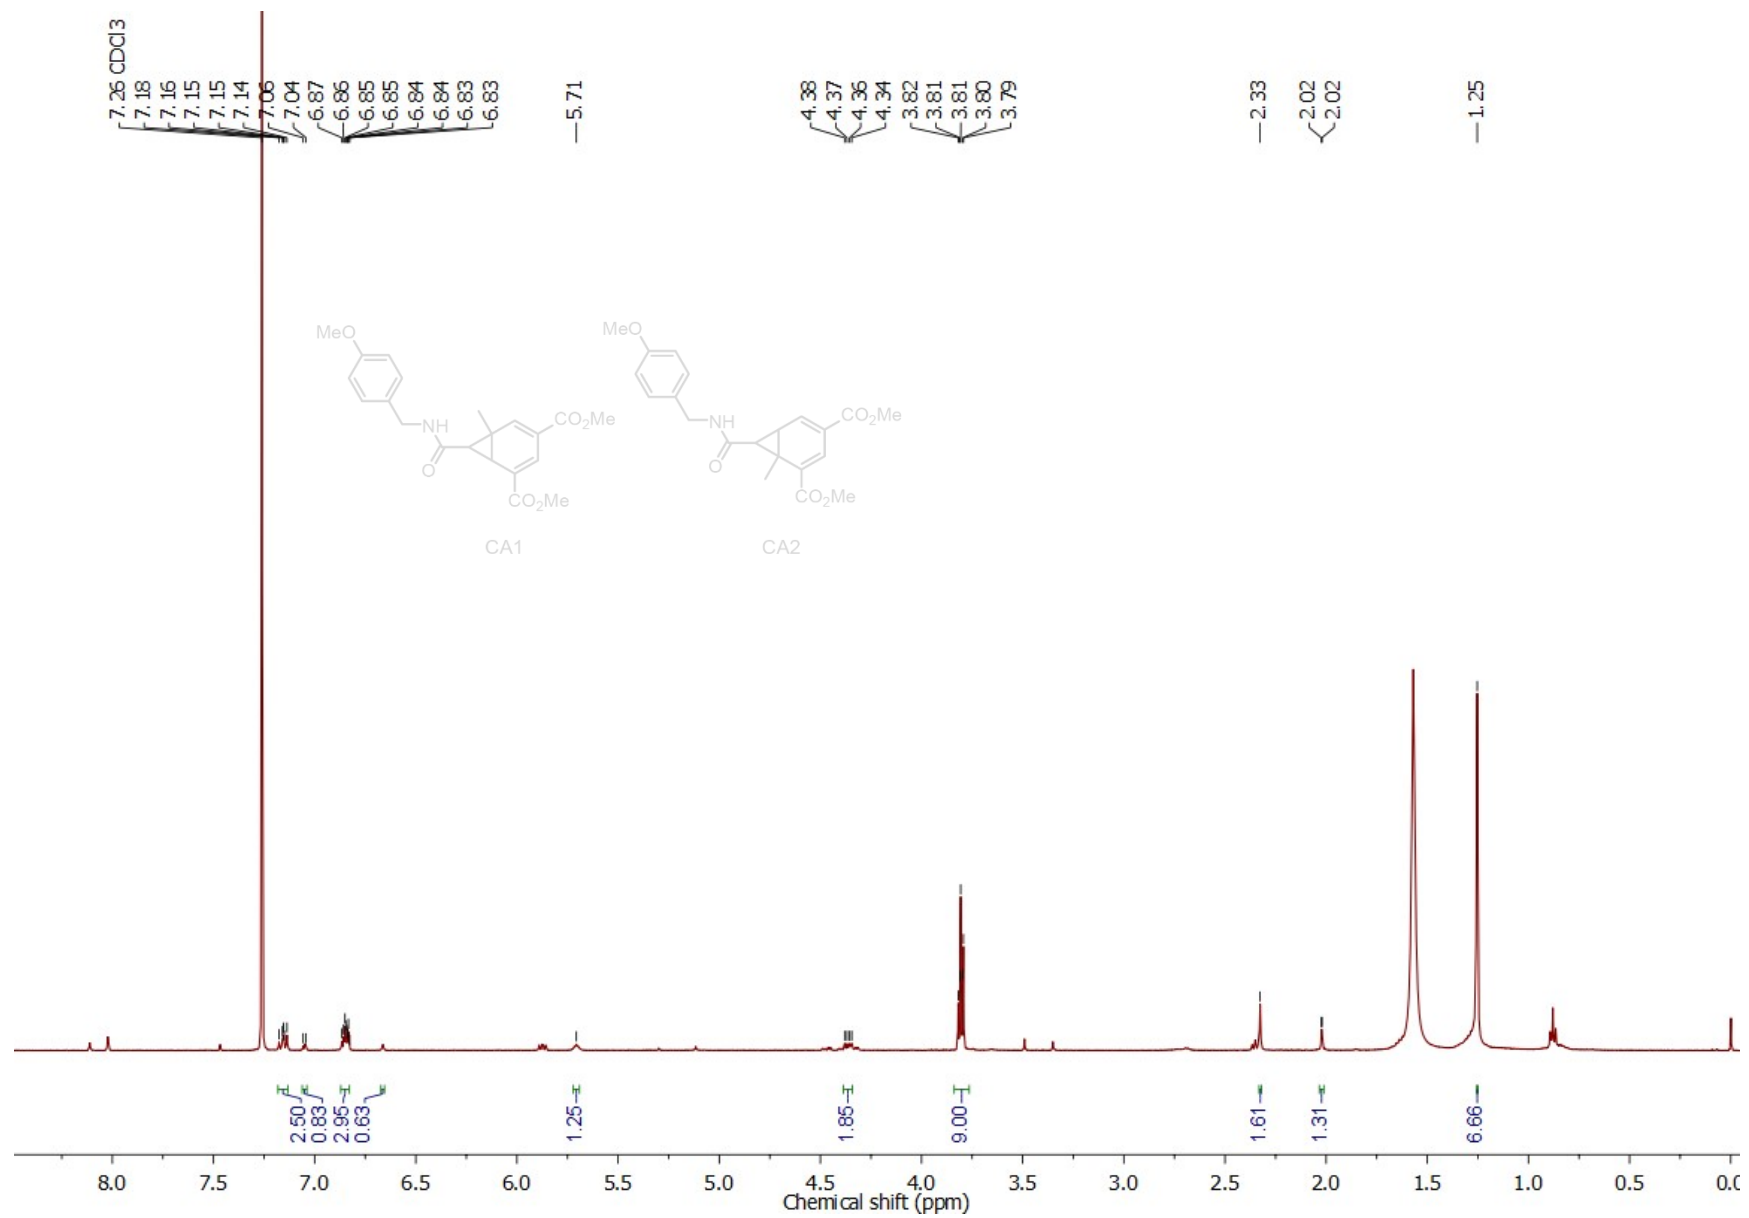

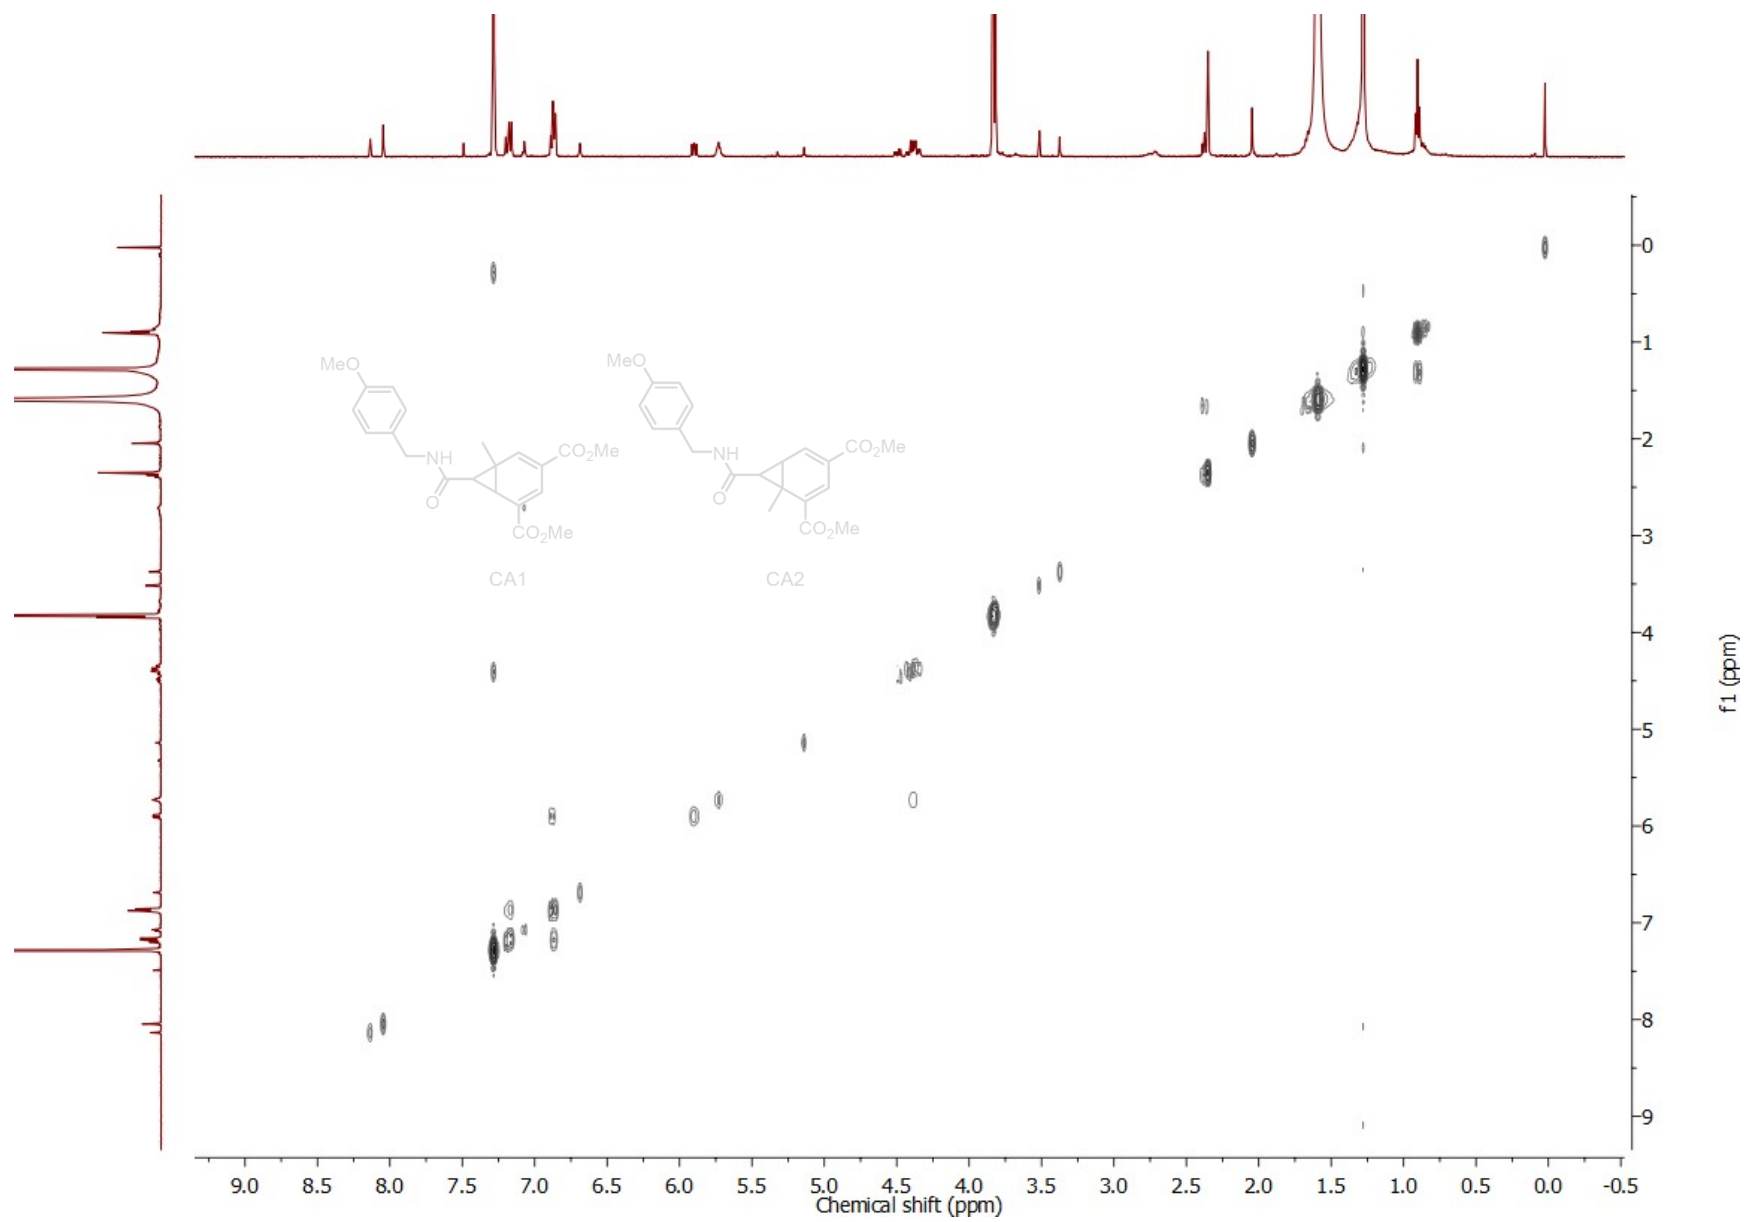

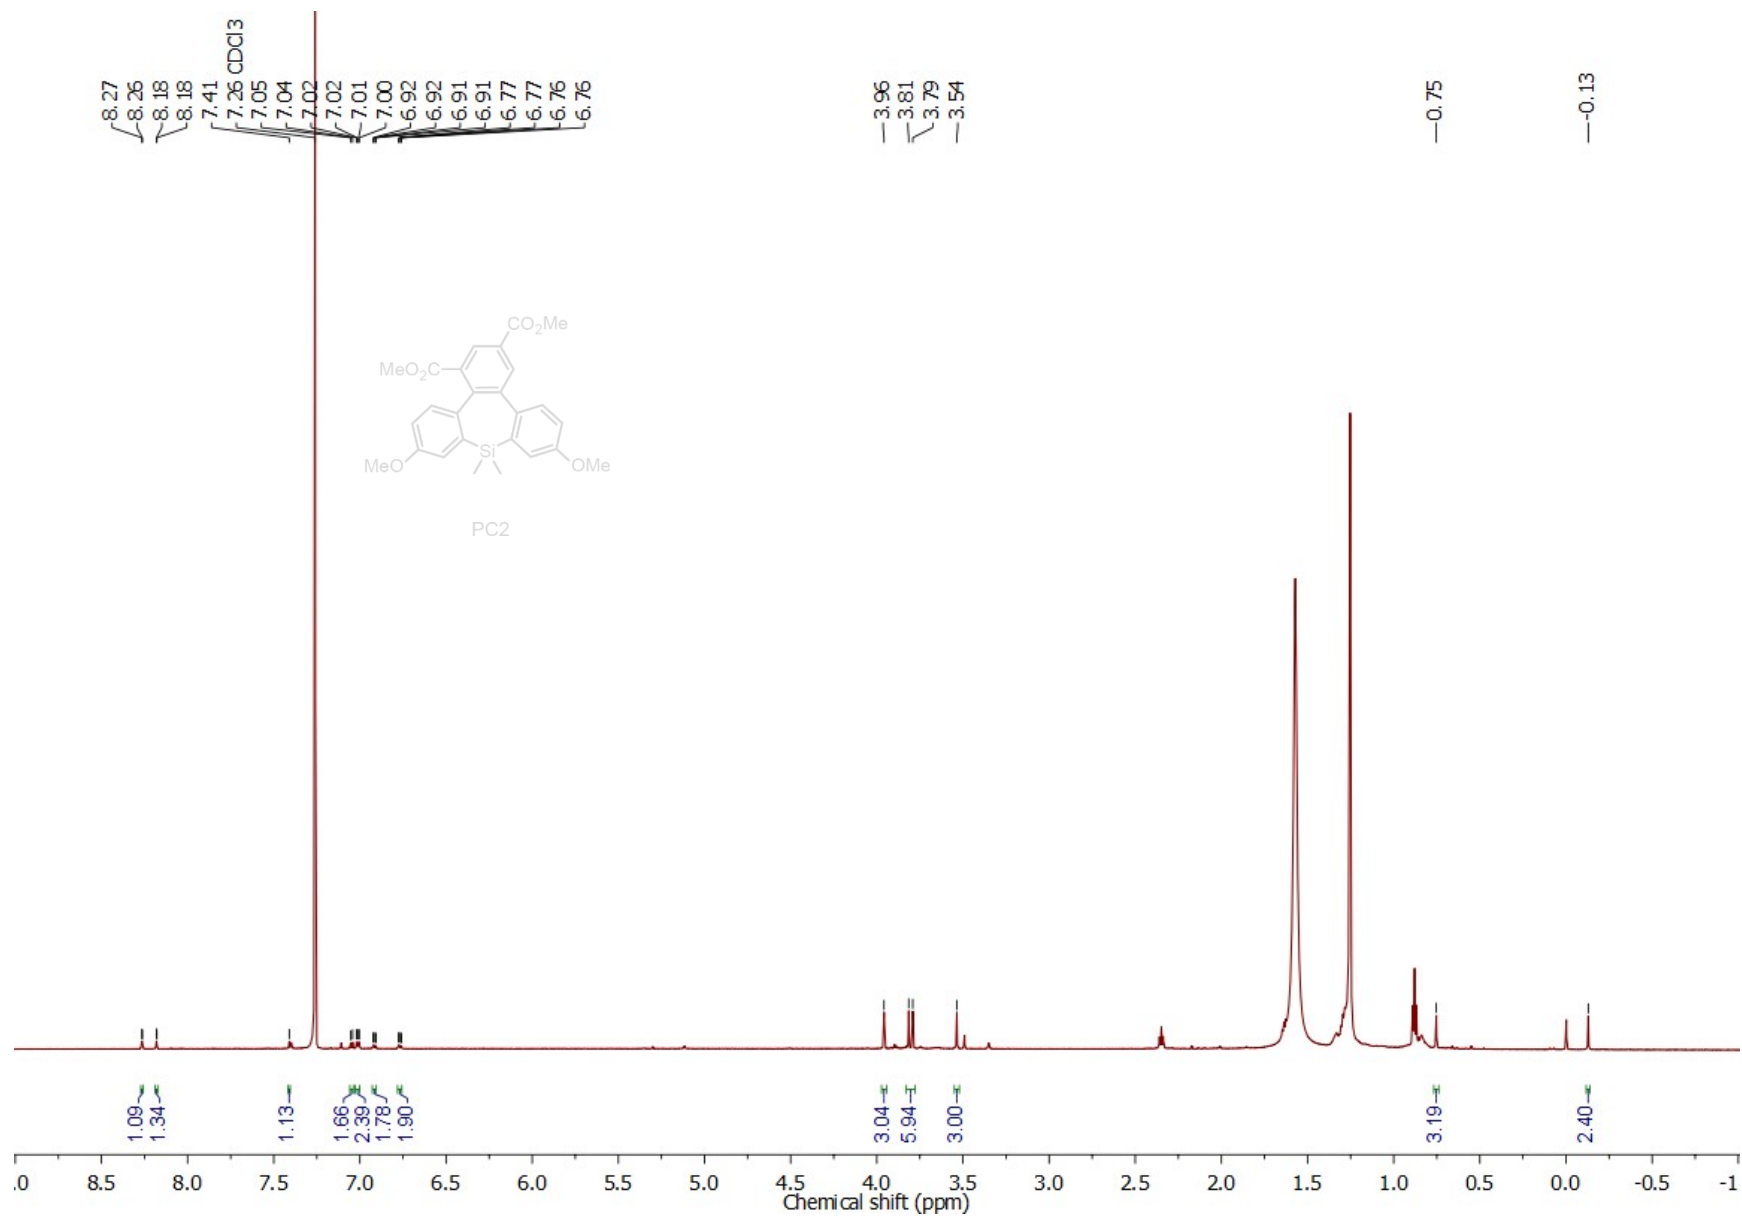

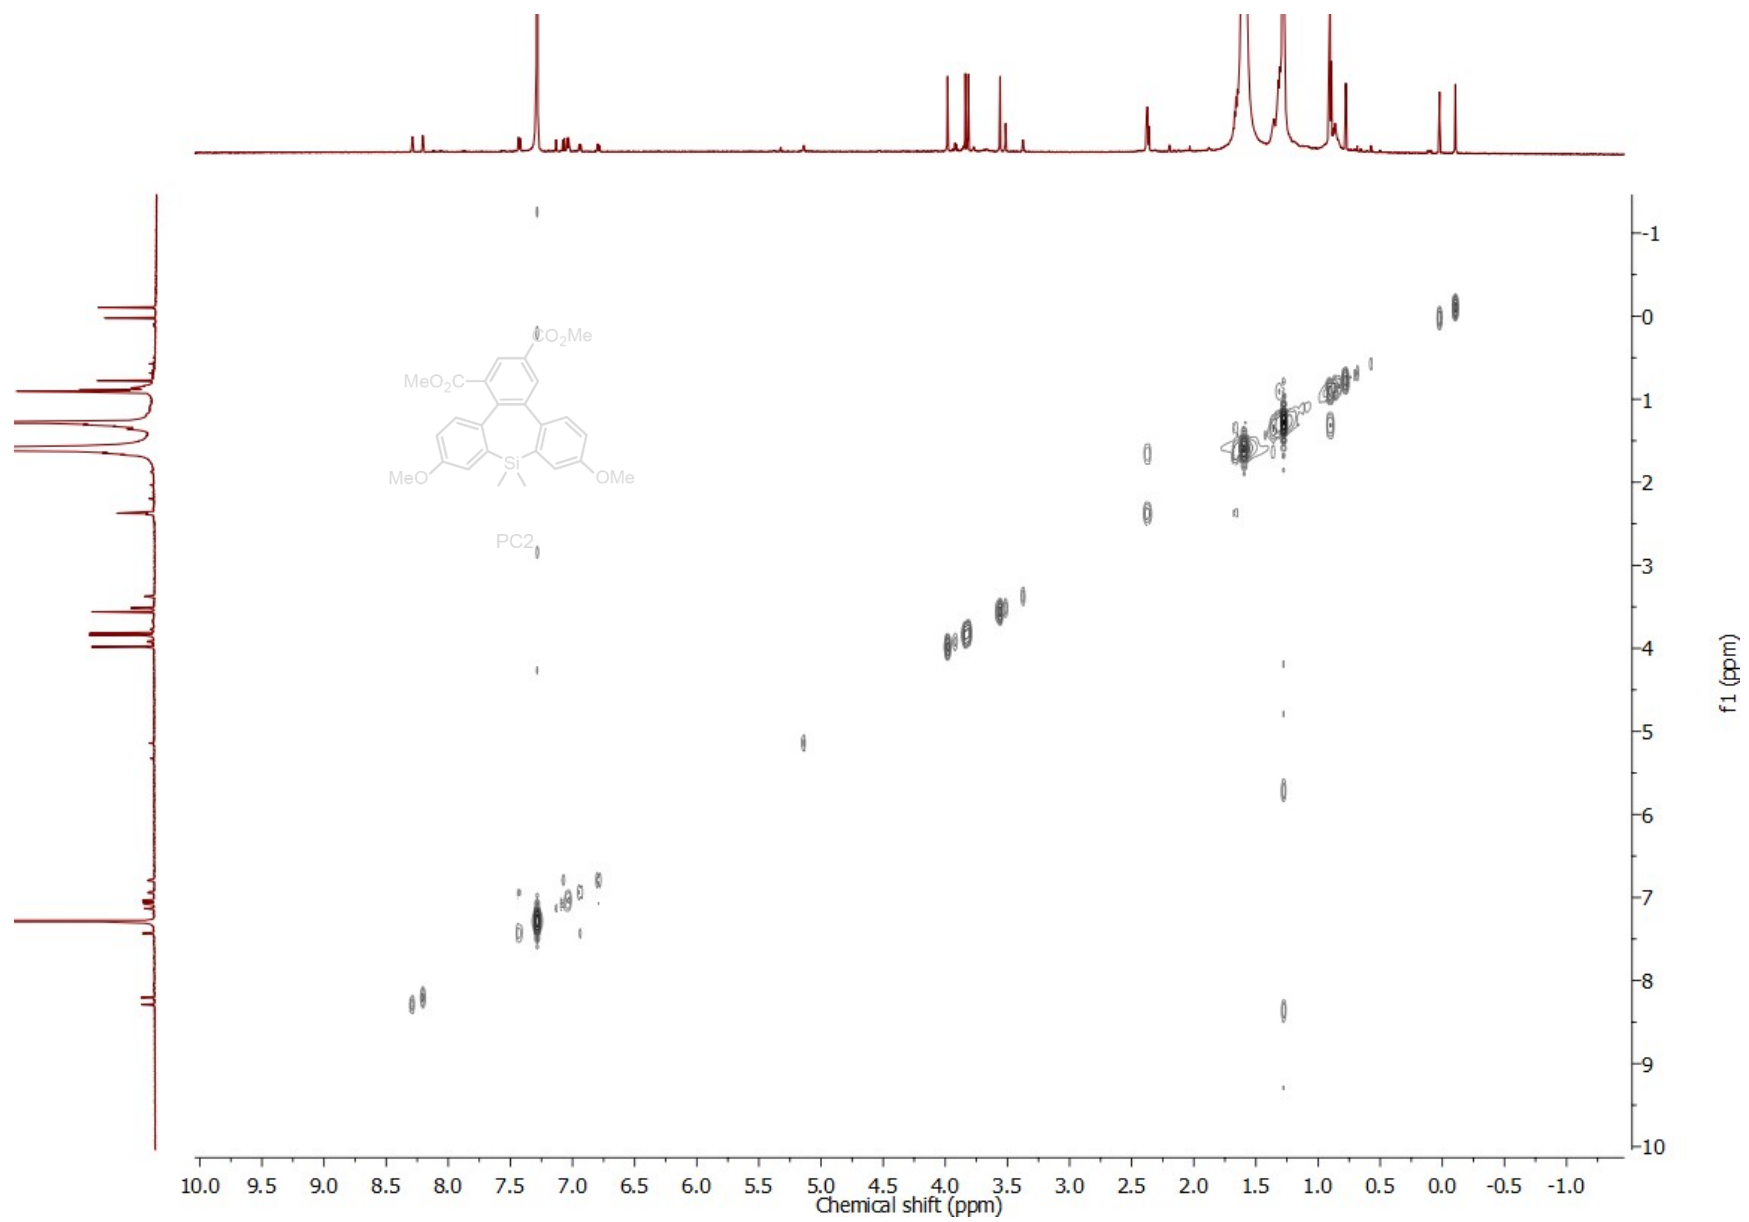

## 5. References

- (1) W. Huang, N. Gunawardhana, Y. Zhang, J. Escorihuela and S. T. Laughlin, *Chem. Eur. J.* 2024, **30**, e202303465.
- (2) T.; Cruchter, K.; Harms and E. Meggers, *Chem. Eur. J.* 2013, **19**, 16682–16689.
- (3) S. Bernard, R. A. Kumar, K. Porte, P. Thuéry, F. Taran and D. Audisio, *Eur. J. Org. Chem.* 2018, **2018**, 2000–2008.
- (4) J. Yang, J. Šečkutě, C. M. Cole and N. K. Devaraj, *Angew. Chem. Int. Ed.* 2012, **51**, 7476–7479.
- (5) M. Martínek, L. Filipová, J. Galeta, L. Ludvíková and P. Klán, *Org. Lett.* 2016, **18**, 4892–4895.
- (6) Gaussian 16, Revision B.01, M. J. Frisch, G. W. Trucks, H. B. Schlegel, G. E. Scuseria, M. A. Robb, J. R. Cheeseman, G. Scalmani, V. Barone, G. A. Petersson, H. Nakatsuji, X. Li, M. Caricato, A. V. Marenich, J. Bloino, B. G. Janesko, R. Gomperts, B. Mennucci, H. P. Hratchian, J. V. Ortiz, A. F. Izmaylov, J. L. Sonnenberg, D. Williams-Young, F. Ding, F. Lipparini, F. Egidi, J. Goings, B. Peng, A. Petrone, T. Henderson, D. Ranasinghe, V. G. Zakrzewski, J. Gao, N. Rega, G. Zheng, W. Liang, M. Hada, M. Ehara, K. Toyota, R. Fukuda, J. Hasegawa, M. Ishida, T. Nakajima, Y. Honda, O. Kitao, H. Nakai, T. Vreven, K. Throssell, J. A. Montgomery, Jr., J. E. Peralta, F. Ogliaro, M. J. Bearpark, J. J. Heyd, E. N. Brothers, K. N. Kudin, V. N. Staroverov, T. A. Keith, R. Kobayashi, J. Normand, K. Raghavachari, A. P. Rendell, J. C. Burant, S. S. Iyengar, J. Tomasi, M. Cossi, J. M. Millam, M. Klene, C. Adamo, R. Cammi, J. W. Ochterski, R. L. Martin, K. Morokuma, O. Farkas, J. B. Foresman, and D. J. Fox, Gaussian, Inc., Wallingford CT, 2016.
- (7) Y. Zhao, D. G. Truhlar, *Theor. Chem. Acc.*, 2008, **120**, 215–241.
- (8) A. V. Marenich, C. J. Cramer and D. G. Truhlar, *J. Phys. Chem. B*, 2009, **113**, 6378–6396.
- (9) (a) R. S. Paton, J. L. Mackey, W. H. Kim, J. H. Lee, S. J. Danishefsky and K. N. Houk, *J. Am. Chem. Soc.*, 2010, **132**, 9335–9340; (b) F. Liu, Y. Liang and K. N. Houk, *J. Am. Chem. Soc.*, 2014, **136**, 11483–11493.
- (10) (a) C. Gonzalez and H. B. Schlegel, *J. Phys. Chem.*, 1990, **94**, 5523–5527. (b) K. Fukui, *Acc. Chem. Res.*, 1981, **14**, 363–368.
- (11) C. Y. Legault, CYLview, 1.0b; Université de Sherbrooke: Canada, 2009; <http://www.cylview.org>.
